# Supplementary material for: DFT study on theE-stereoselective reductive A3-coupling reaction of terminal alkynes with aldehydes and 3-pyrroline
Source: Royal Society of Chemistry journal article supplement (doi:10.1039/d0qo00564a), 2020-01-01
Supplement: d0qo00564a1.pdf [file d0qo00564a1.pdf]

## Electronic Supplementary Information

### DFT study on *E*-stereoselective reductive A<sup>3</sup>-coupling reaction of terminal alkynes with aldehydes and 3-pyrroline

Yuan Yao,<sup>a</sup> Xue Zhang,<sup>\*b</sup> and Shengming Ma<sup>\*a,b</sup>

<sup>a</sup> Research Center for Molecular Recognition and Synthesis, Department of Chemistry, Fudan University, 220 Handan Lu, Shanghai 200433, P. R. China

<sup>b</sup> State Key Laboratory of Organometallic Chemistry, Shanghai Institute of Organic Chemistry, Chinese Academy of Sciences, 345 Lingling Lu, Shanghai 200032, P. R. China

E-mail: [masm@sioc.ac.cn](mailto:masm@sioc.ac.cn)

[xzhang@sioc.ac.cn](mailto:xzhang@sioc.ac.cn)

#### List of Contents

|                                                                        |          |
|------------------------------------------------------------------------|----------|
| Energy profiles for the 1-octyne participated system                   | S2–S6    |
| 3D optimized structures of intermediates and transition states         | S7–S9    |
| M06-2X free energy profile without the Grimme's dispersion corrections | S10–S11  |
| Energies of intermediates and transition states                        | S12–S13  |
| Cartesian coordinates for the optimized structures                     | S14–S112 |

## 1. Energy profiles for the 1-octyne participated system

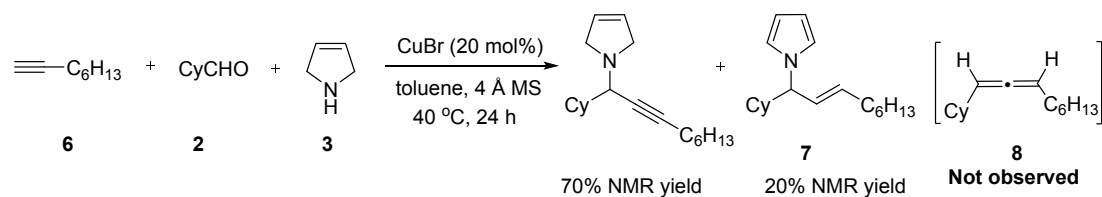

**Scheme S1** Reductive  $\text{A}^3$ -coupling reaction of 1-octyne with cyclohexanal and 3-pyrroline

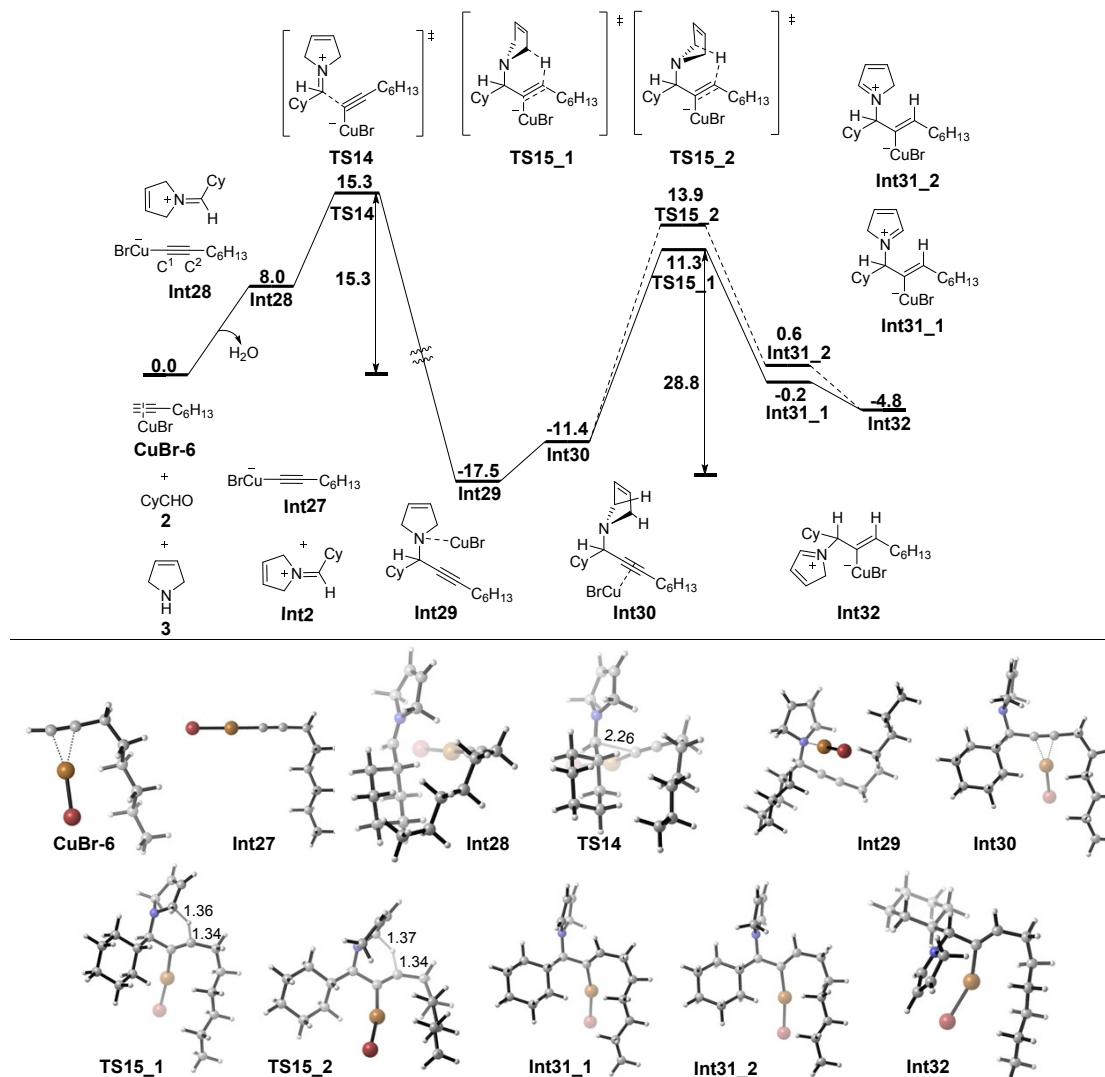

**Figure S1.** Free energy profile ( $\Delta G$  in  $\text{kcal mol}^{-1}$ ) for the formation of propargylic amine and the subsequent 1,5-H transfer for 1-octyne participated system. Bond lengths are given in angstroms.

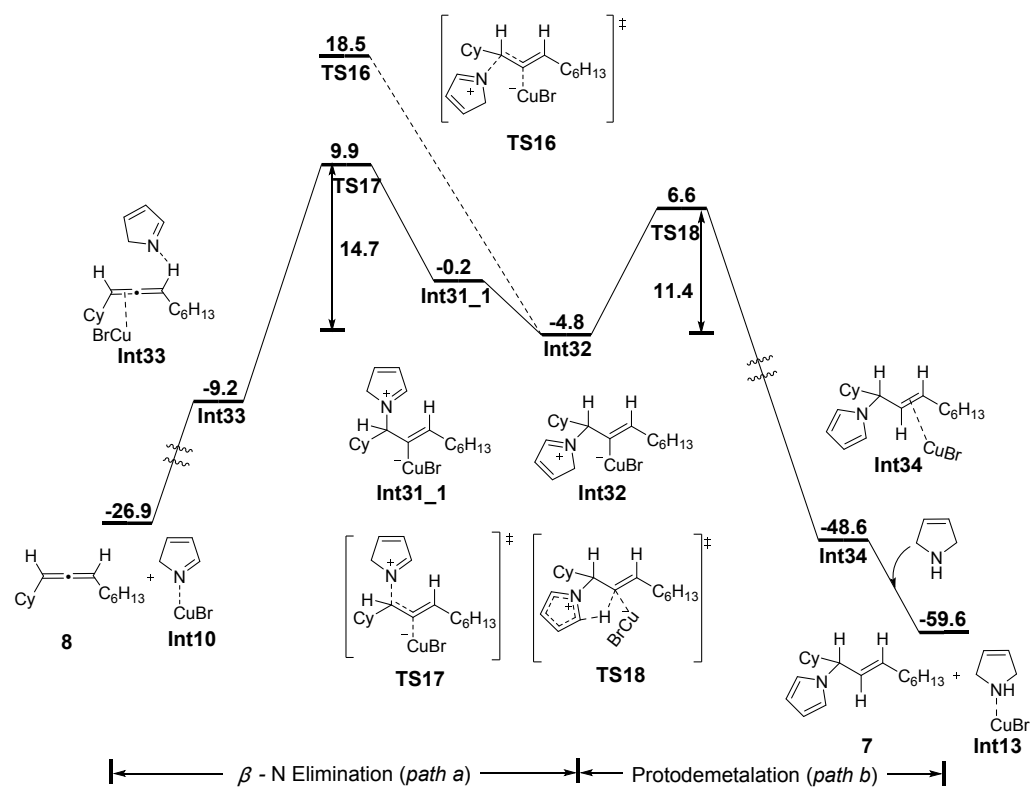

**Figure S2.** Free energy profile ( $\Delta G$  in kcal mol<sup>-1</sup>) for either intramolecular protodemetalation or  $\beta$ -N elimination for 1-octyne participated system. Bond lengths are given in angstroms.

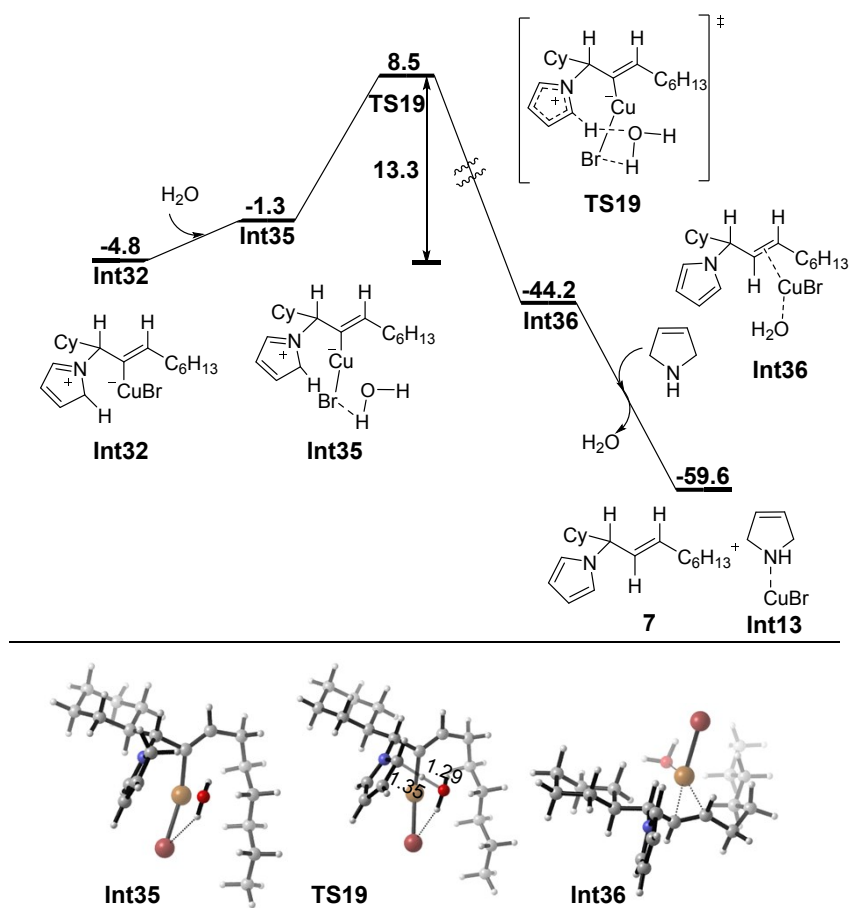

**Figure S3.** Free energy profile ( $\Delta G$  in kcal mol<sup>-1</sup>) for H<sub>2</sub>O assisted protodemetalation of **Int32**. Bond lengths are given in angstroms.

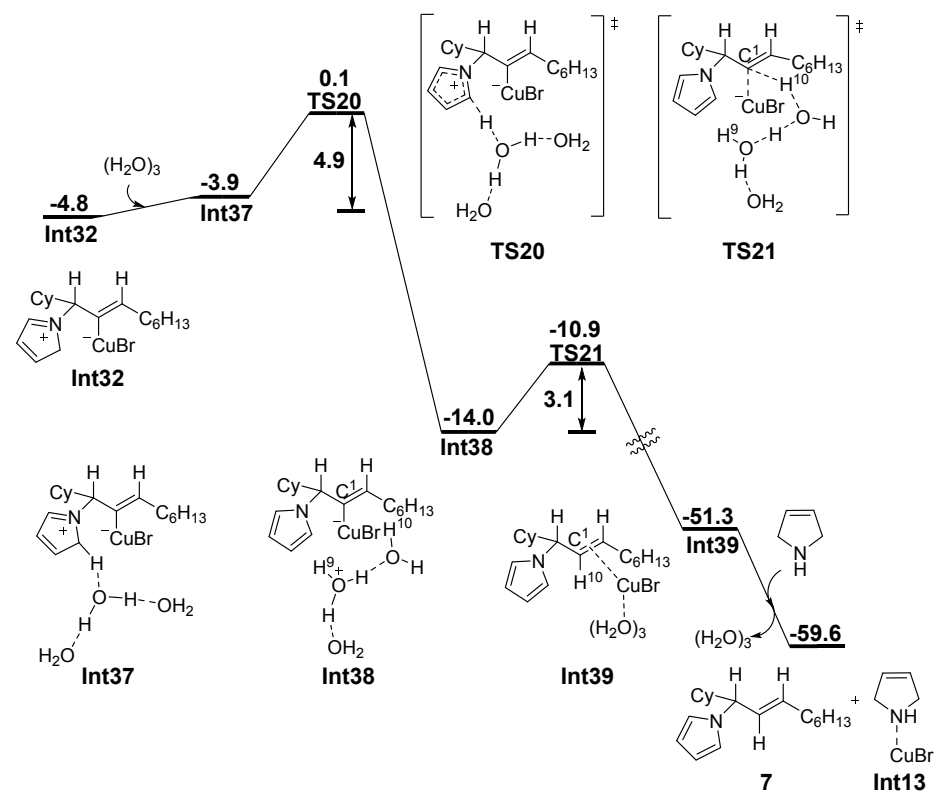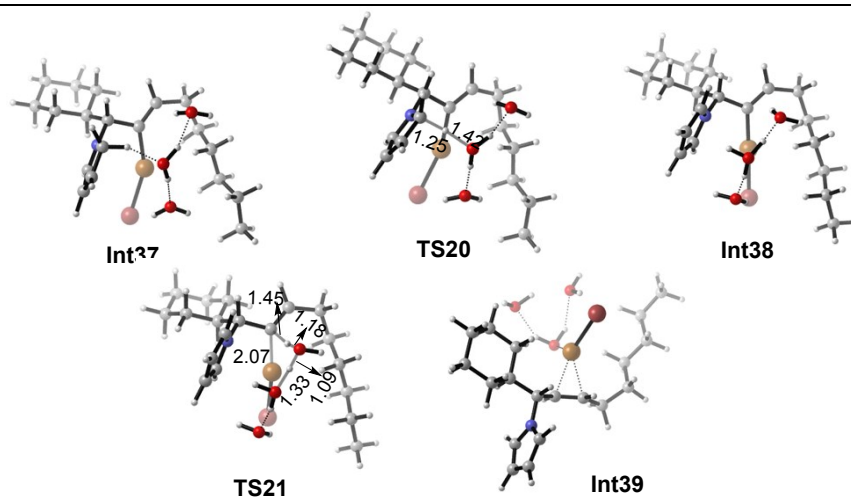

**Figure S4.** Free energy profile ( $\Delta G$  in kcal mol<sup>-1</sup>) for water cluster assisted stepwise protodemetalation of **Int32**. Bond lengths are given in angstroms.

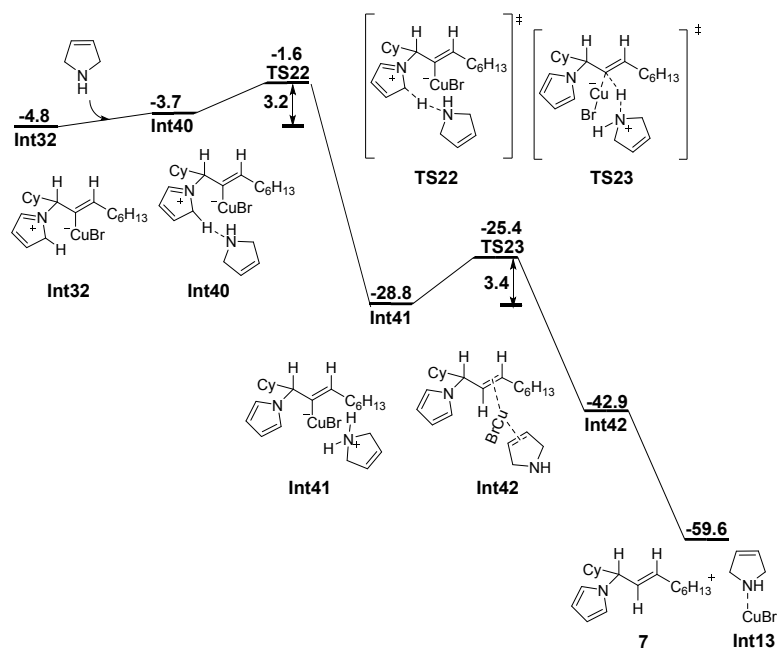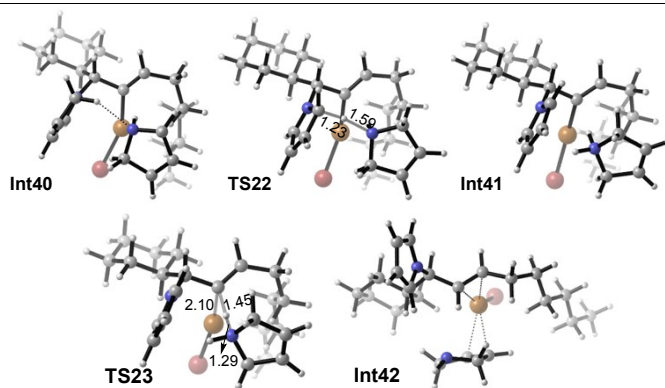

**Figure S5.** Free energy profile ( $\Delta G$  in kcal mol<sup>-1</sup>) for 3-pyrroline assisted stepwise protodemetalation of **Int32**. Bond lengths are given in angstroms.

**Table S1.** The summary of activation energies ( $\Delta G$  in kcal mol<sup>-1</sup>) for the processes from **Int32**.

| Assisted species  | Protodemetalation |                               |                                 |                                                                                      | $\beta$ -N elimination |
|-------------------|-------------------|-------------------------------|---------------------------------|--------------------------------------------------------------------------------------|------------------------|
|                   | none <sup>a</sup> | H <sub>2</sub> O <sup>a</sup> | (H <sub>2</sub> O) <sub>3</sub> |  |                        |
| Deprotonation     | 11.4              | 13.3                          | 4.9                             | 3.2                                                                                  | 14.7                   |
| Protodemetalation |                   |                               | 3.1                             | 3.4                                                                                  |                        |

a: the protodemetalation proceeds in the concerted manner.

## 2. 3D optimized structures of intermediates and transition states

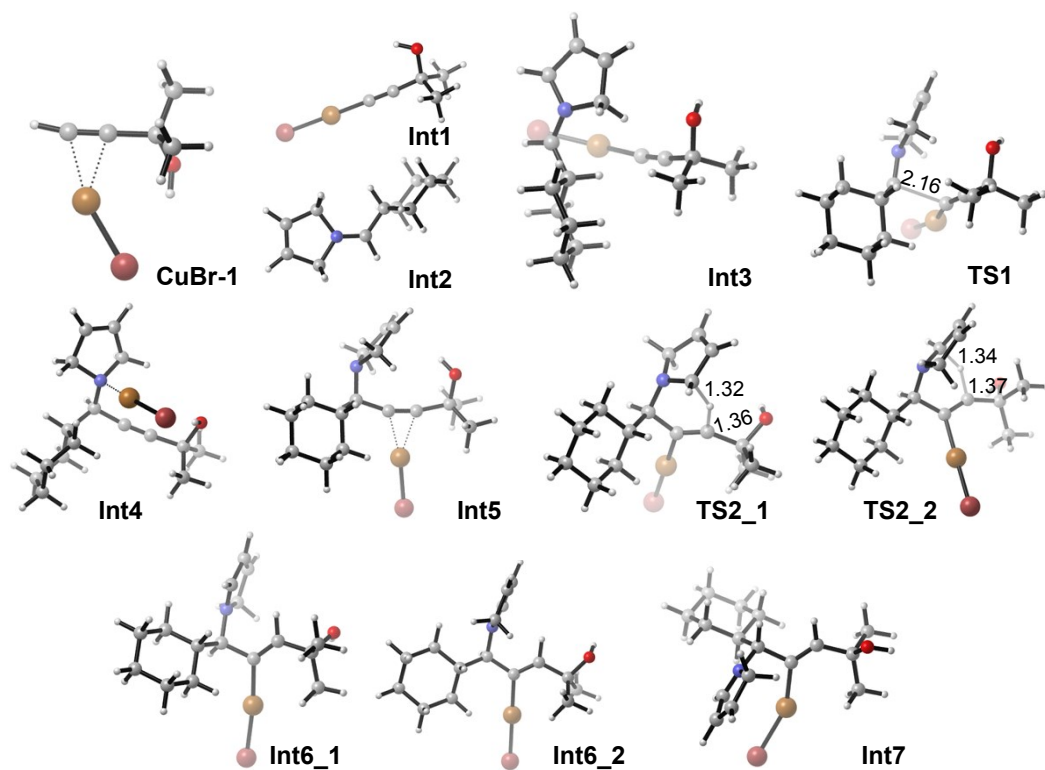

Figure S6 3D-structures for the stationary points showed in Figure 1.

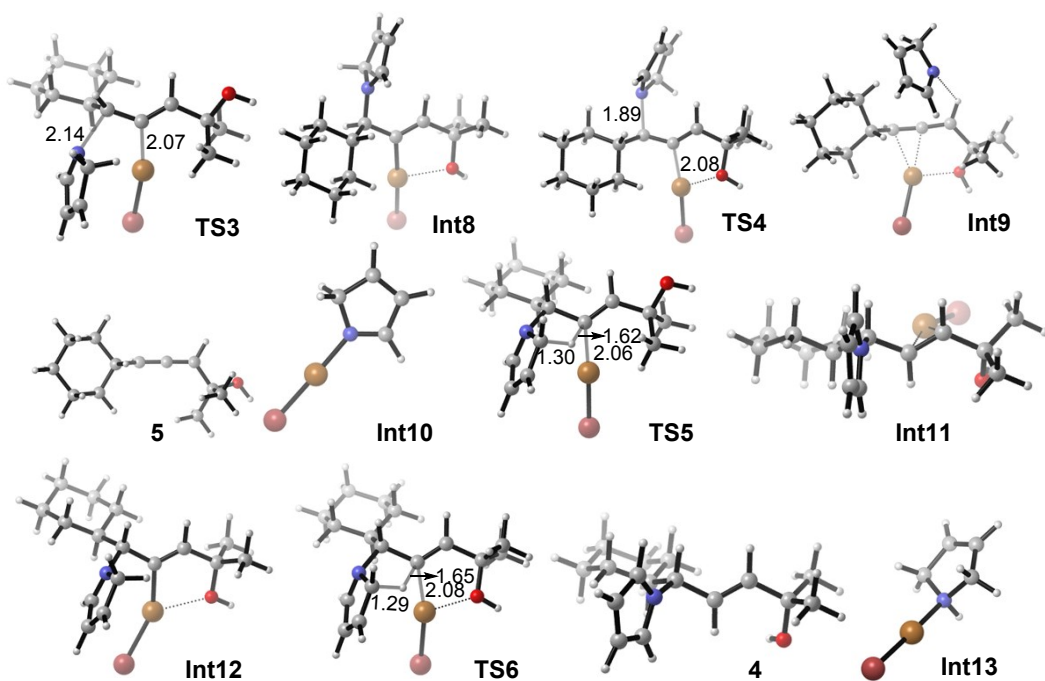

Figure S7 3D-structures for the stationary points showed in Figure 2.

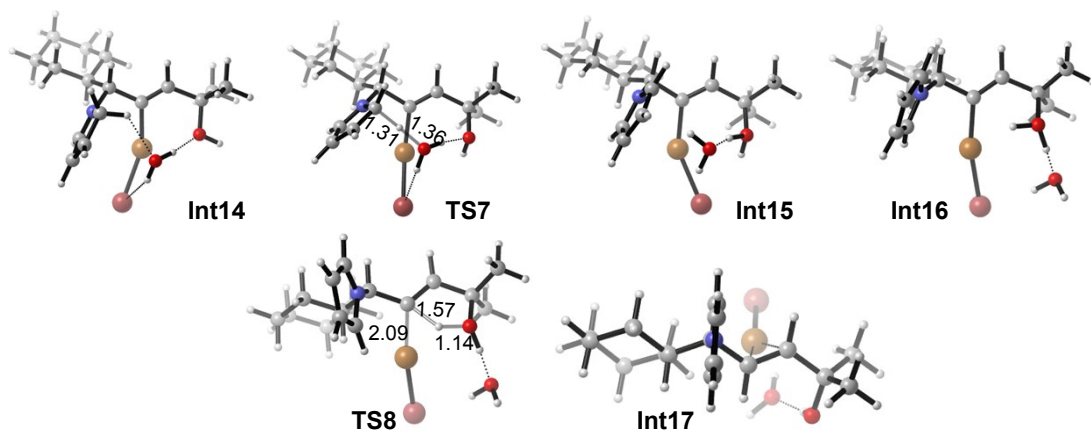

**Figure S8** 3D-structures for the stationary points showed in Figure 3.

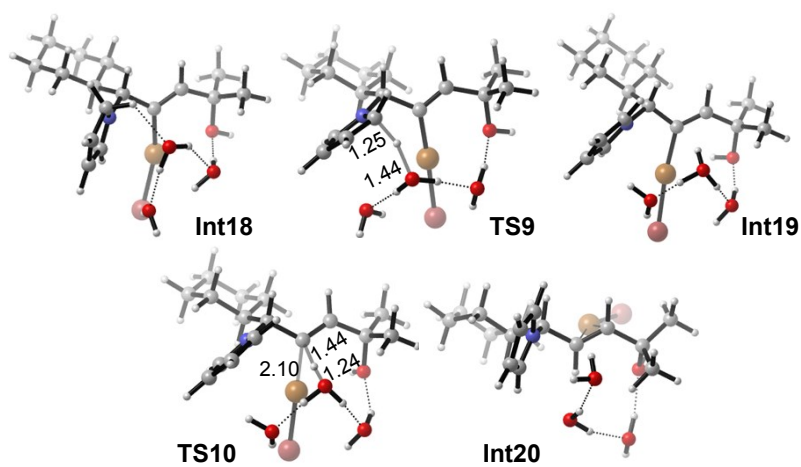

**Figure S9** 3D-structures for the stationary points showed in Figure 4.

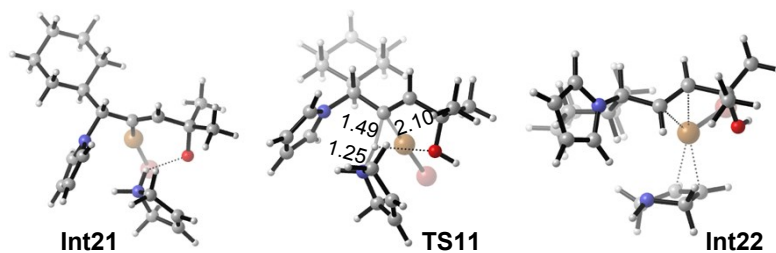

**Figure S10** 3D-structures for the stationary points showed in Figure 5.



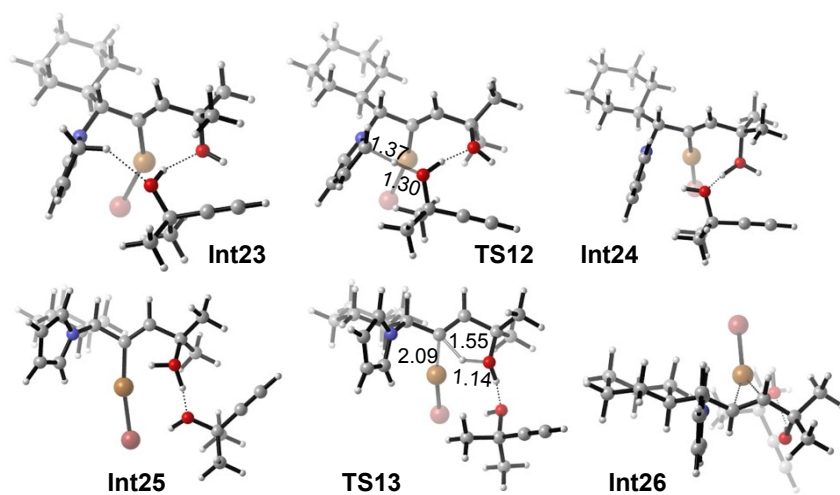

**Figure S11** 3D-structures for the stationary points showed in Figure 6

### 3. M06-2X free energy profile without the Grimme's dispersion corrections

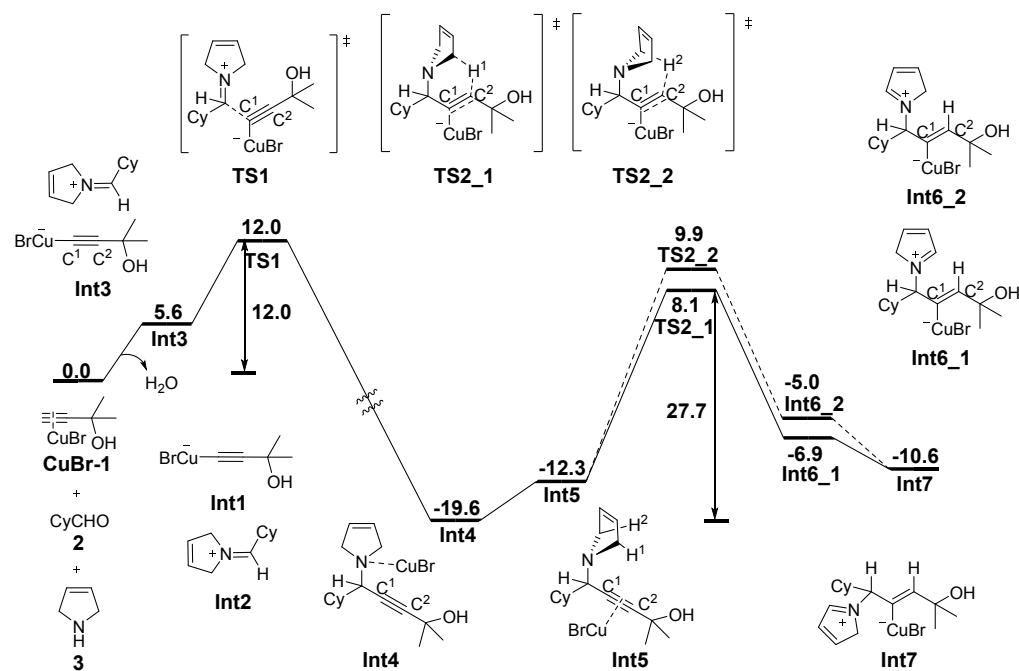

**Figure S12** Free energy profile (ΔG in kcal mol<sup>-1</sup>) without the Grimme's dispersion corrections for Figure 1 in main article. Calculations were performed at M06-2X/SDD,6-311++G(d,p)/SMD(toluene)//M06-2X/LANL2DZ,6-31G(d,p) level.

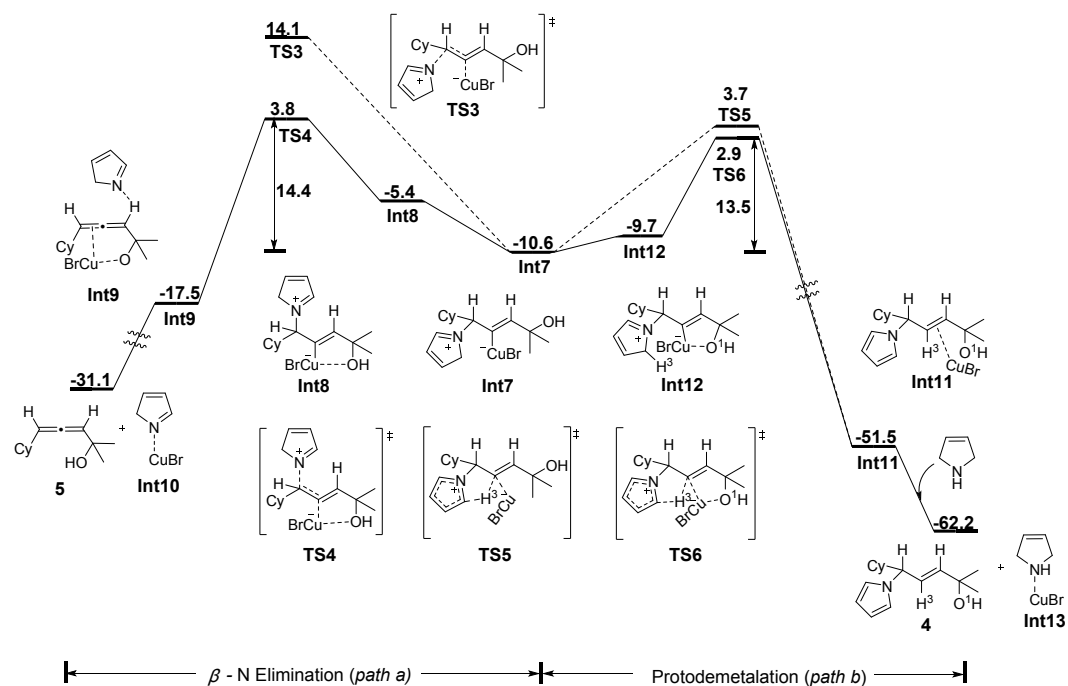

**Figure S13** Free energy profile ( $\Delta G$  in kcal mol<sup>-1</sup>) without the Grimme's dispersion corrections for Figure 1 in main article. Calculations were performed at M06-2X/SDD,6-311++G(d,p)/SMD(toluene)//M06-2X/LANL2DZ,6-31G(d,p) level.

**Table S2.** Activation energies ( $\Delta G$  in kcal mol<sup>-1</sup>) without the Grimme's dispersion corrections for Table 1 in main article.

| Assisted species  | Protodemetalation |                  |                                 |                                                                                   |                                                                                    | $\beta$ -N elimination |
|-------------------|-------------------|------------------|---------------------------------|-----------------------------------------------------------------------------------|------------------------------------------------------------------------------------|------------------------|
|                   | none              | H <sub>2</sub> O | (H <sub>2</sub> O) <sub>3</sub> | 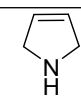 |  |                        |
| Deprotonation     | 13.5              | 8.3              | 5.3                             | No barrier                                                                        | 11.4                                                                               | 14.4                   |
| Protodemetalation |                   | No barrier       | 4.1                             | 2.2                                                                               | 1.8                                                                                |                        |

Calculations were performed at M06-2X/SDD,6-311++G(d,p)/SMD(toluene)//M06-2X/LANL2DZ,6-31G(d,p) level.

#### 4. Energies of intermediates and transition states

**Table S2.** Electronic energies ( $E_{elec}$ ), enthalpies ( $H_{298}$ ), Gibbs free energies ( $G_{298}$ ), thermal correction to Gibbs free energy ( $cor G_{gas}$ ), solvation energies ( $E_{sol}$ ), solvation free energies ( $G_{sol}$ ) in toluene ( $\epsilon = 2.37$ ) for all stationary points of the this process.

| species               | $E_{elec}$<br>(a.u.) | $H_{298}$<br>(a.u.) | $G_{298}$<br>(a.u.) | $cor G_{gas}$<br>(a.u.) | $E_{sol}$<br>(a.u.) | $G_{sol}$<br>(a.u.) |
|-----------------------|----------------------|---------------------|---------------------|-------------------------|---------------------|---------------------|
| <b>CuBr-1</b>         | -479.7791386         | -479.646625         | -479.696582         | 0.082556                | -481.2811356        | -481.1985796        |
| <b>2</b>              | -349.0432804         | -348.853524         | -348.894219         | 0.149062                | -349.1412618        | -348.9921998        |
| <b>3</b>              | -211.2556428         | -211.143394         | -211.176077         | 0.079566                | -211.3174237        | -211.2378577        |
| <b>H<sub>2</sub>O</b> | -76.3839203          | -76.358422          | -76.379845          | 0.004075                | -76.4253775         | -76.4213025         |
| <b>Int1</b>           | -479.2536709         | -479.132801         | -479.184228         | 0.069443                | -480.7977360        | -480.7282930        |
| <b>Int2</b>           | -484.3067794         | -484.017345         | -484.067232         | 0.239548                | -484.4718018        | -484.2322538        |
| <b>Int3</b>           | -963.7032963         | -963.290874         | -963.371129         | 0.332168                | -965.3331822        | -965.0010142        |
| <b>TS1</b>            | -963.6933220         | -963.281914         | -963.362210         | 0.331112                | -965.3222830        | -964.9911710        |
| <b>Int4</b>           | -963.7563649         | -963.342799         | -963.419051         | 0.337314                | -965.3782817        | -965.0409677        |
| <b>Int5</b>           | -963.7358294         | -963.323182         | -963.402812         | 0.333018                | -965.3622228        | -965.0292048        |
| <b>TS2_1</b>          | -963.7005654         | -963.292660         | -963.369365         | 0.331200                | -965.3280312        | -964.9968312        |
| <b>TS2_2</b>          | -963.6991230         | -963.291655         | -963.367854         | 0.331269                | -965.3251987        | -964.9939297        |
| <b>Int6_1</b>         | -963.7179924         | -963.306095         | -963.384424         | 0.333569                | -965.3546697        | -965.0211007        |
| <b>Int6_2</b>         | -963.7142135         | -963.302602         | -963.380381         | 0.333832                | -965.3514906        | -965.0176586        |
| <b>Int7</b>           | -963.7322855         | -963.320623         | -963.398750         | 0.333535                | -965.3603749        | -965.0268399        |
| <b>TS3</b>            | -963.6917308         | -963.283306         | -963.362375         | 0.329356                | -965.3165227        | -964.9871667        |
| <b>Int8</b>           | -963.7180759         | -963.306637         | -963.385510         | 0.332566                | -965.3510209        | -965.0184549        |
| <b>TS4</b>            | -963.7061612         | -963.296990         | -963.375887         | 0.330275                | -965.3341946        | -965.0039196        |
| <b>Int9</b>           | -963.7413028         | -963.331017         | -963.413536         | 0.327767                | -965.3648707        | -965.0371037        |
| <b>5</b>              | -544.2644001         | -543.949973         | -544.007130         | 0.257270                | -544.4142385        | -544.1569685        |
| <b>Int10</b>          | -419.4674925         | -419.373440         | -419.417790         | 0.049702                | -420.9501783        | -420.9004763        |
| <b>TS5</b>            | -963.7101408         | -963.303173         | -963.379344         | 0.330797                | -965.3349642        | -965.0041672        |
| <b>Int11</b>          | -963.8032436         | -963.390367         | -963.468367         | 0.334877                | -965.4267139        | -965.0918369        |
| <b>Int12</b>          | -963.7337181         | -963.322195         | -963.400837         | 0.332881                | -965.3581232        | -965.0252422        |
| <b>TS6</b>            | -963.7157662         | -963.308690         | -963.384407         | 0.331359                | -965.3366252        | -965.0052662        |
| <b>4</b>              | -754.4043592         | -753.997510         | -754.063854         | 0.340505                | -754.6078245        | -754.2673195        |
| <b>Int13</b>          | -420.6686271         | -420.549443         | -420.595268         | 0.073359                | -422.1522483        | -422.0788893        |
| <b>Int14</b>          | -1040.1505309        | -1039.710374        | -1039.792561        | 0.357970                | -1041.8047408       | -1041.4467708       |
| <b>TS7</b>            | -1040.1424673        | -1039.707213        | -1039.786245        | 0.356222                | -1041.7914407       | -1041.4352187       |
| <b>Int15</b>          | -1040.1656538        | -1039.726993        | -1039.805943        | 0.359711                | -1041.8132459       | -1041.4535349       |
| <b>Int16</b>          | -1040.1559669        | -1039.718411        | -1039.798311        | 0.357537                | -1041.8103901       | -1041.4528531       |
| <b>TS8</b>            | -1040.1530425        | -1039.718417        | -1039.801222        | 0.351820                | -1041.8053794       | -1041.4535594       |
| <b>Int17</b>          | -1040.2182178        | -1039.777445        | -1039.861750        | 0.356468                | -1041.8715172       | -1041.5150492       |
| <b>water cluster</b>  | -229.1920818         | -229.108922         | -229.145114         | 0.046968                | -229.3002131        | -229.2532451        |
| <b>Int18</b>          | -1192.9654637        | -1192.468408        | -1192.561454        | 0.404009                | -1194.6881463       | -1194.2841373       |
| <b>TS9</b>            | -1192.9635742        | -1192.470685        | -1192.561215        | 0.402359                | -1194.6783027       | -1194.2759437       |
| <b>Int19</b>          | -1193.0081258        | -1192.512644        | -1192.600662        | 0.407464                | -1194.7132409       | -1194.3057769       |

|                |               |              |              |          |               |               |
|----------------|---------------|--------------|--------------|----------|---------------|---------------|
| <b>TS10</b>    | -1192.9935419 | -1192.501466 | -1192.591352 | 0.402190 | -1194.7013957 | -1194.2992057 |
| <b>Int20</b>   | -1193.0164403 | -1192.518268 | -1192.612240 | 0.404201 | -1194.7403028 | -1194.3361018 |
| <b>Int21</b>   | -1175.0644907 | -1174.535778 | -1174.624929 | 0.439562 | -1176.7431713 | -1176.3036093 |
| <b>TS11</b>    | -1175.0568324 | -1174.534376 | -1174.623277 | 0.433555 | -1176.7336432 | -1176.3000882 |
| <b>Int22</b>   | -1175.0908807 | -1174.563566 | -1174.652566 | 0.438315 | -1176.7638585 | -1176.3255435 |
| <b>1</b>       | -270.3790451  | -270.252577  | -270.290855  | 0.088190 | -270.4642800  | -270.3760900  |
| <b>Int23</b>   | -1234.1466015 | -1233.605314 | -1233.699804 | 0.446797 | -1235.8457766 | -1235.3989796 |
| <b>TS12</b>    | -1234.1283871 | -1233.593939 | -1233.686287 | 0.442100 | -1235.8288837 | -1235.3867837 |
| <b>Int24</b>   | -1234.1476311 | -1233.609718 | -1233.704664 | 0.442967 | -1235.8483701 | -1235.4054031 |
| <b>Int25</b>   | -1234.1514502 | -1233.611951 | -1233.707068 | 0.444382 | -1235.8531315 | -1235.4087495 |
| <b>TS13</b>    | -1234.1490857 | -1233.613312 | -1233.707614 | 0.441472 | -1235.8472964 | -1235.4058244 |
| <b>Int26</b>   | -1234.2123876 | -1233.670457 | -1233.767631 | 0.444756 | -1235.9117979 | -1235.4670419 |
| <b>CuBr-6</b>  | -522.4717156  | -522.254245  | -522.313188  | 0.158527 | -523.9754899  | -523.8169629  |
| <b>Int27</b>   | -521.9394542  | -521.733207  | -521.792548  | 0.146906 | -523.4844656  | -523.3375596  |
| <b>Int28</b>   | -1006.3928606 | -1005.895474 | -1005.982275 | 0.410586 | -1008.0235561 | -1007.6129700 |
| <b>TS14</b>    | -1006.3831805 | -1005.886586 | -1005.971621 | 0.411559 | -1008.0128929 | -1007.6013339 |
| <b>Int29</b>   | -1006.4425947 | -1005.944350 | -1006.030396 | 0.412198 | -1008.0658065 | -1007.6536085 |
| <b>Int30</b>   | -1006.4301647 | -1005.932180 | -1006.018894 | 0.411270 | -1008.0551238 | -1007.6438538 |
| <b>TS15_1</b>  | -1006.3928694 | -1005.900119 | -1005.983634 | 0.409236 | -1008.0170254 | -1007.6077894 |
| <b>TS15_2</b>  | -1006.3917906 | -1005.899112 | -1005.981182 | 0.410609 | -1008.0142517 | -1007.6036427 |
| <b>Int31_1</b> | -1006.4084510 | -1005.911324 | -1005.995230 | 0.413221 | -1008.0392904 | -1007.6260694 |
| <b>Int31_2</b> | -1006.4042818 | -1005.907281 | -1005.992014 | 0.412267 | -1008.0369823 | -1007.6247153 |
| <b>Int32</b>   | -1006.4248198 | -1005.927411 | -1006.010692 | 0.414128 | -1008.0474465 | -1007.6333185 |
| <b>TS16</b>    | -1006.3850413 | -1005.891188 | -1005.976469 | 0.408572 | -1008.0047803 | -1007.5962083 |
| <b>TS17</b>    | -1006.3930884 | -1005.898585 | -1005.983684 | 0.409404 | -1008.0193946 | -1007.6099906 |
| <b>Int33</b>   | -1006.4208263 | -1005.925595 | -1006.015112 | 0.405715 | -1008.0460476 | -1007.6403326 |
| <b>8</b>       | -586.9580189  | -586.558213  | -586.621629  | 0.336390 | -587.1044743  | -586.7680843  |
| <b>TS18</b>    | -1006.4021529 | -1005.909671 | -1005.993213 | 0.408940 | -1008.0241459 | -1007.6152059 |
| <b>Int34</b>   | -1006.4875866 | -1005.989835 | -1006.078022 | 0.409565 | -1008.1126696 | -1007.7031046 |
| <b>7</b>       | -797.0931543  | -796.601192  | -796.677211  | 0.415943 | -797.2956076  | -796.8796646  |
| <b>Int35</b>   | -1082.8340903 | -1082.30815  | -1082.395261 | 0.438829 | -1084.4878463 | -1084.0490173 |
| <b>TS19</b>    | -1082.8199966 | -1082.299902 | -1082.385913 | 0.434083 | -1084.4676040 | -1084.0335210 |
| <b>Int36</b>   | -1082.9007971 | -1082.374401 | -1082.465975 | 0.434822 | -1084.5523472 | -1084.1175252 |
| <b>Int37</b>   | -1235.6430952 | -1235.061037 | -1235.163757 | 0.479339 | -1237.3645144 | -1236.8851754 |
| <b>TS20</b>    | -1235.6410725 | -1235.063727 | -1235.161871 | 0.479202 | -1237.3579900 | -1236.8787880 |
| <b>Int38</b>   | -1235.6742052 | -1235.093668 | -1235.189988 | 0.484217 | -1237.3854793 | -1236.9012623 |
| <b>TS21</b>    | -1235.6624164 | -1235.086779 | -1235.184448 | 0.477969 | -1237.3743100 | -1236.8963410 |
| <b>Int39</b>   | -1235.7232878 | -1235.140034 | -1235.245388 | 0.477900 | -1237.4386031 | -1236.9607031 |
| <b>Int40</b>   | -1217.7043261 | -1217.092773 | -1217.191494 | 0.512832 | -1219.3822585 | -1218.8694265 |
| <b>TS22</b>    | -1217.7022504 | -1217.094470 | -1217.190496 | 0.511755 | -1219.3779356 | -1218.8661806 |
| <b>Int41</b>   | -1217.7458666 | -1217.132939 | -1217.229909 | 0.515957 | -1219.4254475 | -1218.9094905 |
| <b>TS23</b>    | -1217.7408001 | -1217.132641 | -1217.227667 | 0.513133 | -1219.4172381 | -1218.9041051 |
| <b>Int42</b>   | -1217.7663667 | -1217.153904 | -1217.252793 | 0.513573 | -1219.4455510 | -1218.9319780 |

## 5. Cartesian coordinates for the optimized structures

### CuBr-1

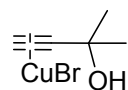

|    |             |             |             |
|----|-------------|-------------|-------------|
| C  | -1.43383600 | 2.10426100  | -0.13185800 |
| C  | -1.68717300 | 0.91145200  | -0.07602000 |
| C  | -2.01214300 | -0.55235900 | 0.02046200  |
| Cu | 0.49953600  | 1.05762800  | 0.01209200  |
| Br | 2.16836300  | -0.58331300 | 0.01429500  |
| C  | -1.72460500 | -1.23118800 | -1.32048900 |
| H  | -2.00527700 | -2.28404200 | -1.23884800 |
| H  | -2.29637200 | -0.76805600 | -2.12818400 |
| H  | -0.65791700 | -1.17193900 | -1.56176700 |
| O  | -1.26448000 | -1.13224100 | 1.06378500  |
| H  | -0.35991000 | -1.32195100 | 0.75992700  |
| C  | -3.48341700 | -0.67681400 | 0.41516900  |
| H  | -4.12917300 | -0.20292200 | -0.32729900 |
| H  | -3.72715000 | -1.73907500 | 0.48437300  |
| H  | -3.64706400 | -0.21393100 | 1.38986200  |
| H  | -1.39351600 | 3.17248500  | -0.18290600 |

### 2

### CyCHO

|   |             |             |             |
|---|-------------|-------------|-------------|
| C | 2.11099400  | 0.42144600  | 0.16166500  |
| H | 2.49879500  | 1.42195400  | 0.45856900  |
| C | 0.64470300  | 0.20004500  | 0.44216800  |
| C | -0.18135000 | 1.33661000  | -0.18442300 |
| C | 0.16484600  | -1.16924500 | -0.03183000 |
| H | 0.52562500  | 0.27547700  | 1.53665900  |
| C | -1.67166700 | 1.14479000  | 0.10417900  |
| H | -0.01841900 | 1.33312300  | -1.27108700 |
| H | 0.16413200  | 2.30789700  | 0.18840100  |
| C | -1.32757100 | -1.35352400 | 0.24913200  |
| H | 0.35588900  | -1.24841200 | -1.10978700 |
| H | 0.75911000  | -1.95559500 | 0.44293000  |
| C | -2.15305600 | -0.22644900 | -0.37653000 |
| H | -2.25119100 | 1.94278200  | -0.37102600 |
| H | -1.84017400 | 1.22894900  | 1.18644800  |
| H | -1.66405200 | -2.32512100 | -0.12616900 |
| H | -1.49349700 | -1.35963600 | 1.33532400  |
| H | -3.21501300 | -0.35739100 | -0.14494100 |
| H | -2.05746600 | -0.27602900 | -1.46973700 |
| O | 2.83935800  | -0.38875500 | -0.35521900 |

3

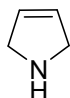

|   |             |             |             |
|---|-------------|-------------|-------------|
| N | 0.00002600  | -1.21996200 | -0.06186500 |
| C | 1.18098400  | -0.35452900 | 0.11620600  |
| H | 1.59931300  | -0.47949700 | 1.12502800  |
| H | 1.97233500  | -0.62790000 | -0.58938900 |
| C | -1.18096700 | -0.35457700 | 0.11621500  |
| H | -1.59928800 | -0.47955200 | 1.12504100  |
| H | -1.97230900 | -0.62798600 | -0.58937300 |
| C | -0.66462000 | 1.05699200  | -0.06407000 |
| C | 0.66457400  | 1.05702100  | -0.06405200 |
| H | 1.30575700  | 1.92953600  | -0.11856200 |
| H | -1.30584200 | 1.92947700  | -0.11859100 |
| H | 0.00003200  | -1.53378400 | -1.02689100 |

**H<sub>2</sub>O**

|   |            |             |             |
|---|------------|-------------|-------------|
| O | 0.00000000 | 0.00000000  | 0.11779300  |
| H | 0.00000000 | 0.76021000  | -0.47117300 |
| H | 0.00000000 | -0.76021000 | -0.47117300 |

**Int1**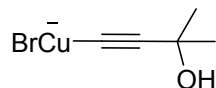

|    |             |             |             |
|----|-------------|-------------|-------------|
| C  | -2.12688300 | 0.01343500  | -0.04322200 |
| C  | -0.90067300 | 0.01095200  | -0.04139100 |
| Cu | 1.06097100  | 0.00630800  | -0.02606000 |
| Br | 3.44176800  | -0.00307000 | 0.00583300  |
| C  | -4.19345100 | 1.25430800  | -0.61758200 |
| H  | -5.28180600 | 1.24850800  | -0.49350000 |
| H  | -3.78509400 | 2.14171200  | -0.13005100 |
| H  | -3.95090900 | 1.29344600  | -1.68274000 |
| C  | -4.16180600 | -1.26109800 | -0.63672000 |
| H  | -3.73926800 | -2.14576400 | -0.15536400 |
| H  | -5.25104800 | -1.27979200 | -0.52259200 |
| H  | -3.90772600 | -1.28688100 | -1.69984500 |
| O  | -4.02727100 | -0.00357600 | 1.39984800  |
| H  | -3.22158500 | -0.12373800 | 1.91375900  |
| C  | -3.59626300 | 0.00000800  | 0.02610300  |

**Int2**

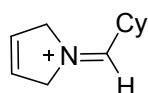

|   |             |             |             |
|---|-------------|-------------|-------------|
| C | -0.49194300 | -0.60891600 | -0.52736800 |
| H | -0.42548400 | -1.31568300 | -1.35808500 |
| C | 0.76875500  | -0.11905100 | 0.07141200  |
| C | 1.70634700  | -1.30598200 | 0.38202600  |
| C | 1.43527600  | 0.84994200  | -0.94289000 |
| H | 0.56250300  | 0.43073400  | 0.99695000  |
| C | 3.04549300  | -0.79668300 | 0.92023300  |
| H | 1.87438200  | -1.87489400 | -0.54255900 |
| H | 1.23308800  | -1.98245200 | 1.10066800  |
| C | 2.77630900  | 1.34113000  | -0.39128300 |
| H | 1.59923100  | 0.31695100  | -1.88868800 |
| H | 0.76801000  | 1.69266600  | -1.15307500 |
| C | 3.70624700  | 0.17323800  | -0.05999200 |
| H | 3.69873800  | -1.65028400 | 1.11897100  |
| H | 2.87964600  | -0.29425800 | 1.88181700  |
| H | 3.23787200  | 2.00691100  | -1.12549300 |
| H | 2.59649700  | 1.93869200  | 0.51149700  |
| H | 4.64375000  | 0.54944200  | 0.35721700  |
| H | 3.96244300  | -0.36094000 | -0.98397300 |
| N | -1.67618500 | -0.25609800 | -0.18424100 |
| C | -2.91536400 | -0.75666500 | -0.85043000 |
| C | -2.00313500 | 0.70806900  | 0.90424900  |
| C | -3.99320400 | -0.01708300 | -0.11464700 |
| H | -2.87087600 | -0.51670500 | -1.91706000 |
| C | -3.50094400 | 0.77426700  | 0.83003700  |
| H | -1.63304200 | 0.31752300  | 1.85763200  |
| H | -5.03920400 | -0.14775700 | -0.35954400 |
| H | -4.07289400 | 1.40748300  | 1.49567500  |
| H | -1.51128500 | 1.66456100  | 0.70014600  |
| H | -2.97309800 | -1.84289500 | -0.73049200 |

**Int3**

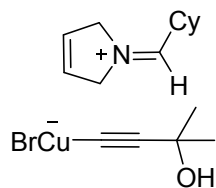

|   |             |             |             |
|---|-------------|-------------|-------------|
| C | 0.76320600  | 0.79410900  | 1.24886500  |
| C | -0.64500200 | -1.01849200 | -1.52694900 |
| C | -1.82885200 | -1.23054600 | -1.28460400 |



|    |             |             |             |
|----|-------------|-------------|-------------|
| C  | -3.19665000 | -1.56544400 | -0.83885100 |
| H  | 1.77105200  | 1.21255400  | 1.22615000  |
| C  | -0.37141200 | 1.56436700  | 0.67212800  |
| C  | -1.02654800 | 2.41432600  | 1.78746300  |
| C  | 0.10350700  | 2.46023300  | -0.48053000 |
| H  | -1.10711200 | 0.85325400  | 0.27495900  |
| C  | -2.19446700 | 3.22013100  | 1.21308400  |
| H  | -0.27696200 | 3.09881600  | 2.20710100  |
| H  | -1.37065000 | 1.77208500  | 2.60637600  |
| C  | -1.07160600 | 3.25724800  | -1.04399900 |
| H  | 0.88258800  | 3.14257700  | -0.11211700 |
| H  | 0.55706600  | 1.84638600  | -1.26443700 |
| C  | -1.74587900 | 4.09611000  | 0.04242500  |
| H  | -2.63996800 | 3.83059000  | 2.00479500  |
| H  | -2.97030600 | 2.52402900  | 0.86830900  |
| H  | -0.72531100 | 3.89468400  | -1.86260800 |
| H  | -1.79651400 | 2.55209200  | -1.47277000 |
| H  | -2.60264200 | 4.63842300  | -0.36915100 |
| H  | -1.03693700 | 4.85081800  | 0.40890700  |
| C  | -3.89891000 | -0.34443400 | -0.24688100 |
| H  | -3.98195600 | 0.44848600  | -0.99396400 |
| H  | -4.89759400 | -0.62368600 | 0.10038300  |
| H  | -3.32799000 | 0.03063000  | 0.60885200  |
| C  | -4.02031200 | -2.16692600 | -1.97922800 |
| H  | -5.00730800 | -2.45540900 | -1.60695300 |
| H  | -4.13488500 | -1.44602600 | -2.79235100 |
| H  | -3.51776700 | -3.05111300 | -2.38133400 |
| O  | -3.11811100 | -2.50435700 | 0.24695400  |
| H  | -2.59112600 | -3.24488200 | -0.07940800 |
| Cu | 1.27645900  | -0.65609100 | -1.47338300 |
| Br | 3.44039100  | 0.03781700  | -0.74163700 |
| N  | 0.64130700  | -0.35090200 | 1.81841500  |
| C  | 1.79810300  | -1.10833800 | 2.36223800  |
| C  | -0.61374000 | -1.13975600 | 1.89826800  |
| C  | 1.16526200  | -2.40958400 | 2.75836300  |
| C  | -0.14028500 | -2.42146000 | 2.51280700  |
| H  | -1.01428100 | -1.27310800 | 0.88545800  |
| H  | -1.35031100 | -0.60697000 | 2.51007300  |
| H  | -0.82479200 | -3.23982700 | 2.69408100  |
| H  | 1.74653400  | -3.21963400 | 3.17905200  |
| H  | 2.55275600  | -1.19144300 | 1.56909700  |
| H  | 2.23066700  | -0.55836800 | 3.20473800  |

TS1

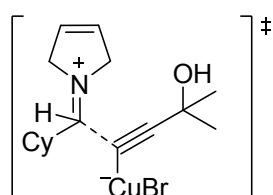

|    |             |             |             |
|----|-------------|-------------|-------------|
| C  | 0.24862900  | -0.64701800 | 0.76714000  |
| C  | -0.02152800 | 0.84473600  | -0.77794700 |
| C  | 0.95373100  | 1.56626600  | -0.98649800 |
| C  | 2.09896500  | 2.45889000  | -1.25427400 |
| H  | -0.71041700 | -1.14569700 | 0.62301000  |
| C  | 1.45278500  | -1.39080700 | 0.26101900  |
| C  | 1.75067400  | -2.52443500 | 1.26951000  |
| C  | 1.23778300  | -1.97559900 | -1.13897200 |
| H  | 2.30995500  | -0.70593600 | 0.23628600  |
| C  | 2.96225000  | -3.34566200 | 0.82435400  |
| H  | 0.86964400  | -3.17782800 | 1.33422000  |
| H  | 1.91154200  | -2.10905000 | 2.27028500  |
| C  | 2.44573700  | -2.80435300 | -1.57755900 |
| H  | 0.34013200  | -2.61088300 | -1.12145800 |
| H  | 1.04588200  | -1.16662100 | -1.84703500 |
| C  | 2.75800500  | -3.91885000 | -0.57810900 |
| H  | 3.14650600  | -4.14648400 | 1.54715200  |
| H  | 3.85203400  | -2.70186800 | 0.82806400  |
| H  | 2.26450800  | -3.22119800 | -2.57270600 |
| H  | 3.31891200  | -2.14264800 | -1.66616500 |
| H  | 3.64428200  | -4.47906500 | -0.89175400 |
| H  | 1.92145600  | -4.62991700 | -0.55784900 |
| C  | 3.35445100  | 1.64850300  | -1.57243100 |
| H  | 3.18926000  | 1.01351900  | -2.44562900 |
| H  | 4.18311200  | 2.33311700  | -1.77073300 |
| H  | 3.62279700  | 1.02057800  | -0.71861900 |
| C  | 1.75017500  | 3.40479000  | -2.40865500 |
| H  | 2.58938200  | 4.08430200  | -2.57851300 |
| H  | 1.54470300  | 2.84281800  | -3.32240300 |
| H  | 0.86036300  | 3.99101700  | -2.16288600 |
| O  | 2.42170700  | 3.21415500  | -0.08500600 |
| H  | 1.62064300  | 3.68204700  | 0.18387500  |
| Cu | -1.93952900 | 0.30583200  | -0.86840300 |
| Br | -4.04501100 | -0.58675100 | -0.36235900 |
| N  | 0.30896000  | 0.10120600  | 1.85323100  |
| C  | -0.91140900 | 0.66932700  | 2.44750300  |
| C  | 1.50297400  | 0.87098100  | 2.21748100  |
| C  | -0.36623700 | 1.76838400  | 3.31176500  |

|   |             |             |            |
|---|-------------|-------------|------------|
| C | 0.95268200  | 1.87702900  | 3.18832200 |
| H | 1.92095900  | 1.35756300  | 1.32094700 |
| H | 2.27141800  | 0.22090800  | 2.65294100 |
| H | 1.58783200  | 2.59376300  | 3.69318600 |
| H | -1.00454900 | 2.38090700  | 3.93552600 |
| H | -1.56830400 | 1.04578500  | 1.64714300 |
| H | -1.46470800 | -0.09676900 | 3.00092300 |

**Int4**

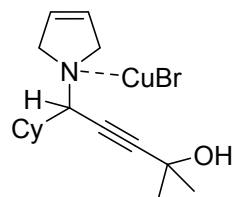

|   |             |             |             |
|---|-------------|-------------|-------------|
| C | -1.42809600 | 0.37146300  | -1.30734800 |
| H | -1.93246000 | 0.57435500  | -2.26783300 |
| C | -0.37142700 | -0.63730900 | -1.48782900 |
| C | 0.63128400  | -1.31417900 | -1.47341900 |
| N | -0.72019000 | 1.60339600  | -0.86799400 |
| C | 0.15856000  | 2.17125000  | -1.93263000 |
| H | 1.10591800  | 1.62791500  | -1.98622600 |
| H | -0.33151400 | 2.08768100  | -2.91864300 |
| C | -1.60183400 | 2.72198500  | -0.45594300 |
| H | -1.93840900 | 2.59278500  | 0.57628100  |
| H | -2.49584100 | 2.77303100  | -1.10205100 |
| C | -0.72120500 | 3.92255600  | -0.68109800 |
| C | 0.26873600  | 3.61197800  | -1.51343400 |
| C | 1.92196800  | -2.05272300 | -1.41591700 |
| H | -0.91755700 | 4.89158600  | -0.23975100 |
| H | 1.03630600  | 4.27937500  | -1.88414200 |
| O | 2.96683100  | -1.12045200 | -1.22010200 |
| H | 2.94906300  | -0.82137700 | -0.29434700 |
| C | 2.19303000  | -2.72590300 | -2.75922500 |
| H | 2.25793800  | -1.97134800 | -3.54569400 |
| H | 3.14742200  | -3.25417000 | -2.69905400 |
| H | 1.39936900  | -3.43528300 | -3.00493700 |
| C | 1.87547400  | -3.07393500 | -0.27646800 |
| H | 1.71081000  | -2.56542400 | 0.67822600  |
| H | 1.07464200  | -3.80110000 | -0.43545100 |
| H | 2.83391200  | -3.59814000 | -0.23522700 |
| C | -2.50463000 | -0.09483700 | -0.30433800 |
| C | -3.20551900 | -1.34578700 | -0.85193300 |
| C | -1.96452400 | -0.35739900 | 1.10662200  |
| H | -3.25675700 | 0.70610500  | -0.24320600 |

|    |             |             |             |
|----|-------------|-------------|-------------|
| C  | -4.30963600 | -1.83007400 | 0.08839400  |
| H  | -2.45599700 | -2.13910300 | -0.97332800 |
| H  | -3.61339900 | -1.13748800 | -1.84851900 |
| C  | -3.06688400 | -0.85389100 | 2.04546800  |
| H  | -1.16299500 | -1.10820400 | 1.04974400  |
| H  | -1.51940100 | 0.55256000  | 1.53209000  |
| C  | -3.75431500 | -2.10017100 | 1.48733200  |
| H  | -4.77691700 | -2.73104100 | -0.32124100 |
| H  | -5.09580800 | -1.06532500 | 0.15243900  |
| H  | -2.64203200 | -1.05576100 | 3.03314000  |
| H  | -3.81395100 | -0.05890500 | 2.17680500  |
| H  | -4.55330100 | -2.42813100 | 2.15969100  |
| H  | -3.02482100 | -2.91933900 | 1.43328700  |
| Cu | 0.68643600  | 0.94550800  | 0.53663100  |
| Br | 2.36257000  | 0.16704900  | 1.99637200  |

**Int5**

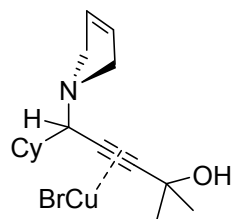

|    |             |             |             |
|----|-------------|-------------|-------------|
| C  | -1.56610600 | -0.03942100 | -0.64685700 |
| H  | -1.36065500 | -0.43419700 | -1.65060000 |
| C  | -0.31483800 | 0.60544000  | -0.13348000 |
| C  | 0.46382300  | 1.43607500  | 0.31895900  |
| N  | -2.57338100 | 1.00012500  | -0.77982300 |
| C  | -2.27066400 | 1.99105700  | -1.82829000 |
| H  | -1.21904000 | 1.92928500  | -2.15192200 |
| H  | -2.89389600 | 1.82552200  | -2.71650600 |
| C  | -2.91310200 | 1.69828600  | 0.47526900  |
| H  | -2.16999700 | 1.51446700  | 1.26651600  |
| H  | -3.88724400 | 1.36734400  | 0.85839800  |
| C  | -2.91416000 | 3.15218900  | 0.09439000  |
| C  | -2.55262300 | 3.31513600  | -1.17628800 |
| C  | 1.17467500  | 2.63632500  | 0.85139700  |
| H  | -2.48446300 | 4.25826600  | -1.70657400 |
| H  | -3.18743400 | 3.93857800  | 0.78913900  |
| Cu | 1.64758500  | -0.32121600 | -0.21032000 |
| Br | 3.57552600  | -1.58476200 | -0.48823700 |
| C  | 1.99189600  | 3.27678500  | -0.27307200 |
| H  | 2.46429000  | 4.18477900  | 0.10896700  |
| H  | 2.76537000  | 2.59261700  | -0.63438200 |

|   |             |             |             |
|---|-------------|-------------|-------------|
| H | 1.34271700  | 3.54061800  | -1.11385000 |
| O | 0.18772700  | 3.52692500  | 1.33862100  |
| H | -0.43274900 | 3.72018600  | 0.62026000  |
| C | 2.05285000  | 2.26276100  | 2.04101600  |
| H | 2.83416200  | 1.55907100  | 1.73918300  |
| H | 2.51807800  | 3.17079100  | 2.43136700  |
| H | 1.44313600  | 1.81191600  | 2.82637000  |
| C | -2.03002900 | -1.21925900 | 0.22255400  |
| C | -3.29362000 | -1.83742700 | -0.38560300 |
| C | -0.92638100 | -2.27271500 | 0.37443800  |
| H | -2.27330900 | -0.83344400 | 1.22436400  |
| C | -3.77094300 | -3.04968200 | 0.41516100  |
| H | -3.06227800 | -2.15348600 | -1.41392100 |
| H | -4.07632300 | -1.07730100 | -0.46052600 |
| C | -1.41080600 | -3.49608800 | 1.15814600  |
| H | -0.58849700 | -2.58865400 | -0.62454900 |
| H | -0.05436200 | -1.84383300 | 0.88617900  |
| C | -2.66679800 | -4.10085700 | 0.53128600  |
| H | -4.66309100 | -3.47739500 | -0.05309500 |
| H | -4.06696100 | -2.72461100 | 1.42197400  |
| H | -0.60795500 | -4.23697000 | 1.21449500  |
| H | -1.63539500 | -3.19101000 | 2.18913100  |
| H | -3.01042300 | -4.95565000 | 1.12236500  |
| H | -2.42423200 | -4.48286300 | -0.46955900 |

**TS2\_1**

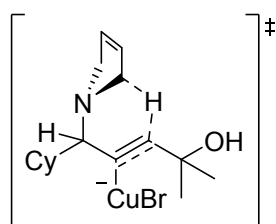

|   |             |             |             |
|---|-------------|-------------|-------------|
| C | -1.27307400 | -0.38183400 | -0.73217800 |
| H | -0.94220400 | -0.82838500 | -1.67613900 |
| C | -0.17241000 | 0.49863800  | -0.13679200 |
| C | -0.42476800 | 1.55340600  | 0.54466300  |
| N | -2.39916200 | 0.48865400  | -1.05332300 |
| C | -2.31443800 | 1.22548000  | -2.32181900 |
| H | -1.26615900 | 1.47427200  | -2.55262700 |
| H | -2.70522500 | 0.61344300  | -3.14271900 |
| C | -2.86737400 | 1.34591900  | -0.07601700 |
| H | -1.75959200 | 1.79034800  | 0.48877400  |
| H | -3.34150000 | 0.90277200  | 0.79957600  |
| C | 0.10145600  | 2.67477200  | 1.39522300  |

|    |             |             |             |
|----|-------------|-------------|-------------|
| C  | -3.44630800 | 2.52150400  | -0.76605200 |
| C  | -3.11467400 | 2.46463500  | -2.05744500 |
| H  | -3.99427000 | 3.30245200  | -0.25692900 |
| H  | -3.35536900 | 3.19118800  | -2.82265600 |
| C  | 1.62825500  | 2.73289700  | 1.29035800  |
| H  | 2.08804300  | 1.82115900  | 1.68178600  |
| H  | 1.94252000  | 2.84740200  | 0.24779000  |
| H  | 1.98441800  | 3.59077700  | 1.86674100  |
| Cu | 1.77433100  | -0.04882000 | -0.36283300 |
| Br | 4.00276800  | -0.70008600 | -0.61125800 |
| C  | -0.34637000 | 2.48540300  | 2.84131400  |
| H  | -1.43812800 | 2.46372400  | 2.89753500  |
| H  | 0.05261800  | 1.55320500  | 3.24637500  |
| H  | 0.01230800  | 3.32629100  | 3.43963600  |
| O  | -0.48235600 | 3.89889600  | 0.97433600  |
| H  | -0.17521600 | 4.07884400  | 0.07705200  |
| C  | -1.65776400 | -1.51898500 | 0.22801600  |
| C  | -2.76394700 | -2.38864700 | -0.38288500 |
| C  | -0.43920700 | -2.37546400 | 0.59501100  |
| H  | -2.03615200 | -1.06150400 | 1.15650800  |
| C  | -3.14517800 | -3.55002700 | 0.53650800  |
| H  | -2.39689500 | -2.79216500 | -1.33832900 |
| H  | -3.63878500 | -1.77255300 | -0.61475900 |
| C  | -0.82444200 | -3.54606900 | 1.50164500  |
| H  | 0.01870600  | -2.75846300 | -0.32970300 |
| H  | 0.32001500  | -1.76120600 | 1.09073000  |
| C  | -1.92398300 | -4.40496600 | 0.87668100  |
| H  | -3.92357200 | -4.15781900 | 0.06425200  |
| H  | -3.57558900 | -3.14967800 | 1.46465400  |
| H  | 0.06197800  | -4.14910100 | 1.71921800  |
| H  | -1.18165700 | -3.14939500 | 2.46189300  |
| H  | -2.20286300 | -5.22038000 | 1.55158400  |
| H  | -1.54155900 | -4.86816500 | -0.04285100 |

TS2\_2

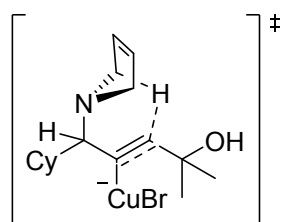

|   |             |             |             |
|---|-------------|-------------|-------------|
| C | 0.13713900  | -1.57372400 | -0.68921400 |
| H | 0.13334100  | -1.93748800 | -1.72647400 |
| C | -0.67697800 | -0.26955200 | -0.67510000 |

|    |             |             |             |
|----|-------------|-------------|-------------|
| C  | -1.95764700 | -0.26582500 | -0.64273900 |
| N  | -0.61861500 | -2.53351500 | 0.10439900  |
| C  | -1.91774800 | -2.78237000 | -0.29271300 |
| H  | -2.38471700 | -1.55976700 | -0.55924900 |
| H  | -2.06203800 | -3.23668600 | -1.27248800 |
| C  | -0.61891500 | -2.35165200 | 1.56405300  |
| H  | -0.59016900 | -1.27478100 | 1.80891700  |
| H  | 0.25616500  | -2.82376400 | 2.02205100  |
| C  | -1.92423800 | -2.95591700 | 1.98322100  |
| C  | -2.66590800 | -3.22209100 | 0.90507200  |
| C  | -3.22667200 | 0.54600900  | -0.62356200 |
| H  | -3.66446500 | -3.63632700 | 0.87123600  |
| H  | -2.19488300 | -3.12442300 | 3.01741600  |
| Cu | 0.14841900  | 1.51327000  | -0.13144600 |
| Br | 1.13836900  | 3.45020100  | 0.72563900  |
| C  | -2.92444900 | 2.00938300  | -0.95721700 |
| H  | -3.87067500 | 2.55372100  | -1.01809200 |
| H  | -2.29790600 | 2.47516100  | -0.19022200 |
| H  | -2.40209700 | 2.08787900  | -1.91591000 |
| O  | -4.14031300 | -0.00450200 | -1.56033300 |
| H  | -3.79101500 | 0.16156700  | -2.44476900 |
| C  | -3.89949900 | 0.41822800  | 0.73944700  |
| H  | -3.23987800 | 0.79897700  | 1.52317100  |
| H  | -4.82985700 | 0.99127700  | 0.73775500  |
| H  | -4.13286200 | -0.62937700 | 0.94736800  |
| C  | 1.59317300  | -1.43907700 | -0.23831600 |
| C  | 2.28511900  | -2.80360400 | -0.11483900 |
| C  | 2.39258500  | -0.56434200 | -1.21470100 |
| H  | 1.60281200  | -0.94024900 | 0.74517600  |
| C  | 3.72819400  | -2.64567800 | 0.36915000  |
| H  | 2.27932800  | -3.28524900 | -1.10388500 |
| H  | 1.72839300  | -3.46942500 | 0.55187900  |
| C  | 3.83576800  | -0.38523000 | -0.74210300 |
| H  | 2.38563100  | -1.05176600 | -2.20145900 |
| H  | 1.92281700  | 0.41712600  | -1.34625800 |
| C  | 4.53101500  | -1.73582600 | -0.56192000 |
| H  | 4.20470900  | -3.62775300 | 0.45206100  |
| H  | 3.71841000  | -2.21123000 | 1.37815300  |
| H  | 4.38445400  | 0.23675100  | -1.45560000 |
| H  | 3.83016900  | 0.16085900  | 0.21028900  |
| H  | 5.54488400  | -1.59481200 | -0.17441800 |
| H  | 4.62955700  | -2.22386900 | -1.54130500 |

## Int6\_1

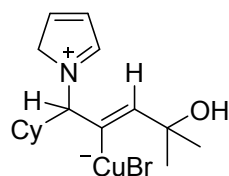

|    |             |             |             |
|----|-------------|-------------|-------------|
| C  | 1.14224800  | 0.33157900  | -0.57767400 |
| H  | 0.72459200  | 0.75867900  | -1.49752000 |
| C  | 0.16078800  | -0.67945700 | 0.02237200  |
| C  | 0.63322700  | -1.76559600 | 0.63577200  |
| N  | 2.36155900  | -0.38119400 | -1.03190600 |
| C  | 2.32364400  | -1.15690200 | -2.26755500 |
| H  | 1.39630000  | -1.74537900 | -2.26385300 |
| H  | 2.30618800  | -0.48322200 | -3.13202200 |
| C  | 3.37854600  | -0.75554800 | -0.31364300 |
| H  | 1.71124700  | -2.01186900 | 0.67657500  |
| H  | 3.56586900  | -0.32255200 | 0.66174800  |
| C  | -0.14161500 | -2.84438500 | 1.37250000  |
| C  | 4.16405500  | -1.75630000 | -1.01146400 |
| C  | 3.54748900  | -2.00210700 | -2.18192900 |
| H  | 5.07106800  | -2.19966600 | -0.62692800 |
| H  | 3.85612600  | -2.69094400 | -2.95665900 |
| C  | -1.65610600 | -2.68797800 | 1.30652600  |
| H  | -1.98591600 | -1.75496100 | 1.77298400  |
| H  | -2.00855200 | -2.68336200 | 0.26856100  |
| H  | -2.12515000 | -3.52711900 | 1.82710600  |
| Cu | -1.75770500 | -0.12160700 | -0.29592400 |
| Br | -3.88712900 | 0.72369300  | -0.82562600 |
| C  | 0.32753600  | -2.88746400 | 2.82509300  |
| H  | 1.40895900  | -3.04790000 | 2.86630900  |
| H  | 0.08808000  | -1.94877600 | 3.33095100  |
| H  | -0.16131700 | -3.71430100 | 3.34707600  |
| O  | 0.23646100  | -4.11418300 | 0.82954500  |
| H  | -0.12335100 | -4.15020900 | -0.06479600 |
| C  | 1.50057900  | 1.49055700  | 0.36765600  |
| C  | 2.47125500  | 2.48053100  | -0.29353200 |
| C  | 0.23255100  | 2.22378500  | 0.83258600  |
| H  | 1.96964000  | 1.05869100  | 1.26710800  |
| C  | 2.80461300  | 3.65742600  | 0.62542100  |
| H  | 1.99769700  | 2.86207400  | -1.21000200 |
| H  | 3.39543200  | 1.97934200  | -0.60505900 |
| C  | 0.56752500  | 3.41238700  | 1.73653000  |
| H  | -0.32293700 | 2.57252900  | -0.05080800 |
| H  | -0.42540800 | 1.52829300  | 1.35968900  |



|   |             |            |            |
|---|-------------|------------|------------|
| C | 1.53455900  | 4.38534000 | 1.06399000 |
| H | 3.49022500  | 4.34299700 | 0.11712700 |
| H | 3.33108400  | 3.28240000 | 1.51421400 |
| H | -0.35758800 | 3.92230900 | 2.02049200 |
| H | 1.02106400  | 3.03871700 | 2.66503500 |
| H | 1.78142100  | 5.21056900 | 1.73930900 |
| H | 1.05023100  | 4.82760100 | 0.18313400 |

**Int6\_2**

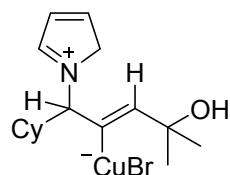

|    |             |             |             |
|----|-------------|-------------|-------------|
| C  | 1.34706400  | 0.13876700  | -0.56933200 |
| H  | 1.24208500  | 0.39457500  | -1.63384600 |
| C  | 0.17625800  | -0.73302500 | -0.15955700 |
| C  | 0.34007300  | -2.04399000 | 0.04876900  |
| N  | 2.62502700  | -0.63670000 | -0.49702000 |
| C  | 3.10271300  | -1.40614800 | -1.42396000 |
| H  | 1.30579100  | -2.56832600 | -0.03678000 |
| H  | 2.69598400  | -1.37526200 | -2.42926700 |
| C  | 3.27711400  | -0.94271800 | 0.77301100  |
| H  | 2.50704500  | -1.33071000 | 1.45481800  |
| H  | 3.70731700  | -0.03615100 | 1.21181700  |
| C  | 4.28693300  | -1.97097000 | 0.40015700  |
| C  | 4.16988300  | -2.24476800 | -0.91264800 |
| C  | -0.74729900 | -3.03967800 | 0.45268900  |
| H  | 4.73815700  | -2.94751500 | -1.50436200 |
| H  | 4.97942000  | -2.41034600 | 1.10546800  |
| Cu | -1.68007500 | 0.07918900  | -0.19636300 |
| Br | -3.83449500 | 1.03150300  | -0.25599900 |
| C  | -1.83571600 | -3.17110200 | -0.61488000 |
| H  | -2.52887600 | -3.96811600 | -0.33065400 |
| H  | -2.40366400 | -2.24316500 | -0.73213100 |
| H  | -1.39233000 | -3.41420200 | -1.58795800 |
| O  | -0.13182900 | -4.31670300 | 0.65255700  |
| H  | 0.04043100  | -4.69019500 | -0.21961000 |
| C  | -1.35740500 | -2.67340900 | 1.80195800  |
| H  | -1.84510600 | -1.69586600 | 1.74849900  |
| H  | -2.09520900 | -3.42660400 | 2.09126000  |
| H  | -0.57522200 | -2.63494600 | 2.56525400  |
| C  | 1.56344800  | 1.46054800  | 0.20226000  |
| C  | 2.76705500  | 2.22640700  | -0.37647200 |

|   |             |            |             |
|---|-------------|------------|-------------|
| C | 0.32153300  | 2.36091000 | 0.18400600  |
| H | 1.76419100  | 1.21244900 | 1.25743200  |
| C | 3.01580600  | 3.55570900 | 0.33760500  |
| H | 2.56101400  | 2.42491400 | -1.43897400 |
| H | 3.67953800  | 1.61656700 | -0.35208200 |
| C | 0.57450900  | 3.70198000 | 0.87724700  |
| H | 0.01033000  | 2.53063100 | -0.85742300 |
| H | -0.51246200 | 1.86532400 | 0.68496300  |
| C | 1.77197500  | 4.44057600 | 0.28393300  |
| H | 3.87569500  | 4.06225800 | -0.11248700 |
| H | 3.27571000  | 3.35938600 | 1.38717400  |
| H | -0.33069000 | 4.31246200 | 0.81512500  |
| H | 0.75917700  | 3.51983500 | 1.94489600  |
| H | 1.94806700  | 5.38106900 | 0.81533500  |
| H | 1.55891100  | 4.69886000 | -0.76199200 |

**Int7**

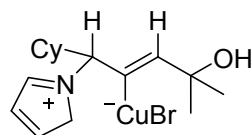

|   |             |             |             |
|---|-------------|-------------|-------------|
| C | -0.99589900 | 0.45120800  | 0.98858700  |
| H | -1.41402700 | 1.09826300  | 1.77793300  |
| C | 0.19789300  | 1.09225100  | 0.28177300  |
| C | 0.45782800  | 2.35306300  | 0.64208300  |
| N | -0.44358200 | -0.72507300 | 1.71683300  |
| C | 0.37171000  | -0.52902600 | 2.90883800  |
| H | 1.09327000  | 0.27007100  | 2.68409200  |
| H | -0.25352000 | -0.20819000 | 3.74925100  |
| C | -0.23561000 | -1.91393600 | 1.23331300  |
| H | -0.16003400 | 2.88344200  | 1.38093500  |
| H | -0.67913800 | -2.24377300 | 0.30106900  |
| C | 0.65743900  | -2.67166200 | 2.08901500  |
| C | 1.01850000  | -1.85824900 | 3.09748900  |
| C | 1.55244500  | 3.24669100  | 0.10444100  |
| H | 0.97429700  | -3.68290900 | 1.88121600  |
| H | 1.68067400  | -2.08736100 | 3.92160500  |
| O | 2.10503000  | 3.86880400  | 1.26817200  |
| H | 2.76618000  | 4.50520300  | 0.97010600  |
| C | 2.64811300  | 2.49709300  | -0.64714100 |
| H | 2.26161100  | 2.03172600  | -1.55907400 |
| H | 3.44109400  | 3.19574000  | -0.93849000 |
| H | 3.08214700  | 1.71983100  | -0.01208500 |
| C | 0.92262900  | 4.31885000  | -0.79258200 |

|    |             |             |             |
|----|-------------|-------------|-------------|
| H  | 1.68394200  | 5.02850000  | -1.13913300 |
| H  | 0.45480300  | 3.86270800  | -1.66948000 |
| H  | 0.16214900  | 4.87302400  | -0.23565400 |
| Cu | 1.20642800  | -0.26563800 | -0.81660000 |
| Br | 1.86279800  | -2.49961600 | -1.36273000 |
| C  | -2.13379100 | 0.03825900  | 0.04873600  |
| C  | -3.28788400 | -0.65865900 | 0.78311400  |
| C  | -2.64967200 | 1.27990800  | -0.69087000 |
| H  | -1.72144600 | -0.64085000 | -0.71508500 |
| C  | -4.43055000 | -1.01339700 | -0.17103600 |
| H  | -3.66436700 | 0.02304400  | 1.55988700  |
| H  | -2.94188300 | -1.56063100 | 1.30129500  |
| C  | -3.79711900 | 0.92957300  | -1.63950700 |
| H  | -2.99607700 | 2.01276400  | 0.05373000  |
| H  | -1.82398000 | 1.74826700  | -1.23339800 |
| C  | -4.93956200 | 0.22850700  | -0.90313400 |
| H  | -5.24311800 | -1.49587500 | 0.38150600  |
| H  | -4.06946900 | -1.74424900 | -0.90719100 |
| H  | -4.15926200 | 1.83609400  | -2.13455700 |
| H  | -3.41745900 | 0.26738600  | -2.42915100 |
| H  | -5.73741400 | -0.04202800 | -1.60202000 |
| H  | -5.37730600 | 0.92209800  | -0.17228900 |

**TS3**

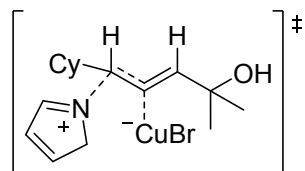

|   |             |             |            |
|---|-------------|-------------|------------|
| C | -1.10087900 | 0.69337900  | 1.17100900 |
| H | -1.43465200 | 0.83855200  | 2.20156500 |
| C | 0.12195200  | 1.21099600  | 0.75642300 |
| C | 0.58803400  | 2.46322900  | 0.76119600 |
| N | -0.59681400 | -1.29125500 | 1.78183100 |
| C | 0.47408700  | -1.36297700 | 2.76209700 |
| H | 1.14057600  | -0.50068300 | 2.61367400 |
| H | 0.05900500  | -1.29153100 | 3.77500700 |
| C | -0.52924900 | -2.35079300 | 1.05044700 |
| H | -0.04074300 | 3.31302200  | 1.04294500 |
| H | -1.20192600 | -2.50629200 | 0.20941900 |
| C | 0.55009500  | -3.25420000 | 1.45436500 |
| C | 1.16253600  | -2.66430000 | 2.49347700 |
| C | 1.96398400  | 2.89941100  | 0.29455200 |
| H | 0.79908300  | -4.18061600 | 0.95702800 |

|    |             |             |             |
|----|-------------|-------------|-------------|
| H  | 2.01569000  | -3.02903500 | 3.05054400  |
| O  | 2.10770100  | 4.21183600  | 0.83227700  |
| H  | 2.95279300  | 4.56219100  | 0.52788800  |
| C  | 3.07516900  | 1.99994200  | 0.83809800  |
| H  | 2.99966000  | 0.97474000  | 0.45957900  |
| H  | 4.05171100  | 2.38697800  | 0.52666400  |
| H  | 3.03606300  | 1.97815300  | 1.92992300  |
| C  | 2.00987700  | 2.96221400  | -1.23644000 |
| H  | 2.97261000  | 3.36592200  | -1.57163800 |
| H  | 1.89048100  | 1.96611700  | -1.67620700 |
| H  | 1.21061200  | 3.60838100  | -1.60917900 |
| Cu | 1.03637500  | -0.20696100 | -0.44280000 |
| Br | 1.61774300  | -2.04608600 | -1.79990000 |
| C  | -2.19411400 | 0.36165700  | 0.18471800  |
| C  | -3.40637600 | -0.31859700 | 0.82721700  |
| C  | -2.62015400 | 1.67703300  | -0.50281700 |
| H  | -1.77575200 | -0.29103200 | -0.59593900 |
| C  | -4.51032300 | -0.57101500 | -0.20183700 |
| H  | -3.79378900 | 0.33976600  | 1.61848600  |
| H  | -3.10322900 | -1.25071800 | 1.31316800  |
| C  | -3.72861300 | 1.42298600  | -1.52636300 |
| H  | -2.97972600 | 2.37901900  | 0.26357000  |
| H  | -1.74967100 | 2.13813700  | -0.97871500 |
| C  | -4.93229000 | 0.72919400  | -0.88819300 |
| H  | -5.36918300 | -1.04778600 | 0.28080900  |
| H  | -4.14060100 | -1.27597400 | -0.95899300 |
| H  | -4.02932600 | 2.37009500  | -1.98534500 |
| H  | -3.32976500 | 0.79119100  | -2.33094900 |
| H  | -5.70117500 | 0.53164900  | -1.64163400 |
| H  | -5.38092200 | 1.39976300  | -0.14269500 |

**Int8**

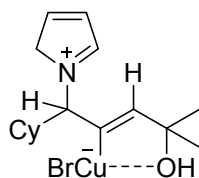

|   |            |             |             |
|---|------------|-------------|-------------|
| C | 1.39707500 | 0.02550500  | -0.55420000 |
| H | 1.20607600 | 0.43136100  | -1.55589500 |
| C | 0.12918700 | -0.57462800 | 0.00190500  |
| C | 0.10961700 | -1.75828200 | 0.61399000  |
| N | 2.39003500 | -1.06095800 | -0.78964900 |
| C | 2.26912500 | -1.90335900 | -1.97527000 |
| H | 1.21170700 | -2.18290000 | -2.08003200 |

|    |             |             |             |
|----|-------------|-------------|-------------|
| H  | 2.57162100  | -1.33959000 | -2.86536900 |
| C  | 3.13635500  | -1.65670100 | 0.09337600  |
| H  | 0.98436800  | -2.42673600 | 0.71786600  |
| H  | 3.31391100  | -1.21277300 | 1.06572200  |
| C  | -1.15467200 | -2.36511900 | 1.20711600  |
| C  | 3.65369300  | -2.90871400 | -0.42824700 |
| C  | 3.14749900  | -3.06661700 | -1.66506100 |
| H  | 4.31991100  | -3.56709000 | 0.11053300  |
| H  | 3.31954300  | -3.88724500 | -2.34823200 |
| C  | -0.81944500 | -3.16925300 | 2.46394400  |
| H  | -0.12378700 | -3.98424100 | 2.23760800  |
| H  | -0.36583900 | -2.51284100 | 3.21076800  |
| H  | -1.72898400 | -3.60211400 | 2.89077400  |
| Cu | -1.68158700 | 0.33319200  | -0.20780700 |
| Br | -3.78270700 | 1.28511700  | -0.76072200 |
| C  | -1.83323300 | -3.24503500 | 0.15414200  |
| H  | -2.11233100 | -2.62769800 | -0.70531000 |
| H  | -1.16042400 | -4.03868900 | -0.18529400 |
| H  | -2.73351300 | -3.71967500 | 0.56302300  |
| O  | -2.02344300 | -1.29362600 | 1.56713800  |
| H  | -2.94313000 | -1.56906200 | 1.46944400  |
| C  | 2.00458400  | 1.14969500  | 0.30213400  |
| C  | 3.28037000  | 1.71443200  | -0.34034100 |
| C  | 0.97627800  | 2.27011100  | 0.52167800  |
| H  | 2.24599700  | 0.73347300  | 1.29378300  |
| C  | 3.86646400  | 2.87575500  | 0.46485700  |
| H  | 3.02414100  | 2.07080900  | -1.34914200 |
| H  | 4.03751700  | 0.93154600  | -0.46808700 |
| C  | 1.57165500  | 3.43481100  | 1.31487400  |
| H  | 0.62735800  | 2.62763700  | -0.45837800 |
| H  | 0.09931500  | 1.87143500  | 1.03721800  |
| C  | 2.83375900  | 3.98638400  | 0.65330300  |
| H  | 4.76292700  | 3.25849700  | -0.03363100 |
| H  | 4.18425900  | 2.50733700  | 1.45008100  |
| H  | 0.81829000  | 4.22002300  | 1.42627200  |
| H  | 1.81889500  | 3.08879700  | 2.32798600  |
| H  | 3.25564300  | 4.80233400  | 1.24868900  |
| H  | 2.57474100  | 4.40756600  | -0.32747900 |

TS4

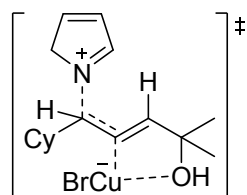

|    |             |             |             |
|----|-------------|-------------|-------------|
| C  | 1.16950000  | 0.30208000  | -0.54510900 |
| H  | 1.02216800  | 0.53133900  | -1.60465800 |
| C  | 0.30003600  | -0.66115700 | -0.01461300 |
| C  | 0.46173800  | -1.86241100 | 0.52315900  |
| N  | 2.83749900  | -0.55189800 | -0.82535700 |
| C  | 2.85892800  | -1.54600300 | -1.88896900 |
| H  | 1.85267600  | -1.97751000 | -1.97858900 |
| H  | 3.10534600  | -1.06701900 | -2.84431800 |
| C  | 3.65179900  | -0.93765400 | 0.09832700  |
| H  | 1.44531400  | -2.35398500 | 0.56124600  |
| H  | 3.77179700  | -0.36680700 | 1.01531200  |
| C  | -0.67376800 | -2.69240900 | 1.09101200  |
| C  | 4.34363600  | -2.17866100 | -0.25027400 |
| C  | 3.87210500  | -2.55337400 | -1.45178900 |
| H  | 5.08302800  | -2.67451600 | 0.36321000  |
| H  | 4.14962500  | -3.42730300 | -2.02627600 |
| C  | -0.24428300 | -3.35232800 | 2.40122300  |
| H  | 0.61516600  | -4.01159200 | 2.24391500  |
| H  | 0.02681200  | -2.58414700 | 3.12931500  |
| H  | -1.06321200 | -3.94987000 | 2.81329200  |
| Cu | -1.68504400 | -0.04978500 | -0.18145400 |
| Br | -3.80826300 | 0.80143400  | -0.80053300 |
| C  | -1.11201700 | -3.73574100 | 0.06076200  |
| H  | -1.47364700 | -3.22957600 | -0.83905800 |
| H  | -0.27609200 | -4.38584000 | -0.21377300 |
| H  | -1.91187400 | -4.36938800 | 0.46213200  |
| O  | -1.75236800 | -1.79506300 | 1.35383400  |
| H  | -2.59120900 | -2.27153900 | 1.33964300  |
| C  | 1.54546000  | 1.52010100  | 0.28616000  |
| C  | 2.52961800  | 2.43767000  | -0.45092500 |
| C  | 0.28614200  | 2.31362000  | 0.69286200  |
| H  | 2.00696500  | 1.15309600  | 1.21705100  |
| C  | 2.88244400  | 3.67609700  | 0.37432500  |
| H  | 2.05976600  | 2.75581300  | -1.39312900 |
| H  | 3.43652700  | 1.88725200  | -0.71994400 |
| C  | 0.64417200  | 3.55950000  | 1.50432400  |
| H  | -0.26547400 | 2.60165400  | -0.21339800 |
| H  | -0.38002100 | 1.66667100  | 1.27169800  |

|   |             |            |             |
|---|-------------|------------|-------------|
| C | 1.62680300  | 4.45964500 | 0.75683900  |
| H | 3.57828100  | 4.30865200 | -0.18626300 |
| H | 3.40545800  | 3.36334300 | 1.28902600  |
| H | -0.27128300 | 4.10576600 | 1.74980500  |
| H | 1.09426200  | 3.24866000 | 2.45743100  |
| H | 1.88990700  | 5.33062200 | 1.36539700  |
| H | 1.14772900  | 4.83974200 | -0.15530800 |

**Int9**

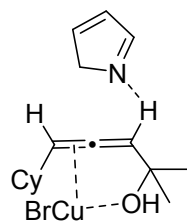

|    |             |             |             |
|----|-------------|-------------|-------------|
| C  | -0.32737000 | 0.23079900  | 1.44289200  |
| H  | -0.17688400 | 0.53130300  | 2.48297800  |
| C  | -0.00932100 | -1.01022800 | 1.09663400  |
| C  | 0.20327300  | -2.26053900 | 0.77011000  |
| N  | -2.85724700 | -2.32079900 | -0.09358000 |
| C  | -4.28370200 | -2.10274200 | 0.10206600  |
| H  | -4.80628400 | -3.06769600 | 0.08786100  |
| H  | -4.45247100 | -1.67288700 | 1.09855400  |
| C  | -2.53520000 | -1.65072400 | -1.14270700 |
| H  | -0.63151300 | -2.95587900 | 0.86240800  |
| H  | -1.50823400 | -1.63729100 | -1.50446100 |
| C  | 1.50054500  | -2.78505200 | 0.18624100  |
| C  | -3.65596600 | -0.92463200 | -1.75833800 |
| C  | -4.73073900 | -1.19082500 | -0.99891700 |
| H  | -3.59970200 | -0.30495000 | -2.64382500 |
| H  | -5.74260700 | -0.83076000 | -1.13424900 |
| C  | 1.36966700  | -2.88233100 | -1.33447400 |
| H  | 0.52772600  | -3.52389900 | -1.60872100 |
| H  | 1.20916100  | -1.88514600 | -1.75704100 |
| H  | 2.27869300  | -3.30897400 | -1.77305000 |
| Cu | 1.77737000  | 0.22915600  | 0.49025900  |
| Br | 3.23341300  | 1.58617800  | -0.80630600 |
| C  | 1.85396000  | -4.13107900 | 0.81234600  |
| H  | 1.96771700  | -4.02030000 | 1.89286600  |
| H  | 1.07229000  | -4.86865500 | 0.61085900  |
| H  | 2.79518100  | -4.50287500 | 0.39668100  |
| O  | 2.51390200  | -1.82930700 | 0.52325500  |
| H  | 3.25653100  | -1.89572500 | -0.09213100 |
| C  | -1.09229500 | 1.20433600  | 0.56571300  |

|   |             |            |             |
|---|-------------|------------|-------------|
| C | -2.56789000 | 1.20338900 | 1.00358500  |
| C | -0.51222400 | 2.62423800 | 0.63809500  |
| H | -1.04010000 | 0.85084700 | -0.47491600 |
| C | -3.39432900 | 2.18728000 | 0.17426800  |
| H | -2.61794200 | 1.48778700 | 2.06487700  |
| H | -2.96864500 | 0.18728900 | 0.92297700  |
| C | -1.34939300 | 3.61060900 | -0.17842300 |
| H | -0.50050200 | 2.93968200 | 1.69227200  |
| H | 0.52602500  | 2.63041000 | 0.28660700  |
| C | -2.81554300 | 3.60024000 | 0.25732400  |
| H | -4.43729200 | 2.17250700 | 0.50891500  |
| H | -3.39491600 | 1.85585700 | -0.87296600 |
| H | -0.92612100 | 4.61535800 | -0.08681900 |
| H | -1.28427900 | 3.33818100 | -1.24045500 |
| H | -3.40273900 | 4.28886400 | -0.35876600 |
| H | -2.88761200 | 3.95881400 | 1.29326000  |

5

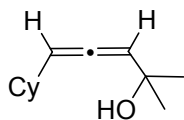

|   |             |             |             |
|---|-------------|-------------|-------------|
| C | 0.22435800  | -0.77728600 | -0.85929800 |
| H | 0.41540300  | -1.00844100 | -1.90907100 |
| C | -0.98930500 | -0.91505600 | -0.39333000 |
| C | -2.20023700 | -1.02659000 | 0.08420000  |
| H | -2.53728100 | -1.96939800 | 0.51343300  |
| C | -3.22208700 | 0.09355900  | 0.12132600  |
| C | -2.83922100 | 1.25064100  | -0.79583000 |
| H | -1.87971400 | 1.68482800  | -0.50270900 |
| H | -2.76300100 | 0.89695500  | -1.82618800 |
| H | -3.60124300 | 2.03612100  | -0.74511900 |
| C | -3.39202900 | 0.56963000  | 1.56760000  |
| H | -3.68190000 | -0.26917300 | 2.20551100  |
| H | -2.46160300 | 0.99830800  | 1.94889500  |
| H | -4.17408200 | 1.33611000  | 1.62665300  |
| O | -4.43392700 | -0.51092600 | -0.32492900 |
| H | -5.12574000 | 0.16017200  | -0.27810300 |
| C | 1.40748000  | -0.30105000 | -0.04997800 |
| C | 2.53435200  | -1.34417300 | -0.06632400 |
| C | 1.91799100  | 1.04514600  | -0.58663900 |
| H | 1.08064800  | -0.15738000 | 0.98930600  |
| C | 3.76777400  | -0.85859100 | 0.69840700  |
| H | 2.81054700  | -1.54247700 | -1.11251600 |
| H | 2.16578600  | -2.28868200 | 0.34735900  |



|   |            |             |             |
|---|------------|-------------|-------------|
| C | 3.15156600 | 1.52912600  | 0.17893200  |
| H | 2.17306900 | 0.92374100  | -1.64961500 |
| H | 1.11320400 | 1.78699200  | -0.53761600 |
| C | 4.26498400 | 0.48053400  | 0.15079300  |
| H | 4.56148900 | -1.61132300 | 0.64916900  |
| H | 3.50920500 | -0.73936200 | 1.75947100  |
| H | 3.50682600 | 2.47719900  | -0.23820900 |
| H | 2.87185400 | 1.72768300  | 1.22272100  |
| H | 5.13175500 | 0.82821500  | 0.72248100  |
| H | 4.60244100 | 0.34199600  | -0.88558300 |

### Int10

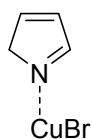

|    |             |             |             |
|----|-------------|-------------|-------------|
| N  | -1.63951300 | -0.08264900 | -0.00003600 |
| C  | -2.45087300 | 1.12906500  | 0.00004100  |
| H  | -2.20287600 | 1.73287300  | 0.88165200  |
| H  | -2.20288600 | 1.73296900  | -0.88151400 |
| C  | -2.44689700 | -1.08908500 | -0.00017300 |
| H  | -2.07243600 | -2.10820600 | -0.00028800 |
| C  | -3.85255600 | -0.69084000 | -0.00019500 |
| C  | -3.86520800 | 0.65272800  | 0.00000100  |
| H  | -4.69380500 | -1.36945200 | -0.00032400 |
| H  | -4.72835600 | 1.30524900  | 0.00005800  |
| Cu | 0.34754000  | -0.05633100 | 0.00000600  |
| Br | 2.65689900  | 0.02592900  | 0.00007000  |

### TS5

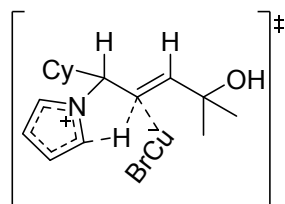

|   |             |             |            |
|---|-------------|-------------|------------|
| C | -1.29062900 | 0.35845700  | 1.18146400 |
| H | -1.81601800 | 1.02873400  | 1.87802100 |
| C | 0.04289800  | 0.96860400  | 0.71549900 |
| C | 0.18491800  | 2.29316800  | 0.59493200 |
| N | -0.83491500 | -0.80859300 | 1.98073500 |
| C | 0.26252300  | -0.50850500 | 2.83957500 |
| H | 0.82627500  | 0.17164900  | 1.88265000 |
| H | 0.09820800  | 0.21627900  | 3.63232000 |
| C | -0.61038300 | -2.01653500 | 1.45577200 |

|    |             |             |             |
|----|-------------|-------------|-------------|
| H  | -0.65075100 | 2.98165900  | 0.76185200  |
| H  | -1.18616200 | -2.38530000 | 0.61751800  |
| C  | 0.46595800  | -2.65216700 | 2.11218100  |
| C  | 0.98087000  | -1.73671100 | 3.00200000  |
| C  | 1.44393800  | 3.00986000  | 0.15275600  |
| H  | 0.82430300  | -3.64771400 | 1.89748400  |
| H  | 1.81161600  | -1.88041700 | 3.67927300  |
| O  | 1.29904700  | 4.32914600  | 0.67310200  |
| H  | 2.04398200  | 4.85176500  | 0.35409400  |
| C  | 2.72086100  | 2.37722300  | 0.70597500  |
| H  | 2.88982500  | 1.37131200  | 0.30872700  |
| H  | 3.58466100  | 2.98762100  | 0.42100900  |
| H  | 2.67368400  | 2.32636000  | 1.79679900  |
| C  | 1.48096700  | 3.05532200  | -1.38018700 |
| H  | 2.33980900  | 3.64601100  | -1.72066000 |
| H  | 1.57329100  | 2.04645800  | -1.79550800 |
| H  | 0.56713000  | 3.51501500  | -1.76654400 |
| Cu | 1.19197400  | -0.37376500 | -0.33763500 |
| Br | 2.30280900  | -1.97785500 | -1.63950700 |
| C  | -2.25515100 | -0.02789700 | 0.05654900  |
| C  | -3.52527400 | -0.70766100 | 0.59306500  |
| C  | -2.63795700 | 1.20734100  | -0.76993300 |
| H  | -1.73072200 | -0.71760700 | -0.62466600 |
| C  | -4.48665000 | -1.07580100 | -0.53929500 |
| H  | -4.02425600 | -0.00794900 | 1.27925400  |
| H  | -3.28062700 | -1.59596800 | 1.18570500  |
| C  | -3.60416300 | 0.84616100  | -1.89917400 |
| H  | -3.10871800 | 1.94794200  | -0.10561000 |
| H  | -1.73784100 | 1.67198600  | -1.18159100 |
| C  | -4.85905000 | 0.15512800  | -1.36624500 |
| H  | -5.38325100 | -1.54929700 | -0.12686200 |
| H  | -4.00700800 | -1.81786700 | -1.19209600 |
| H  | -3.87055100 | 1.74747400  | -2.45977900 |
| H  | -3.09309700 | 0.17552000  | -2.60286200 |
| H  | -5.52123500 | -0.12590400 | -2.19113500 |
| H  | -5.41812100 | 0.85739100  | -0.73281900 |

**Int11**

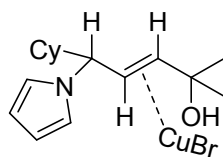

|   |             |            |             |
|---|-------------|------------|-------------|
| C | -1.53527700 | 0.25411600 | -0.32442200 |
| H | -1.35457000 | 0.09001500 | -1.39535100 |

|    |             |             |             |
|----|-------------|-------------|-------------|
| C  | -0.28084800 | 0.84092100  | 0.29264800  |
| C  | 0.57571600  | 1.63661400  | -0.38893300 |
| N  | -2.60778800 | 1.23778600  | -0.24916300 |
| C  | -3.24546000 | 1.79939500  | -1.32439600 |
| H  | -2.96795900 | 1.52170000  | -2.33104000 |
| C  | -3.14590200 | 1.74284700  | 0.90788200  |
| H  | 0.38502200  | 1.83834500  | -1.44575400 |
| H  | -2.77801900 | 1.43138400  | 1.87476600  |
| C  | -4.13746000 | 2.63182600  | 0.56511900  |
| C  | -4.20217600 | 2.66693400  | -0.85323300 |
| C  | 1.69135800  | 2.43779000  | 0.27855200  |
| H  | -4.74611900 | 3.19489900  | 1.25688300  |
| H  | -4.87249500 | 3.25751300  | -1.45957500 |
| O  | 2.13459000  | 1.76468200  | 1.44807000  |
| C  | 2.84795400  | 2.67156800  | -0.69145800 |
| H  | 2.50705300  | 3.21172100  | -1.57934500 |
| H  | 3.61802900  | 3.26933300  | -0.19710500 |
| H  | 3.29383900  | 1.72247800  | -1.00986800 |
| C  | 1.08678000  | 3.76491400  | 0.74241300  |
| H  | 1.86945200  | 4.37799400  | 1.19554900  |
| H  | 0.64598600  | 4.30949000  | -0.09701100 |
| H  | 0.30685800  | 3.57686500  | 1.48432400  |
| Cu | 1.47547000  | -0.43060400 | -0.18821800 |
| Br | 3.66558900  | -1.27690700 | -0.21473500 |
| H  | -0.14861900 | 0.74837800  | 1.37390600  |
| H  | 2.88012800  | 1.18618400  | 1.21902700  |
| C  | -1.96567600 | -1.08449300 | 0.29850600  |
| C  | -3.22787700 | -1.60775800 | -0.39680100 |
| C  | -0.83956900 | -2.12498900 | 0.24308900  |
| H  | -2.20528800 | -0.90099000 | 1.35794300  |
| C  | -3.66456700 | -2.96540100 | 0.15335300  |
| H  | -3.01580200 | -1.70686100 | -1.47256800 |
| H  | -4.03274000 | -0.87243400 | -0.29770900 |
| C  | -1.28574000 | -3.49512000 | 0.76381300  |
| H  | -0.48903800 | -2.22740600 | -0.79788200 |
| H  | 0.01810700  | -1.80072700 | 0.85469800  |
| C  | -2.53727700 | -3.99148600 | 0.04036800  |
| H  | -4.55657000 | -3.31133600 | -0.37774300 |
| H  | -3.94753000 | -2.85294500 | 1.20865000  |
| H  | -0.46431900 | -4.21009400 | 0.66149500  |
| H  | -1.50167000 | -3.40839300 | 1.83686700  |
| H  | -2.85128700 | -4.95598800 | 0.45125100  |
| H  | -2.30276900 | -4.15787800 | -1.01978100 |

Int12

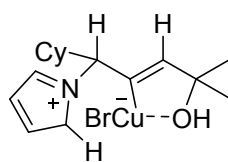

|    |             |             |             |
|----|-------------|-------------|-------------|
| C  | -1.21340800 | 0.20020400  | 0.99351800  |
| H  | -1.71254700 | 0.68999700  | 1.84799500  |
| C  | -0.05582800 | 0.99952300  | 0.41997700  |
| C  | 0.11293400  | 2.25664100  | 0.83530000  |
| N  | -0.59082000 | -1.02212000 | 1.56625400  |
| C  | 0.01639200  | -0.99748200 | 2.88929200  |
| H  | 0.61038700  | -0.07404100 | 2.95652400  |
| H  | -0.75420500 | -0.97976400 | 3.66744200  |
| C  | -0.08997200 | -2.00234700 | 0.87130600  |
| H  | -0.55968200 | 2.76093300  | 1.54444300  |
| H  | -0.32568400 | -2.14888500 | -0.17638500 |
| C  | 0.80554300  | -2.80539100 | 1.68232800  |
| C  | 0.86937100  | -2.22126100 | 2.89197800  |
| C  | 1.23029200  | 3.14372400  | 0.31981300  |
| H  | 1.33484100  | -3.67089200 | 1.31180900  |
| H  | 1.44765200  | -2.54233100 | 3.74791700  |
| O  | 2.19551600  | 2.30033400  | -0.31274300 |
| H  | 2.84684300  | 2.85560000  | -0.75629500 |
| C  | 0.66733500  | 4.12999300  | -0.70740200 |
| H  | -0.12560600 | 4.74095400  | -0.26612500 |
| H  | 1.44924000  | 4.80643100  | -1.07401700 |
| H  | 0.25167500  | 3.57261000  | -1.55082900 |
| C  | 1.89892500  | 3.88159200  | 1.48110600  |
| H  | 2.70106000  | 4.53321100  | 1.11682300  |
| H  | 1.17513400  | 4.50395600  | 2.01613700  |
| H  | 2.32714700  | 3.15845700  | 2.17970100  |
| Cu | 1.37241400  | 0.06712200  | -0.67235400 |
| Br | 2.45009300  | -1.97241300 | -1.38055400 |
| C  | -2.28220800 | -0.15860400 | -0.04632900 |
| C  | -3.36836300 | -1.08597600 | 0.51358000  |
| C  | -2.90767000 | 1.13348400  | -0.58619700 |
| H  | -1.77857400 | -0.65316700 | -0.89160900 |
| C  | -4.45167700 | -1.37750400 | -0.52770000 |
| H  | -3.82843400 | -0.59832500 | 1.38602400  |
| H  | -2.93280800 | -2.02544800 | 0.87326300  |
| C  | -3.99593600 | 0.84269400  | -1.62043900 |
| H  | -3.34354400 | 1.69005200  | 0.25811400  |
| H  | -2.12272800 | 1.76522400  | -1.01090500 |
| C  | -5.07276000 | -0.08278000 | -1.05271000 |

|   |             |             |             |
|---|-------------|-------------|-------------|
| H | -5.22005800 | -2.02726000 | -0.09638900 |
| H | -4.00406600 | -1.92840000 | -1.36599000 |
| H | -4.44002600 | 1.78114400  | -1.96737900 |
| H | -3.53709400 | 0.36676300  | -2.49738900 |
| H | -5.82866300 | -0.30330400 | -1.81320900 |
| H | -5.58971500 | 0.42748800  | -0.22838000 |

**TS6**

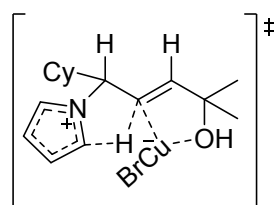

|    |             |             |             |
|----|-------------|-------------|-------------|
| C  | -1.38427700 | 0.20944300  | 1.18432900  |
| H  | -1.93541200 | 0.77036900  | 1.95450700  |
| C  | -0.08077700 | 0.90914000  | 0.78187300  |
| C  | 0.03982800  | 2.23502800  | 0.68266800  |
| N  | -0.88482100 | -1.02404800 | 1.84410600  |
| C  | 0.18006300  | -0.77423000 | 2.76086300  |
| H  | 0.73146600  | 0.02491600  | 1.91769400  |
| H  | -0.04696800 | -0.17884600 | 3.64120200  |
| C  | -0.55805700 | -2.12296900 | 1.15649400  |
| H  | -0.79329700 | 2.92629300  | 0.85335400  |
| H  | -1.08225100 | -2.40391900 | 0.25319900  |
| C  | 0.53904100  | -2.78039900 | 1.75492400  |
| C  | 0.96874900  | -1.97292100 | 2.78139500  |
| C  | 1.32703500  | 2.91177500  | 0.25845200  |
| H  | 0.97260200  | -3.70563700 | 1.40624900  |
| H  | 1.79373700  | -2.15690600 | 3.45598400  |
| O  | 2.34700700  | 1.91258400  | 0.24042900  |
| H  | 3.07402900  | 2.20979400  | -0.31951600 |
| C  | 1.14335400  | 3.48436400  | -1.14980200 |
| H  | 0.31382700  | 4.19664100  | -1.17704000 |
| H  | 2.04904300  | 4.01103700  | -1.47372600 |
| H  | 0.93207700  | 2.67227700  | -1.85159700 |
| C  | 1.71367300  | 4.00487600  | 1.25548000  |
| H  | 2.63585400  | 4.50174800  | 0.93765900  |
| H  | 0.92679700  | 4.76110100  | 1.33183600  |
| H  | 1.87669400  | 3.56388000  | 2.24156500  |
| Cu | 1.34464500  | -0.17398300 | -0.26938700 |
| Br | 2.50678900  | -1.74708600 | -1.61335400 |
| C  | -2.33855100 | -0.08586300 | 0.02273900  |
| C  | -3.54863200 | -0.92097800 | 0.47184900  |
| C  | -2.82357300 | 1.21741100  | -0.62670700 |

|   |             |             |             |
|---|-------------|-------------|-------------|
| H | -1.77670700 | -0.63611200 | -0.74816900 |
| C | -4.50053300 | -1.20488500 | -0.69152300 |
| H | -4.08402100 | -0.35785900 | 1.25029300  |
| H | -3.23207900 | -1.86041100 | 0.93720900  |
| C | -3.78203100 | 0.94145400  | -1.78669500 |
| H | -3.33433500 | 1.82639500  | 0.13514900  |
| H | -1.96591500 | 1.79585000  | -0.98094700 |
| C | -4.97453400 | 0.09389700  | -1.34392700 |
| H | -5.35403600 | -1.79337600 | -0.34022300 |
| H | -3.98009900 | -1.81684300 | -1.44088100 |
| H | -4.12332700 | 1.88800900  | -2.21771000 |
| H | -3.23678300 | 0.41185500  | -2.57917900 |
| H | -5.62763800 | -0.12254100 | -2.19522200 |
| H | -5.57253100 | 0.66261800  | -0.61873900 |

4

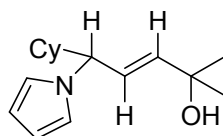

|   |             |             |             |
|---|-------------|-------------|-------------|
| C | -0.26350700 | 0.35198800  | -0.39938800 |
| H | -0.22739600 | 0.22697800  | -1.48934300 |
| C | 1.12113200  | 0.16642500  | 0.16073900  |
| C | 2.17563500  | -0.20619800 | -0.55763500 |
| N | -0.73083300 | 1.71636500  | -0.16536100 |
| C | -1.22820400 | 2.55506300  | -1.12639500 |
| H | -1.19272400 | 2.27222100  | -2.16848100 |
| C | -0.90942200 | 2.29265000  | 1.06536800  |
| H | 2.06916400  | -0.37693200 | -1.63034000 |
| H | -0.59188900 | 1.78889500  | 1.96659300  |
| C | -1.51475400 | 3.51498200  | 0.88576900  |
| C | -1.71738100 | 3.68281800  | -0.50950200 |
| C | 3.56511900  | -0.40737800 | 0.00977100  |
| H | -1.77064900 | 4.21272000  | 1.66938800  |
| H | -2.16223700 | 4.53262800  | -1.00537600 |
| O | 3.54792600  | -0.38585800 | 1.42918800  |
| C | 4.13853500  | -1.73937300 | -0.48316100 |
| H | 4.21453700  | -1.75867100 | -1.57417900 |
| H | 5.13384500  | -1.88957700 | -0.05726400 |
| H | 3.49547300  | -2.57179400 | -0.17619100 |
| C | 4.46435500  | 0.75612800  | -0.40338400 |
| H | 5.47212200  | 0.60085200  | -0.00900100 |
| H | 4.51694400  | 0.83797500  | -1.49222300 |
| H | 4.06354900  | 1.68764200  | 0.00170200  |

|   |             |             |             |
|---|-------------|-------------|-------------|
| H | 1.24853100  | 0.35396800  | 1.22679200  |
| H | 3.00008700  | -1.12502500 | 1.72286000  |
| C | -1.26983700 | -0.67169800 | 0.16794300  |
| C | -2.70251200 | -0.35252400 | -0.27432200 |
| C | -0.88870500 | -2.10008500 | -0.23656200 |
| H | -1.22899100 | -0.60172700 | 1.26734600  |
| C | -3.69861300 | -1.38058200 | 0.26591600  |
| H | -2.73778900 | -0.35498600 | -1.37482000 |
| H | -2.97955800 | 0.65585300  | 0.05002600  |
| C | -1.88761000 | -3.12681300 | 0.30258700  |
| H | -0.86978900 | -2.15690400 | -1.33589900 |
| H | 0.12503700  | -2.33344900 | 0.10580200  |
| C | -3.31344200 | -2.80174400 | -0.14558700 |
| H | -4.70868900 | -1.14046500 | -0.08124800 |
| H | -3.71817800 | -1.31666100 | 1.36255100  |
| H | -1.60189500 | -4.13317700 | -0.02075300 |
| H | -1.84674300 | -3.12293900 | 1.40048400  |
| H | -4.01939000 | -3.52721100 | 0.27165800  |
| H | -3.37568800 | -2.88987100 | -1.23900700 |

**Int13**

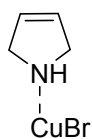

|    |             |             |             |
|----|-------------|-------------|-------------|
| N  | -1.63223800 | -0.00043200 | 0.52308300  |
| C  | -2.34762900 | -1.19187700 | -0.02506500 |
| H  | -1.83867700 | -1.54279500 | -0.93057500 |
| H  | -2.32529600 | -2.00552300 | 0.70400600  |
| C  | -2.34673500 | 1.19187400  | -0.02439600 |
| H  | -1.83753400 | 1.54290700  | -0.92972300 |
| H  | -2.32375100 | 2.00509600  | 0.70512800  |
| C  | -3.72428400 | 0.66516100  | -0.34624200 |
| C  | -3.72477700 | -0.66393900 | -0.34663400 |
| H  | -4.56106300 | -1.30613800 | -0.59347100 |
| H  | -4.56008800 | 1.30813600  | -0.59269500 |
| Cu | 0.37166800  | -0.00044100 | 0.23288000  |
| Br | 2.65042300  | 0.00021300  | -0.16713700 |
| H  | -1.81052500 | -0.00064700 | 1.52603800  |

Int14

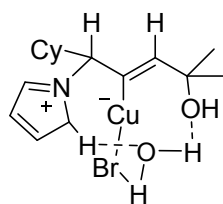

|    |             |             |             |
|----|-------------|-------------|-------------|
| C  | -1.29946500 | 0.28874000  | 0.93393400  |
| H  | -1.72019000 | 0.81241700  | 1.80972600  |
| C  | -0.17645100 | 1.05796500  | 0.26176800  |
| C  | 0.14073700  | 2.25126500  | 0.77079400  |
| N  | -0.66507100 | -0.93360600 | 1.49816500  |
| C  | 0.01913200  | -0.91456800 | 2.78452200  |
| H  | 0.76609600  | -0.10726700 | 2.73806200  |
| H  | -0.68980900 | -0.74853200 | 3.60119900  |
| C  | -0.31271500 | -1.99328900 | 0.83229400  |
| H  | -0.41377900 | 2.72091800  | 1.59464400  |
| H  | -0.63256100 | -2.16103800 | -0.18998100 |
| C  | 0.53966000  | -2.84826000 | 1.63000000  |
| C  | 0.72670400  | -2.22202600 | 2.80654600  |
| C  | 1.30088700  | 3.07601700  | 0.24079200  |
| H  | 0.95661500  | -3.78071800 | 1.27930000  |
| H  | 1.33093900  | -2.55372200 | 3.64008400  |
| O  | 2.33692500  | 2.14791100  | -0.13675100 |
| H  | 3.02817100  | 2.63122300  | -0.60599100 |
| C  | 0.87438000  | 3.86528800  | -0.99708500 |
| H  | 0.05058300  | 4.54243200  | -0.75476400 |
| H  | 1.70374900  | 4.46662900  | -1.39042700 |
| H  | 0.53571900  | 3.16638600  | -1.76658600 |
| C  | 1.84468900  | 3.99617800  | 1.33134700  |
| H  | 2.69814900  | 4.57573400  | 0.96343100  |
| H  | 1.07473600  | 4.69880900  | 1.66339400  |
| H  | 2.17078800  | 3.40334700  | 2.19048700  |
| Cu | 1.07255000  | 0.01455700  | -0.92782600 |
| Br | 2.27340500  | -1.98565100 | -1.53906800 |
| O  | 2.65561900  | -0.21213100 | 1.55526100  |
| H  | 2.65366800  | 0.63371400  | 1.07811100  |
| H  | 2.88410400  | -0.86173300 | 0.87328400  |
| C  | -2.44910900 | -0.07363500 | -0.01273400 |
| C  | -3.52533200 | -0.93522000 | 0.65923300  |
| C  | -3.06672500 | 1.21556200  | -0.56788700 |
| H  | -2.02256300 | -0.62051900 | -0.86873600 |
| C  | -4.68104500 | -1.23829600 | -0.29723900 |
| H  | -3.91221100 | -0.38985700 | 1.53284600  |
| H  | -3.09907000 | -1.87125200 | 1.03849100  |



|   |             |             |             |
|---|-------------|-------------|-------------|
| C | -4.22657000 | 0.91544900  | -1.51895900 |
| H | -3.43059400 | 1.82094000  | 0.27653300  |
| H | -2.29077300 | 1.80221700  | -1.06828200 |
| C | -5.29344700 | 0.05107600  | -0.84519100 |
| H | -5.44105600 | -1.84020900 | 0.21131000  |
| H | -4.30456700 | -1.84240800 | -1.13386800 |
| H | -4.66348400 | 1.85158700  | -1.88085400 |
| H | -3.83758900 | 0.38697800  | -2.39974300 |
| H | -6.10000700 | -0.17897800 | -1.54871500 |
| H | -5.74500500 | 0.61406700  | -0.01668700 |

**TS7**

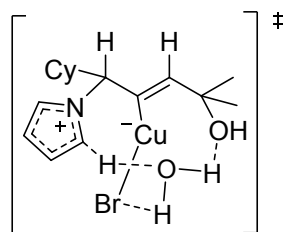

|   |             |             |             |
|---|-------------|-------------|-------------|
| C | -1.39625600 | 0.11921700  | 0.90443700  |
| H | -1.81647500 | 0.58956700  | 1.80980400  |
| C | -0.22897000 | 0.90468300  | 0.34336700  |
| C | 0.07698900  | 2.05480900  | 0.95244600  |
| N | -0.83562300 | -1.17802300 | 1.37549200  |
| C | 0.05747700  | -1.25342900 | 2.47543300  |
| H | 1.20008800  | -0.77244100 | 2.05217900  |
| H | -0.18543500 | -0.64198500 | 3.34126800  |
| C | -0.81713800 | -2.33128100 | 0.72892700  |
| H | -0.53138400 | 2.45467600  | 1.77479500  |
| H | -1.32902300 | -2.45576600 | -0.21584900 |
| C | -0.02906900 | -3.27596500 | 1.42842200  |
| C | 0.45436600  | -2.63362200 | 2.54144600  |
| C | 1.28634200  | 2.90652100  | 0.58499600  |
| H | 0.16136100  | -4.28858900 | 1.10723300  |
| H | 1.11158500  | -3.04081600 | 3.29807900  |
| O | 2.46817900  | 2.07799700  | 0.46145800  |
| H | 2.57619400  | 1.80793000  | -0.46170700 |
| C | 1.06170600  | 3.63392100  | -0.73816200 |
| H | 0.19012900  | 4.29003300  | -0.66775900 |
| H | 1.93685900  | 4.23520000  | -1.00441500 |
| H | 0.86323100  | 2.90361000  | -1.53124900 |
| C | 1.60687300  | 3.88634200  | 1.70695600  |
| H | 2.48392700  | 4.48402700  | 1.44882700  |
| H | 0.75834800  | 4.55341400  | 1.88258800  |
| H | 1.81616600  | 3.34223900  | 2.63263100  |

|    |             |             |             |
|----|-------------|-------------|-------------|
| Cu | 0.96445800  | -0.09971800 | -0.91637500 |
| Br | 2.82454300  | -1.42999000 | -1.58864800 |
| O  | 2.44114900  | -0.35055600 | 1.69344300  |
| H  | 2.41514100  | 0.57961400  | 1.34282100  |
| H  | 2.75827000  | -0.88724500 | 0.93871700  |
| C  | -2.53847300 | -0.08615800 | -0.09677600 |
| C  | -3.72259200 | -0.86776200 | 0.48959400  |
| C  | -3.01873700 | 1.28043400  | -0.60567900 |
| H  | -2.13695400 | -0.62573100 | -0.96978800 |
| C  | -4.84959800 | -1.02594000 | -0.53392000 |
| H  | -4.10124600 | -0.31554800 | 1.36201900  |
| H  | -3.40994000 | -1.85055100 | 0.85875800  |
| C  | -4.15080600 | 1.13270100  | -1.62310300 |
| H  | -3.36925600 | 1.87122800  | 0.25433700  |
| H  | -2.17644800 | 1.82569100  | -1.04101400 |
| C  | -5.32152200 | 0.33448800  | -1.04928700 |
| H  | -5.68330300 | -1.57956400 | -0.09007700 |
| H  | -4.48522500 | -1.62555400 | -1.37959200 |
| H  | -4.48625900 | 2.12101700  | -1.95304300 |
| H  | -3.76407300 | 0.61759300  | -2.51306300 |
| H  | -6.10462900 | 0.20586400  | -1.80329600 |
| H  | -5.76874300 | 0.89644200  | -0.21788400 |

**Int15**

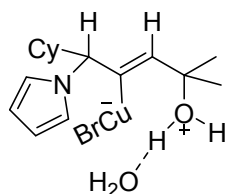

|   |             |             |             |
|---|-------------|-------------|-------------|
| C | 1.54283800  | 0.05673900  | 0.92715800  |
| H | 1.95551000  | -0.26080800 | 1.89952600  |
| C | 0.24375800  | -0.65457100 | 0.60475300  |
| C | -0.30651700 | -1.40013700 | 1.57189600  |
| N | 1.19797900  | 1.48123700  | 1.09449600  |
| C | 0.73430100  | 2.00456000  | 2.26922000  |
| H | -1.45871800 | 1.73478900  | 1.59201500  |
| H | 0.86111500  | 1.46312900  | 3.19583800  |
| C | 0.89643600  | 2.34695500  | 0.07516900  |
| H | 0.19147900  | -1.57395800 | 2.53395300  |
| H | 1.16408700  | 2.12094000  | -0.94676900 |
| C | 0.26228900  | 3.44922700  | 0.60620000  |
| C | 0.15687400  | 3.23282600  | 2.00908700  |
| C | -1.67016900 | -2.05398000 | 1.45835400  |
| H | -0.06027500 | 4.32007800  | 0.05492600  |

|    |             |             |             |
|----|-------------|-------------|-------------|
| H  | -0.25138900 | 3.91094400  | 2.74439400  |
| O  | -2.69803200 | -1.01800800 | 1.08248400  |
| H  | -2.91461800 | -1.03409400 | 0.12318800  |
| C  | -1.74122400 | -3.11096900 | 0.36653500  |
| H  | -1.05410400 | -3.92229700 | 0.61670400  |
| H  | -2.75218900 | -3.52110100 | 0.27616100  |
| H  | -1.42278400 | -2.69104600 | -0.59295200 |
| C  | -2.15093600 | -2.58511400 | 2.79824900  |
| H  | -3.15288400 | -3.01043000 | 2.71139000  |
| H  | -1.46331400 | -3.36124000 | 3.14381300  |
| H  | -2.16662700 | -1.78532200 | 3.54379000  |
| Cu | -0.79851700 | -0.06398300 | -1.00810500 |
| Br | -2.95829100 | 0.48205000  | -1.93706900 |
| O  | -2.32278500 | 1.36473700  | 1.31625200  |
| H  | -2.43258000 | 0.04915400  | 1.28222600  |
| H  | -2.49209100 | 1.67633500  | 0.40716900  |
| C  | 2.62631700  | -0.14725800 | -0.13380700 |
| C  | 3.90353100  | 0.64104900  | 0.17299300  |
| C  | 2.93702000  | -1.64155600 | -0.27776100 |
| H  | 2.22311300  | 0.19394000  | -1.10108200 |
| C  | 4.98101400  | 0.39277500  | -0.88495200 |
| H  | 4.28122700  | 0.32379800  | 1.15637200  |
| H  | 3.68031200  | 1.71036800  | 0.25008700  |
| C  | 4.01422100  | -1.88920700 | -1.33536100 |
| H  | 3.28348200  | -2.02346900 | 0.69466900  |
| H  | 2.01958700  | -2.18722600 | -0.52341100 |
| C  | 5.28705500  | -1.09962900 | -1.02547800 |
| H  | 5.88968100  | 0.94909400  | -0.63331700 |
| H  | 4.63065800  | 0.78062300  | -1.85130700 |
| H  | 4.23372300  | -2.95952100 | -1.40557200 |
| H  | 3.62851700  | -1.57967900 | -2.31638600 |
| H  | 6.03921800  | -1.26389700 | -1.80392700 |
| H  | 5.71688000  | -1.46811900 | -0.08393300 |

**Int16**

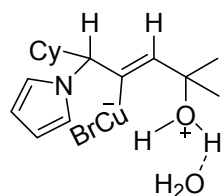

|   |             |            |            |
|---|-------------|------------|------------|
| C | 1.57894100  | 1.03082900 | 0.06813700 |
| H | 2.07135800  | 1.88449200 | 0.56112200 |
| C | 0.10386100  | 0.97721300 | 0.41725900 |
| C | -0.37147800 | 1.89193700 | 1.27157300 |

|    |              |              |              |
|----|--------------|--------------|--------------|
| N  | 1. 71703000  | 1. 27686500  | -1. 36899300 |
| C  | 1. 96859400  | 2. 49955800  | -1. 92780200 |
| H  | 2. 19107900  | 3. 34911400  | -1. 29851600 |
| C  | 1. 45149200  | 0. 37708900  | -2. 37003700 |
| H  | 0. 25451800  | 2. 64996800  | 1. 75340600  |
| H  | 1. 23208100  | -0. 65876100 | -2. 15103300 |
| C  | 1. 55360800  | 1. 03118900  | -3. 57756400 |
| C  | 1. 88285600  | 2. 38331900  | -3. 29637600 |
| C  | -1. 84832100 | 1. 98814400  | 1. 60430700  |
| H  | 1. 42103500  | 0. 58069200  | -4. 55016300 |
| H  | 2. 05125800  | 3. 17529400  | -4. 01095600 |
| O  | -2. 55871200 | 1. 81473600  | 0. 28453100  |
| C  | -2. 33287300 | 0. 87432400  | 2. 52270300  |
| H  | -1. 82449200 | 0. 97274100  | 3. 48481100  |
| H  | -3. 41306400 | 0. 92770300  | 2. 68957600  |
| H  | -2. 07493000 | -0. 10433400 | 2. 10594400  |
| C  | -2. 24300400 | 3. 36673300  | 2. 09971400  |
| H  | -3. 32309500 | 3. 43519500  | 2. 25100500  |
| H  | -1. 74524300 | 3. 55879100  | 3. 05380200  |
| H  | -1. 93151300 | 4. 13129300  | 1. 38464000  |
| Cu | -0. 86854000 | -0. 63263000 | -0. 33140300 |
| Br | -2. 40658500 | -2. 38089700 | -0. 87759200 |
| H  | -1. 82973300 | 1. 58789300  | -0. 34369200 |
| H  | -3. 31983800 | 1. 03531200  | 0. 25248400  |
| O  | -4. 24173700 | 0. 04872800  | 0. 18758700  |
| H  | -3. 80253300 | -0. 81375700 | -0. 02834700 |
| H  | -4. 92554900 | 0. 17462100  | -0. 48261500 |
| C  | 2. 33087500  | -0. 24157000 | 0. 49140900  |
| C  | 3. 80717800  | -0. 19032400 | 0. 08291700  |
| C  | 2. 19495300  | -0. 47210200 | 2. 00090500  |
| H  | 1. 86036500  | -1. 10063600 | -0. 01674600 |
| C  | 4. 55759000  | -1. 44603600 | 0. 53096400  |
| H  | 4. 26728900  | 0. 69333700  | 0. 55009800  |
| H  | 3. 89164300  | -0. 05684200 | -1. 00010000 |
| C  | 2. 95199900  | -1. 72353500 | 2. 45023600  |
| H  | 2. 59572400  | 0. 40828900  | 2. 52681000  |
| H  | 1. 13673900  | -0. 54689900 | 2. 27381500  |
| C  | 4. 42409600  | -1. 66297900 | 2. 03913000  |
| H  | 5. 61195200  | -1. 37499000 | 0. 24503400  |
| H  | 4. 14502300  | -2. 31713400 | 0. 00401400  |
| H  | 2. 86041000  | -1. 84787800 | 3. 53419100  |
| H  | 2. 48595100  | -2. 60548300 | 1. 99023100  |
| H  | 4. 94300300  | -2. 57806500 | 2. 34258700  |
| H  | 4. 91086300  | -0. 83079900 | 2. 56614600  |

TS8

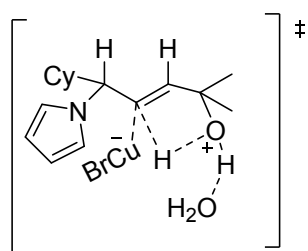

|    |             |             |             |
|----|-------------|-------------|-------------|
| C  | 1.51486700  | 0.95838600  | 0.54841300  |
| H  | 1.94913700  | 1.41931700  | 1.44842700  |
| C  | 0.00932900  | 1.13713700  | 0.54760200  |
| C  | -0.60447800 | 1.78228700  | 1.54256300  |
| N  | 2.08995800  | 1.68340500  | -0.58258500 |
| C  | 3.07235100  | 2.63252500  | -0.49461100 |
| H  | 3.42605300  | 2.96358800  | 0.47093200  |
| C  | 1.83263300  | 1.42772000  | -1.90458800 |
| H  | -0.11836400 | 2.18400400  | 2.43467600  |
| H  | 1.08752500  | 0.70068400  | -2.19587600 |
| C  | 2.65337100  | 2.22782000  | -2.66602100 |
| C  | 3.44220800  | 2.99575400  | -1.76903000 |
| C  | -2.08472100 | 2.10422000  | 1.36719300  |
| H  | 2.67652400  | 2.26086100  | -3.74524400 |
| H  | 4.18989200  | 3.73174700  | -2.02488800 |
| O  | -2.26357600 | 1.98030500  | -0.08336700 |
| C  | -2.99232600 | 1.10425800  | 2.07460900  |
| H  | -2.82009200 | 1.16078600  | 3.15247900  |
| H  | -4.04706700 | 1.31723500  | 1.87744600  |
| H  | -2.76617300 | 0.08289700  | 1.74920300  |
| C  | -2.39328800 | 3.54347500  | 1.74324900  |
| H  | -3.44241800 | 3.77687100  | 1.54391500  |
| H  | -2.19761900 | 3.69540700  | 2.80845100  |
| H  | -1.76156100 | 4.22473000  | 1.16917400  |
| Cu | -0.85748800 | -0.51692200 | -0.39389800 |
| Br | -2.16547500 | -2.36118900 | -1.09803100 |
| H  | -1.23762400 | 1.53566600  | -0.31294200 |
| H  | -3.01867400 | 1.33631000  | -0.36537200 |
| O  | -4.05001300 | 0.35629600  | -0.81874000 |
| H  | -3.70225900 | -0.56085900 | -0.81721000 |
| H  | -4.36586500 | 0.50695900  | -1.71792400 |
| C  | 1.95500500  | -0.51882500 | 0.51894400  |
| C  | 3.47725600  | -0.65716000 | 0.41821000  |
| C  | 1.42531500  | -1.29128400 | 1.73228100  |
| H  | 1.52858900  | -0.97692200 | -0.39371700 |
| C  | 3.89733500  | -2.12776100 | 0.36788300  |

|   |            |             |             |
|---|------------|-------------|-------------|
| H | 3.93214200 | -0.17496000 | 1.29704400  |
| H | 3.84151100 | -0.12222700 | -0.46504400 |
| C | 1.84111700 | -2.76261700 | 1.68017800  |
| H | 1.82595100 | -0.82350900 | 2.64471900  |
| H | 0.33226500 | -1.21377000 | 1.80021200  |
| C | 3.36011400 | -2.90467500 | 1.57092900  |
| H | 4.98823100 | -2.20373100 | 0.31735500  |
| H | 3.50619300 | -2.57671600 | -0.55514100 |
| H | 1.46833800 | -3.28793300 | 2.56521900  |
| H | 1.36382300 | -3.23273900 | 0.80939800  |
| H | 3.63885700 | -3.96094000 | 1.49927200  |
| H | 3.82391100 | -2.51464900 | 2.48769300  |

**Int17**

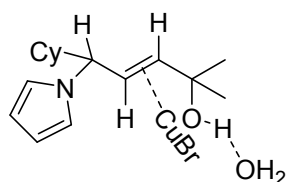

|    |             |             |             |
|----|-------------|-------------|-------------|
| C  | -1.51510600 | 0.18141500  | -0.28100300 |
| H  | -1.17310700 | -0.09643400 | -1.28747200 |
| C  | -0.41427100 | 0.96438000  | 0.41312600  |
| C  | 0.41096100  | 1.81534000  | -0.23604000 |
| N  | -2.66829500 | 1.05082800  | -0.48008300 |
| C  | -3.25147500 | 1.33137100  | -1.68787400 |
| H  | -2.84295800 | 0.92187100  | -2.60048400 |
| C  | -3.37645500 | 1.67195300  | 0.51728400  |
| H  | 0.32842700  | 1.91984400  | -1.32094000 |
| H  | -3.07485000 | 1.58286100  | 1.55091600  |
| C  | -4.41882900 | 2.35719300  | -0.06152200 |
| C  | -4.34062200 | 2.13992100  | -1.46288400 |
| C  | 1.33188600  | 2.79543000  | 0.47795500  |
| H  | -5.15212700 | 2.95043400  | 0.46423000  |
| H  | -5.00514100 | 2.52993600  | -2.21922600 |
| O  | 1.47267900  | 2.44694900  | 1.83900400  |
| C  | 2.69478100  | 2.85634100  | -0.21537800 |
| H  | 2.59045100  | 3.13741200  | -1.26717500 |
| H  | 3.32306900  | 3.59626200  | 0.28684100  |
| H  | 3.20336500  | 1.88510600  | -0.17936600 |
| C  | 0.64623600  | 4.16335500  | 0.45360800  |
| H  | 1.29084300  | 4.89469500  | 0.94716300  |
| H  | 0.45365400  | 4.49066100  | -0.57144800 |
| H  | -0.30399100 | 4.10753100  | 0.99027900  |
| Cu | 1.46356100  | -0.18237500 | -0.05872000 |

|    |             |             |             |
|----|-------------|-------------|-------------|
| Br | 3.17133400  | -1.48839800 | -1.12284000 |
| H  | -0.39254900 | 0.97001800  | 1.50436900  |
| H  | 2.11639800  | 1.72421300  | 1.91144500  |
| O  | 2.86889400  | -0.08359800 | 1.84498500  |
| H  | 3.50830700  | -0.52264800 | 1.25507700  |
| H  | 2.70194900  | -0.70434500 | 2.56372700  |
| C  | -1.91458500 | -1.10392300 | 0.46389400  |
| C  | -3.03543200 | -1.83070900 | -0.28825700 |
| C  | -0.71134000 | -2.03163500 | 0.67586000  |
| H  | -2.29882600 | -0.80884600 | 1.45368200  |
| C  | -3.42728800 | -3.14053300 | 0.39589100  |
| H  | -2.68595700 | -2.04714500 | -1.30938600 |
| H  | -3.90315900 | -1.16986200 | -0.38175200 |
| C  | -1.10963000 | -3.35069000 | 1.34477200  |
| H  | -0.23940500 | -2.24704200 | -0.29634000 |
| H  | 0.04718100  | -1.53799300 | 1.30378200  |
| C  | -2.21675900 | -4.05856600 | 0.56400900  |
| H  | -4.21300600 | -3.63993100 | -0.17923300 |
| H  | -3.85221700 | -2.91793100 | 1.38421800  |
| H  | -0.22958500 | -3.99438300 | 1.43809900  |
| H  | -1.46535200 | -3.14082700 | 2.36262700  |
| H  | -2.50317800 | -4.98452400 | 1.07246800  |
| H  | -1.83513100 | -4.34258900 | -0.42578500 |

**water cluster**

|   |             |             |             |
|---|-------------|-------------|-------------|
| O | 0.10716500  | 1.57578400  | 0.11811500  |
| H | 0.03511000  | 2.09531900  | -0.68849300 |
| H | -0.66199000 | 0.97161500  | 0.10127200  |
| O | 1.32035700  | -0.87778500 | -0.10178800 |
| O | -1.42526500 | -0.68767000 | -0.09332500 |
| H | -0.52785900 | -1.07277300 | -0.13766300 |
| H | -1.83286800 | -1.06421700 | 0.69212700  |
| H | 1.17936300  | 0.08913000  | -0.05824200 |
| H | 1.79018400  | -1.10170700 | 0.70698200  |

**Int18**

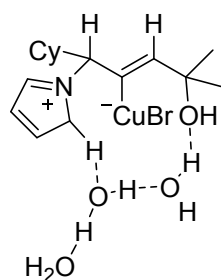

|   |            |            |             |
|---|------------|------------|-------------|
| C | 1.48333600 | 0.04202500 | -0.90656800 |
|---|------------|------------|-------------|

|    |             |             |             |
|----|-------------|-------------|-------------|
| H  | 1.97361600  | 0.38501900  | -1.83356000 |
| C  | 0.25947900  | 0.85796300  | -0.56108100 |
| C  | 0.08357400  | 1.97616800  | -1.27073700 |
| N  | 1.08821400  | -1.36029400 | -1.20423600 |
| C  | 1.31283000  | -1.98061800 | -2.49908900 |
| H  | 0.68883300  | -1.43182100 | -3.22003900 |
| H  | 2.37315300  | -1.93486700 | -2.76832600 |
| C  | 0.44553700  | -2.17182500 | -0.42566600 |
| H  | 0.75930300  | 2.27114500  | -2.08658500 |
| H  | 0.13549200  | -1.87879500 | 0.57413300  |
| C  | 0.22640200  | -3.44455500 | -1.08352600 |
| C  | 0.76175700  | -3.34881100 | -2.31436300 |
| C  | -1.01323700 | 2.99406000  | -1.03918700 |
| H  | -0.30587700 | -4.27043300 | -0.63636800 |
| H  | 0.76318900  | -4.10080900 | -3.09213000 |
| O  | -1.91653300 | 2.46394200  | -0.05378300 |
| H  | -2.50941000 | 3.16863800  | 0.23448800  |
| C  | -0.40297000 | 4.28734000  | -0.49580800 |
| H  | 0.33830600  | 4.68523400  | -1.19430200 |
| H  | -1.17313000 | 5.05487500  | -0.35095100 |
| H  | 0.08831900  | 4.08796200  | 0.46008900  |
| C  | -1.78769400 | 3.24847000  | -2.33392300 |
| H  | -2.56588000 | 4.00401500  | -2.17754200 |
| H  | -1.11639000 | 3.61166600  | -3.11755500 |
| H  | -2.25872500 | 2.32248300  | -2.67381500 |
| Cu | -1.02534300 | 0.36159000  | 0.89485000  |
| Br | -2.26532200 | -0.90487100 | 2.52791000  |
| O  | -1.44136600 | -1.28756500 | -2.77637500 |
| H  | -1.89283000 | -0.46079700 | -2.53414000 |
| H  | -1.81424000 | -1.89746200 | -2.12430800 |
| O  | -3.23340700 | 0.31678100  | -1.37719800 |
| O  | -2.62767500 | -2.45682700 | -0.36679100 |
| H  | -3.47346300 | -2.91766800 | -0.39598700 |
| H  | -2.54080400 | -2.14369500 | 0.55611200  |
| H  | -2.87107000 | 1.02764000  | -0.82407800 |
| H  | -3.18960000 | -0.48738100 | -0.83902500 |
| C  | 2.53869000  | 0.02534900  | 0.21765600  |
| C  | 3.73734100  | -0.86623800 | -0.13169700 |
| C  | 3.00244500  | 1.45186500  | 0.52756600  |
| H  | 2.04503800  | -0.37304200 | 1.11932600  |
| C  | 4.80334500  | -0.84397000 | 0.96602100  |
| H  | 4.18129300  | -0.50276400 | -1.07151700 |
| H  | 3.41161600  | -1.89906300 | -0.31008500 |
| C  | 4.07318200  | 1.47129000  | 1.62018100  |



|   |            |             |             |
|---|------------|-------------|-------------|
| H | 3.40850900 | 1.89577600  | -0.39466400 |
| H | 2.14024000 | 2.05839400  | 0.81616800  |
| C | 5.26418000 | 0.58471500  | 1.25403300  |
| H | 5.65159300 | -1.47327700 | 0.67793400  |
| H | 4.38164000 | -1.27813100 | 1.88235300  |
| H | 4.40153000 | 2.49992200  | 1.80036900  |
| H | 3.63178500 | 1.11139800  | 2.55922900  |
| H | 6.00801500 | 0.59047700  | 2.05721600  |
| H | 5.75633400 | 0.99176600  | 0.36001800  |

**TS9**

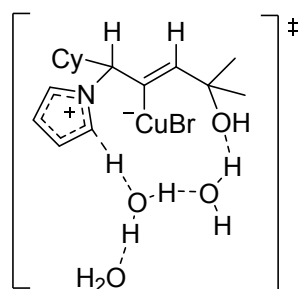

|   |             |             |             |
|---|-------------|-------------|-------------|
| C | -1.58521000 | 0.17634500  | 0.97185500  |
| H | -2.11647100 | 0.67324400  | 1.80364800  |
| C | -0.24762400 | 0.82679100  | 0.70158100  |
| C | 0.00411600  | 1.92568400  | 1.42109900  |
| N | -1.36193500 | -1.20883900 | 1.46728100  |
| C | -0.66856900 | -1.45499800 | 2.68928500  |
| H | 0.52317300  | -1.46911400 | 2.31011500  |
| H | -0.80376800 | -0.71507500 | 3.47309000  |
| C | -1.62852900 | -2.35706200 | 0.88708200  |
| H | -0.70294200 | 2.29784000  | 2.17782300  |
| H | -2.02655600 | -2.40853500 | -0.11650100 |
| C | -1.28857000 | -3.43747300 | 1.74849400  |
| C | -0.77668000 | -2.88502500 | 2.88793700  |
| C | 1.20121300  | 2.84098600  | 1.28226500  |
| H | -1.39507600 | -4.48254200 | 1.50042200  |
| H | -0.36934400 | -3.40730700 | 3.74312100  |
| O | 2.11507700  | 2.26998600  | 0.33270600  |
| H | 2.67867200  | 2.97124300  | -0.01551500 |
| C | 0.73346900  | 4.19842100  | 0.75422400  |
| H | -0.00425500 | 4.63918000  | 1.42985400  |
| H | 1.57366800  | 4.89933600  | 0.67294700  |
| H | 0.27257600  | 4.07007700  | -0.22873100 |
| C | 1.92060300  | 2.98847900  | 2.62461300  |
| H | 2.77431900  | 3.66880700  | 2.53547500  |
| H | 1.24292500  | 3.38802600  | 3.38466200  |
| H | 2.28246400  | 2.01264300  | 2.96016200  |

|    |             |             |             |
|----|-------------|-------------|-------------|
| Cu | 1.01124800  | 0.14072100  | -0.69607700 |
| Br | 2.50941000  | -0.79460200 | -2.35650400 |
| O  | 1.76404700  | -1.87602300 | 1.70067400  |
| H  | 2.42006800  | -1.17157800 | 1.44891900  |
| H  | 1.49908700  | -2.32787800 | 0.86981800  |
| O  | 3.53305000  | -0.07562600 | 0.86426000  |
| O  | 0.86750700  | -3.13307100 | -0.61975800 |
| H  | 1.33703700  | -3.96817300 | -0.72602300 |
| H  | 1.22908900  | -2.55751800 | -1.32034700 |
| H  | 3.09907600  | 0.79420800  | 0.77841600  |
| H  | 3.69904100  | -0.34459400 | -0.05373000 |
| C  | -2.52403300 | 0.18184800  | -0.24502600 |
| C  | -3.94506400 | -0.28945300 | 0.10594300  |
| C  | -2.59430500 | 1.58543800  | -0.86386200 |
| H  | -2.09023700 | -0.47801500 | -1.01355600 |
| C  | -4.86156000 | -0.28313400 | -1.11901300 |
| H  | -4.35289500 | 0.39789700  | 0.86108000  |
| H  | -3.94344800 | -1.28300700 | 0.56702100  |
| C  | -3.51782600 | 1.61140300  | -2.08321500 |
| H  | -2.95872100 | 2.29094400  | -0.10150700 |
| H  | -1.58904800 | 1.91263500  | -1.14092500 |
| C  | -4.92226300 | 1.10966200  | -1.74605100 |
| H  | -5.86372600 | -0.62403000 | -0.83926200 |
| H  | -4.47819500 | -0.99801000 | -1.86018200 |
| H  | -3.56235300 | 2.62556500  | -2.49302200 |
| H  | -3.08569400 | 0.97418400  | -2.86681600 |
| H  | -5.55229500 | 1.10052100  | -2.64128200 |
| H  | -5.39067200 | 1.80147500  | -1.03258100 |

**Int19**

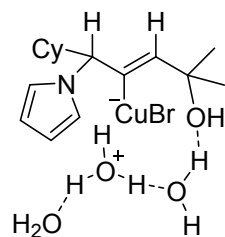

|   |             |             |            |
|---|-------------|-------------|------------|
| C | -1.55510900 | -0.09644400 | 0.78799400 |
| H | -1.99876900 | 0.24502300  | 1.73707000 |
| C | -0.39793100 | 0.80023400  | 0.37449200 |
| C | -0.37989400 | 2.01814200  | 0.94489200 |
| N | -1.09065800 | -1.46888200 | 1.06074400 |
| C | -0.95618200 | -2.01724000 | 2.30440800 |
| H | 1.22140400  | 0.46649900  | 1.81632100 |
| H | -1.18903400 | -1.43765500 | 3.18606900 |

|    |             |             |             |
|----|-------------|-------------|-------------|
| C  | -0.75285800 | -2.40429000 | 0.12062800  |
| H  | -1.14644900 | 2.30889400  | 1.67757900  |
| H  | -0.80481300 | -2.18319600 | -0.93597800 |
| C  | -0.40996700 | -3.57360600 | 0.77237000  |
| C  | -0.53613100 | -3.32553500 | 2.16778200  |
| C  | 0.55022600  | 3.17247000  | 0.61562200  |
| H  | -0.11985300 | -4.49874500 | 0.29562900  |
| H  | -0.35905700 | -4.02271300 | 2.97329700  |
| O  | 1.49563300  | 2.82344200  | -0.40439400 |
| H  | 1.00368500  | 2.36036300  | -1.10053100 |
| C  | -0.28381100 | 4.35124700  | 0.10500200  |
| H  | -1.01706900 | 4.66373700  | 0.85378400  |
| H  | 0.36877100  | 5.19674800  | -0.12774100 |
| H  | -0.82550400 | 4.06403300  | -0.80163200 |
| C  | 1.37269700  | 3.59417900  | 1.83125300  |
| H  | 2.03563200  | 4.42241500  | 1.56652500  |
| H  | 0.70905900  | 3.92103900  | 2.63570800  |
| H  | 1.98027000  | 2.76724500  | 2.20964200  |
| Cu | 1.00473100  | -0.08361500 | -0.77979000 |
| Br | 2.93025600  | -1.12947400 | -1.77058300 |
| O  | 2.11867000  | 0.15518600  | 2.07397900  |
| H  | 2.80194600  | 0.67595400  | 1.41599600  |
| H  | 2.18143900  | -0.88621600 | 1.83208800  |
| O  | 3.55618500  | 1.34640100  | 0.47805100  |
| O  | 2.32376400  | -2.19407300 | 1.38325600  |
| H  | 1.48827100  | -2.69756200 | 1.41842500  |
| H  | 2.61133500  | -2.20008700 | 0.45030100  |
| H  | 2.92197600  | 1.98404300  | 0.06658700  |
| H  | 3.80502600  | 0.72848400  | -0.23338900 |
| C  | -2.69456700 | -0.12725000 | -0.25281200 |
| C  | -3.81468600 | -1.08512300 | 0.17723200  |
| C  | -3.26519200 | 1.27550500  | -0.49276000 |
| H  | -2.27388900 | -0.48116600 | -1.20743600 |
| C  | -4.96436200 | -1.10521600 | -0.83185600 |
| H  | -4.19690700 | -0.75267600 | 1.15421800  |
| H  | -3.41922700 | -2.09598100 | 0.31909400  |
| C  | -4.41843200 | 1.25383000  | -1.49850700 |
| H  | -3.62520600 | 1.67760700  | 0.46713500  |
| H  | -2.47553600 | 1.94834600  | -0.83848200 |
| C  | -5.52713100 | 0.29754300  | -1.06024500 |
| H  | -5.75036400 | -1.78494300 | -0.48736900 |
| H  | -4.59619500 | -1.50531900 | -1.78637200 |
| H  | -4.81372300 | 2.26593900  | -1.63279600 |
| H  | -4.03282300 | 0.93218500  | -2.47556600 |

|   |             |            |             |
|---|-------------|------------|-------------|
| H | -6.32957000 | 0.27327000 | -1.80471400 |
| H | -5.97041300 | 0.66471900 | -0.12444900 |

**TS10**

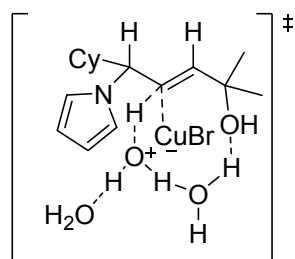

|    |             |             |             |
|----|-------------|-------------|-------------|
| C  | -1.56111900 | 0.04246100  | 1.08431700  |
| H  | -2.10284000 | 0.46535600  | 1.94447000  |
| C  | -0.21615000 | 0.73131300  | 0.92407700  |
| C  | -0.12276400 | 2.03964700  | 1.20944900  |
| N  | -1.35076800 | -1.38041500 | 1.40506900  |
| C  | -0.97357700 | -1.82327100 | 2.64465300  |
| H  | 0.95664500  | 0.02843800  | 1.36176500  |
| H  | -0.85144500 | -1.12179600 | 3.45741700  |
| C  | -1.39284300 | -2.44896400 | 0.54779700  |
| H  | -0.97810700 | 2.59136400  | 1.61851600  |
| H  | -1.68085000 | -2.33694100 | -0.48634500 |
| C  | -1.07523800 | -3.59010300 | 1.25979300  |
| C  | -0.79717400 | -3.18675300 | 2.59427800  |
| C  | 1.12616800  | 2.88960100  | 1.04629100  |
| H  | -1.07396800 | -4.59698600 | 0.86695200  |
| H  | -0.51079500 | -3.81970400 | 3.42055600  |
| O  | 1.98469800  | 2.36177900  | 0.02325800  |
| H  | 1.58364000  | 2.53272300  | -0.84024900 |
| C  | 0.73924000  | 4.31953400  | 0.67104300  |
| H  | 0.13838500  | 4.77853500  | 1.46046300  |
| H  | 1.63944600  | 4.92029400  | 0.51889100  |
| H  | 0.14605900  | 4.33051100  | -0.25073300 |
| C  | 1.95389800  | 2.86781800  | 2.33041300  |
| H  | 2.84822000  | 3.48521800  | 2.20902100  |
| H  | 1.36437400  | 3.25921800  | 3.16327800  |
| H  | 2.25136700  | 1.84559600  | 2.57626400  |
| Cu | 0.91929600  | -0.03779100 | -0.66988400 |
| Br | 2.25217700  | -1.01974500 | -2.37632600 |
| O  | 1.90949700  | -0.53936300 | 1.90512000  |
| H  | 2.73827800  | -0.18794900 | 1.45238100  |
| H  | 1.85730500  | -1.48804000 | 1.56802900  |
| O  | 3.86553600  | 0.36381900  | 0.42314600  |
| O  | 1.84613900  | -2.78391000 | 0.61792800  |

|   |             |             |             |
|---|-------------|-------------|-------------|
| H | 0.94609600  | -3.14961800 | 0.62726500  |
| H | 2.05764800  | -2.59434800 | -0.31094500 |
| H | 3.47822800  | 1.22201000  | 0.17963000  |
| H | 3.84413300  | -0.15329400 | -0.39820500 |
| C | -2.49082000 | 0.18558300  | -0.14335200 |
| C | -3.85766000 | -0.47189900 | 0.11528100  |
| C | -2.71270800 | 1.64588800  | -0.55909000 |
| H | -2.00508200 | -0.31530200 | -0.99725500 |
| C | -4.76622500 | -0.38898100 | -1.11192300 |
| H | -4.33418000 | 0.05818000  | 0.95321000  |
| H | -3.74209300 | -1.51204600 | 0.42996100  |
| C | -3.62724900 | 1.74554900  | -1.78340400 |
| H | -3.16447100 | 2.19303100  | 0.28276400  |
| H | -1.75793200 | 2.13162100  | -0.77722400 |
| C | -4.97294800 | 1.06119400  | -1.54590000 |
| H | -5.72709300 | -0.86747100 | -0.89749800 |
| H | -4.30881800 | -0.95325600 | -1.93648300 |
| H | -3.77260000 | 2.79740700  | -2.05015200 |
| H | -3.12661900 | 1.26903400  | -2.63728500 |
| H | -5.59131700 | 1.11009100  | -2.44780300 |
| H | -5.51595900 | 1.59777600  | -0.75604600 |

**Int20**

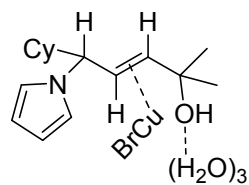

|   |             |             |             |
|---|-------------|-------------|-------------|
| C | 1.45322600  | 0.37126100  | -0.58119300 |
| H | 1.24285000  | 0.68891300  | -1.61234900 |
| C | 0.32633100  | -0.53485100 | -0.12049800 |
| C | -0.51129900 | -1.16230000 | -0.98217500 |
| N | 2.70784700  | -0.37909200 | -0.64906000 |
| C | 3.33926700  | -0.73526800 | -1.81698700 |
| H | 0.31961000  | -0.81024600 | 0.93894500  |
| H | 2.89250500  | -0.50613100 | -2.77378500 |
| C | 3.49133700  | -0.74034200 | 0.41795500  |
| H | -0.38794200 | -1.00698300 | -2.05779200 |
| H | 3.13858600  | -0.62080100 | 1.43242100  |
| C | 4.63334000  | -1.33221100 | -0.07578000 |
| C | 4.53558800  | -1.33196400 | -1.49557000 |
| C | -1.54762300 | -2.20918400 | -0.55624600 |
| H | 5.44491000  | -1.72292900 | 0.52074300  |
| H | 5.26098400  | -1.71151900 | -2.19980200 |

|    |             |             |             |
|----|-------------|-------------|-------------|
| O  | -2.17016000 | -1.80029300 | 0.66808900  |
| H  | -2.96501400 | -1.27208300 | 0.47676700  |
| C  | -2.60322800 | -2.38872300 | -1.64295500 |
| H  | -2.14204700 | -2.73475700 | -2.57219600 |
| H  | -3.33181300 | -3.13646800 | -1.31985700 |
| H  | -3.12805800 | -1.44716200 | -1.83871200 |
| C  | -0.83200500 | -3.52045500 | -0.24294800 |
| H  | -1.56823700 | -4.27762200 | 0.03911100  |
| H  | -0.26436900 | -3.87844900 | -1.10609000 |
| H  | -0.13661200 | -3.37508300 | 0.58632800  |
| O  | 1.44345000  | -2.06124000 | 2.26722800  |
| H  | 0.65855700  | -2.47833600 | 2.66522600  |
| H  | 1.76499300  | -2.69023500 | 1.60041600  |
| O  | -1.09040200 | -3.02253600 | 2.97441200  |
| O  | 2.25806300  | -3.47347200 | -0.14403800 |
| H  | 1.91106400  | -2.76313600 | -0.69962000 |
| H  | 3.20698700  | -3.28538700 | -0.14008200 |
| H  | -1.60334200 | -2.59942700 | 2.26579800  |
| H  | -1.48688600 | -2.73073900 | 3.80044400  |
| C  | 1.64924300  | 1.63816200  | 0.27541000  |
| C  | 2.73211400  | 2.52496300  | -0.35309900 |
| C  | 0.34510900  | 2.42079100  | 0.46483300  |
| H  | 1.98845500  | 1.32013700  | 1.27187200  |
| C  | 2.93494500  | 3.82668200  | 0.42273100  |
| H  | 2.42817400  | 2.76611600  | -1.38326100 |
| H  | 3.67077700  | 1.96537900  | -0.42013200 |
| C  | 0.55401700  | 3.74340500  | 1.21136400  |
| H  | -0.10624300 | 2.63453500  | -0.52057400 |
| H  | -0.36826000 | 1.82592600  | 1.06271300  |
| C  | 1.62372400  | 4.60266500  | 0.54008400  |
| H  | 3.70125700  | 4.43426600  | -0.06809500 |
| H  | 3.31047800  | 3.59382300  | 1.42811200  |
| H  | -0.39797000 | 4.27821900  | 1.27612600  |
| H  | 0.86615800  | 3.51789700  | 2.23939000  |
| H  | 1.77129200  | 5.52797700  | 1.10530600  |
| H  | 1.28159700  | 4.89228000  | -0.46274800 |
| Cu | -1.57753200 | 0.68464700  | -0.24908500 |
| Br | -3.89860200 | 1.14929900  | -0.30522400 |

Int21

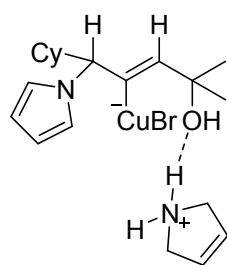

|    |             |             |             |
|----|-------------|-------------|-------------|
| C  | 1.68248600  | -0.84151800 | -0.58499200 |
| H  | 1.97088100  | -1.40338800 | -1.48932500 |
| C  | 0.49560100  | 0.06079500  | -0.84149800 |
| C  | -0.07943400 | 0.00810900  | -2.05192800 |
| N  | 1.26573400  | -1.87673500 | 0.38514200  |
| C  | 0.91804200  | -3.15515800 | 0.05436300  |
| H  | -1.26394500 | -1.94051600 | 0.96735900  |
| H  | 1.07494000  | -3.51935400 | -0.95102400 |
| C  | 0.97281000  | -1.66036000 | 1.70343200  |
| H  | 0.33933300  | -0.60276900 | -2.86500200 |
| H  | 1.16345700  | -0.70386300 | 2.16817800  |
| C  | 0.43068400  | -2.82135900 | 2.22641300  |
| C  | 0.39789300  | -3.77655800 | 1.17281200  |
| H  | 0.13440000  | -2.97133200 | 3.25443600  |
| H  | 0.06940800  | -4.80409200 | 1.23377200  |
| Cu | -0.26972400 | 1.24013000  | 0.59911400  |
| Br | -1.91797600 | 2.37704800  | 1.88786400  |
| C  | -3.23203500 | -1.12335600 | 0.93417700  |
| C  | -4.26445000 | -1.58919700 | -0.05102900 |
| C  | -3.74057000 | -2.36613000 | -0.99149700 |
| C  | -2.26448700 | -2.55932900 | -0.79238000 |
| N  | -1.94703400 | -1.56996100 | 0.29009900  |
| H  | -1.51838400 | -0.74279900 | -0.17104400 |
| H  | -3.33106800 | -1.60604300 | 1.91114100  |
| H  | -5.30530700 | -1.30618000 | 0.03842300  |
| H  | -4.27578900 | -2.83528200 | -1.80709300 |
| H  | -1.64318600 | -2.31168800 | -1.65903300 |
| H  | -3.18778300 | -0.03971300 | 1.08146800  |
| H  | -1.99746000 | -3.56225600 | -0.44748900 |
| C  | 2.91992800  | -0.08825600 | -0.08413700 |
| C  | 4.09081300  | -1.02942000 | 0.21516000  |
| C  | 3.33132300  | 0.97828900  | -1.10469400 |
| H  | 2.64087600  | 0.43576800  | 0.84490000  |
| C  | 5.32929200  | -0.25848500 | 0.67742600  |
| H  | 4.33414800  | -1.58645100 | -0.70223500 |
| H  | 3.79762100  | -1.76994500 | 0.96744000  |

|   |             |             |             |
|---|-------------|-------------|-------------|
| C | 4.57043500  | 1.74684300  | -0.64274200 |
| H | 3.54289200  | 0.48188700  | -2.06445900 |
| H | 2.49538300  | 1.66299600  | -1.28175100 |
| C | 5.73562500  | 0.80132800  | -0.34793700 |
| H | 6.15600000  | -0.95234700 | 0.86195400  |
| H | 5.10906000  | 0.23294800  | 1.63497400  |
| H | 4.85754900  | 2.48553000  | -1.39821000 |
| H | 4.32217500  | 2.30690200  | 0.26910800  |
| H | 6.60513000  | 1.36423600  | 0.00719600  |
| H | 6.03839100  | 0.30219800  | -1.27898800 |
| C | -1.33874300 | 0.79241500  | -2.42352900 |
| C | -2.00605200 | 0.17716200  | -3.64992100 |
| H | -2.90122400 | 0.74413400  | -3.91616900 |
| H | -1.32016300 | 0.17074400  | -4.50170100 |
| H | -2.30621400 | -0.85477000 | -3.43949800 |
| C | -1.00408600 | 2.26249700  | -2.67014900 |
| H | -0.27149000 | 2.35788200  | -3.47603900 |
| H | -1.90383300 | 2.82382200  | -2.94321600 |
| H | -0.56515300 | 2.70098600  | -1.76654200 |
| O | -2.31031000 | 0.69311400  | -1.36191700 |
| H | -2.32839100 | 1.51441300  | -0.84653600 |

**TS11**

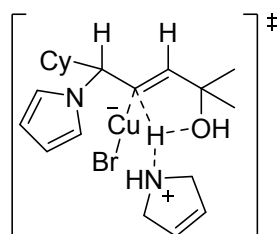

|   |             |            |             |
|---|-------------|------------|-------------|
| C | 1.29911500  | 1.26207100 | 0.76926100  |
| H | 1.59042400  | 1.72203500 | 1.72702500  |
| C | 0.02278800  | 0.45979800 | 0.90505500  |
| C | -0.37950600 | 0.04855900 | 2.11758400  |
| N | 1.02995500  | 2.39051200 | -0.14406500 |
| C | 0.45515800  | 3.56445400 | 0.25716100  |
| H | -1.37724500 | 2.32448100 | -1.12821900 |
| H | 0.34743300  | 3.78528100 | 1.30963900  |
| C | 1.03076000  | 2.33904100 | -1.51189000 |
| H | 0.18989900  | 0.27035500 | 3.02967300  |
| H | 1.42833900  | 1.48469700 | -2.03985900 |
| C | 0.47086300  | 3.50683900 | -1.99198600 |
| C | 0.10106800  | 4.28862300 | -0.86235000 |
| H | 0.37109900  | 3.77644500 | -3.03321300 |
| H | -0.33769600 | 5.27567100 | -0.86792700 |



|    |             |             |             |
|----|-------------|-------------|-------------|
| Cu | -0.32530600 | -1.15613400 | -0.38477000 |
| Br | -0.57431300 | -3.01165500 | -1.81369900 |
| C  | -2.67692500 | 0.75090500  | -1.58125700 |
| C  | -4.08928200 | 0.87090200  | -1.08502400 |
| C  | -4.16929800 | 1.66042100  | -0.02039900 |
| C  | -2.82377000 | 2.20445000  | 0.36439500  |
| N  | -1.90023700 | 1.59942300  | -0.63171400 |
| H  | -1.03626100 | 0.92258100  | -0.02979800 |
| H  | -2.54823700 | 1.11476100  | -2.60549500 |
| H  | -4.91106100 | 0.34829500  | -1.55915800 |
| H  | -5.06976400 | 1.89904000  | 0.53228100  |
| H  | -2.50815400 | 1.88747600  | 1.36580000  |
| H  | -2.30808000 | -0.28361600 | -1.54829400 |
| H  | -2.76452300 | 3.29643200  | 0.31428100  |
| C  | 2.49345000  | 0.42483900  | 0.27688300  |
| C  | 3.74434400  | 1.28745500  | 0.05971400  |
| C  | 2.80804300  | -0.71607900 | 1.25466600  |
| H  | 2.21185900  | -0.04260900 | -0.68190000 |
| C  | 4.92800800  | 0.44958200  | -0.42577200 |
| H  | 4.00464400  | 1.76429800  | 1.01674300  |
| H  | 3.53749400  | 2.09567700  | -0.64789700 |
| C  | 3.99626500  | -1.55265400 | 0.77643400  |
| H  | 3.03351800  | -0.28218800 | 2.24159100  |
| H  | 1.93119000  | -1.35907300 | 1.38360700  |
| C  | 5.23631800  | -0.68858000 | 0.54699700  |
| H  | 5.80657600  | 1.08866200  | -0.56200800 |
| H  | 4.68769400  | 0.02666700  | -1.41078000 |
| H  | 4.20716500  | -2.34405000 | 1.50280400  |
| H  | 3.72056900  | -2.05148300 | -0.16238300 |
| H  | 6.06398000  | -1.29994600 | 0.17309500  |
| H  | 5.56245600  | -0.26254400 | 1.50601700  |
| C  | -1.61553200 | -0.79575100 | 2.35767400  |
| C  | -2.43780400 | -0.22999900 | 3.51769100  |
| H  | -2.74955300 | 0.79570300  | 3.30434800  |
| H  | -3.33403600 | -0.83738000 | 3.67876100  |
| H  | -1.85494100 | -0.22977900 | 4.44328000  |
| C  | -1.20328600 | -2.24220900 | 2.65036900  |
| H  | -0.69458500 | -2.67582300 | 1.78251300  |
| H  | -0.52799600 | -2.28793600 | 3.50949100  |
| H  | -2.08417800 | -2.85272900 | 2.88180500  |
| O  | -2.38790800 | -0.74170300 | 1.15594300  |
| H  | -3.00260200 | -1.48550200 | 1.14364500  |

Int22

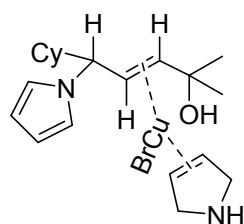

|    |             |             |             |
|----|-------------|-------------|-------------|
| C  | -1.67150400 | 0.58175300  | -1.03224500 |
| H  | -1.67776200 | 0.65270300  | -2.12730200 |
| C  | -0.45730000 | 1.31565300  | -0.49864900 |
| C  | 0.63201300  | 1.61154300  | -1.22650500 |
| N  | -2.86951400 | 1.27087700  | -0.57108400 |
| C  | -3.89476700 | 1.70186400  | -1.37022800 |
| H  | -1.46612900 | 0.27946600  | 3.57082800  |
| H  | -3.80771600 | 1.65329100  | -2.44601100 |
| C  | -3.22692400 | 1.42435500  | 0.74485200  |
| H  | 0.67807900  | 1.27164100  | -2.26260300 |
| H  | -2.55463300 | 1.10230000  | 1.52935800  |
| C  | -4.48735000 | 1.97519700  | 0.78168500  |
| C  | -4.91178600 | 2.15316900  | -0.56244700 |
| H  | -5.04034800 | 2.22797700  | 1.67449400  |
| H  | -5.84884800 | 2.57010200  | -0.90030300 |
| Cu | 1.25635300  | -0.22504300 | 0.32174700  |
| Br | 3.27756900  | -1.13727800 | -0.78319700 |
| C  | -0.43818700 | -1.38061000 | 2.87993400  |
| C  | 1.00051000  | -1.39025500 | 2.42551800  |
| C  | 1.54261000  | -0.17385200 | 2.62375000  |
| C  | 0.50801600  | 0.77422400  | 3.17183000  |
| N  | -0.74637800 | 0.05697200  | 2.89188100  |
| H  | -0.55026400 | 1.67995700  | 0.52728000  |
| H  | -0.49780700 | -1.85265800 | 3.87574600  |
| H  | 1.53917700  | -2.27889900 | 2.11234600  |
| H  | 2.58868500  | 0.08541400  | 2.50059600  |
| H  | 0.53442600  | 1.75309900  | 2.67934100  |
| H  | -1.11652800 | -1.92974500 | 2.21852900  |
| H  | 0.69277800  | 0.93594200  | 4.24720300  |
| C  | -1.68895500 | -0.91368600 | -0.64549100 |
| C  | -3.07685100 | -1.55134400 | -0.77803200 |
| C  | -0.68934600 | -1.71344200 | -1.49163700 |
| H  | -1.39378800 | -0.96559100 | 0.41597000  |
| C  | -3.04200900 | -3.01866900 | -0.33859700 |
| H  | -3.39599200 | -1.48738700 | -1.82905200 |
| H  | -3.81256600 | -0.99634300 | -0.18769700 |
| C  | -0.61651600 | -3.16670800 | -1.02395900 |

|   |             |             |             |
|---|-------------|-------------|-------------|
| H | -1.03194200 | -1.68608000 | -2.53714100 |
| H | 0.31637500  | -1.27502700 | -1.49790100 |
| C | -1.99396100 | -3.82592700 | -1.10793000 |
| H | -4.03336200 | -3.46729800 | -0.45788900 |
| H | -2.80904700 | -3.05969700 | 0.73539000  |
| H | 0.12063900  | -3.71601300 | -1.61673400 |
| H | -0.25696200 | -3.18637600 | 0.01631500  |
| H | -1.95333700 | -4.85340900 | -0.73211900 |
| H | -2.29235900 | -3.88570100 | -2.16343300 |
| C | 1.79242100  | 2.48968600  | -0.74142500 |
| C | 1.26425200  | 3.85115500  | -0.29787700 |
| H | 0.72775100  | 4.34215000  | -1.11345900 |
| H | 0.57872000  | 3.73820700  | 0.54632400  |
| H | 2.10057900  | 4.48116800  | 0.01468300  |
| C | 2.82527300  | 2.63647600  | -1.85427900 |
| H | 3.65985200  | 3.25019800  | -1.50542600 |
| H | 3.20408100  | 1.65254500  | -2.15113600 |
| H | 2.38008900  | 3.11960600  | -2.72876700 |
| O | 2.40653900  | 1.91097700  | 0.42041800  |
| H | 3.11009300  | 1.30918800  | 0.11530800  |

1

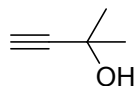

|   |             |             |             |
|---|-------------|-------------|-------------|
| O | 0.74285900  | -0.03773500 | 1.38918000  |
| H | 0.32009500  | -0.79684200 | 1.80857900  |
| C | 0.31606400  | 0.00265500  | 0.03395500  |
| C | 0.83570600  | -1.22475600 | -0.72071200 |
| H | 0.55037100  | -1.18614600 | -1.77482800 |
| H | 1.92530000  | -1.25502400 | -0.64067400 |
| H | 0.42293200  | -2.14135100 | -0.28924000 |
| C | 0.90091800  | 1.29039200  | -0.54052900 |
| H | 0.62131200  | 1.40539200  | -1.58973000 |
| H | 0.53293000  | 2.14734800  | 0.02607400  |
| H | 1.98996400  | 1.25099000  | -0.45680100 |
| C | -1.16363200 | 0.03632600  | -0.03500800 |
| C | -2.36780300 | 0.03431200  | -0.08313200 |
| H | -3.43329700 | 0.04394000  | -0.12426300 |

Int23

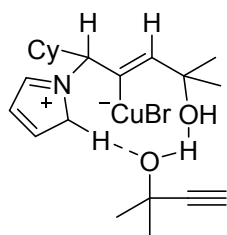

|    |             |             |             |
|----|-------------|-------------|-------------|
| C  | 1.56554200  | 0.69097400  | -1.09235500 |
| H  | 1.72815600  | 1.41365500  | -1.91019300 |
| C  | 0.45566400  | 1.11041600  | -0.13757200 |
| C  | -0.09932500 | 2.30645000  | -0.35111400 |
| N  | 1.05380500  | -0.53595900 | -1.76431100 |
| C  | 0.07034500  | -0.45065200 | -2.83717900 |
| H  | -0.73654900 | 0.22133900  | -2.50794900 |
| H  | 0.53232800  | -0.06088800 | -3.75046400 |
| C  | 1.05753500  | -1.73713200 | -1.26492200 |
| H  | 0.25700900  | 2.99306800  | -1.13188400 |
| H  | 1.64530700  | -2.00383300 | -0.39365900 |
| C  | 0.15558600  | -2.60290200 | -1.99605200 |
| C  | -0.42982700 | -1.84749600 | -2.94408700 |
| C  | -1.26731500 | 2.85582700  | 0.44620400  |
| H  | -0.00700500 | -3.64319200 | -1.75557100 |
| H  | -1.16845000 | -2.15896600 | -3.67082700 |
| O  | -1.90511200 | 1.74856100  | 1.10235000  |
| H  | -2.82338900 | 1.98867800  | 1.29069100  |
| C  | -0.77256100 | 3.83968600  | 1.50643800  |
| H  | -0.22134700 | 4.66364100  | 1.04298900  |
| H  | -1.61394900 | 4.26017600  | 2.06816300  |
| H  | -0.10775300 | 3.31686200  | 2.19831000  |
| C  | -2.26406500 | 3.51760100  | -0.50727200 |
| H  | -3.11442000 | 3.93312800  | 0.04625600  |
| H  | -1.78435000 | 4.33601200  | -1.05179300 |
| H  | -2.64286000 | 2.78268300  | -1.22362800 |
| Br | -0.00499500 | -2.63779700 | 1.89282900  |
| O  | -2.41481000 | 0.06421700  | -1.12033300 |
| H  | -1.98022200 | 0.56852300  | -0.40608100 |
| C  | -3.64094100 | -0.42869400 | -0.60089700 |
| C  | -3.38094200 | -1.32447000 | 0.61215100  |
| H  | -4.31575000 | -1.73317500 | 1.00496100  |
| H  | -2.71450800 | -2.14267200 | 0.32611300  |
| H  | -2.88920000 | -0.75546600 | 1.40733100  |
| Cu | -0.08876800 | -0.34641400 | 1.15481600  |
| C  | -4.30196900 | -1.20796300 | -1.73559600 |
| H  | -5.26631000 | -1.61033400 | -1.41908900 |

|   |             |             |             |
|---|-------------|-------------|-------------|
| H | -4.45143300 | -0.55568600 | -2.59881400 |
| H | -3.64468700 | -2.03527400 | -2.01823800 |
| C | -4.51836000 | 0.70148500  | -0.19935900 |
| C | -5.23310400 | 1.60936800  | 0.14992700  |
| H | -5.88207000 | 2.40536600  | 0.43757700  |
| C | 2.90655800  | 0.42406000  | -0.40036500 |
| C | 3.98660700  | -0.07897300 | -1.36694600 |
| C | 3.37531400  | 1.70419900  | 0.30289400  |
| H | 2.74051100  | -0.32940500 | 0.38636600  |
| C | 5.32208900  | -0.29610900 | -0.65212100 |
| H | 4.11923900  | 0.67044000  | -2.16132300 |
| H | 3.67244400  | -1.00611400 | -1.86042200 |
| C | 4.71338400  | 1.49132900  | 1.01243400  |
| H | 3.47930900  | 2.50150700  | -0.44909700 |
| H | 2.60792500  | 2.03208200  | 1.00999700  |
| C | 5.78488500  | 0.98260600  | 0.04684400  |
| H | 6.07718300  | -0.64076000 | -1.36600600 |
| H | 5.20333200  | -1.09281900 | 0.09446000  |
| H | 5.03610300  | 2.42389800  | 1.48613200  |
| H | 4.57611000  | 0.75747900  | 1.81776000  |
| H | 6.72636800  | 0.80702000  | 0.57708200  |
| H | 5.98417500  | 1.75374700  | -0.71012400 |

**TS12**

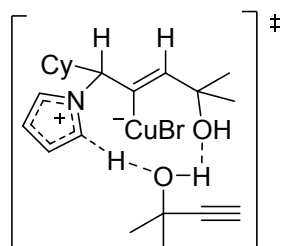

|   |             |             |             |
|---|-------------|-------------|-------------|
| C | -1.33293000 | -0.83570500 | -0.98666300 |
| H | -1.39354600 | -1.69358600 | -1.67751200 |
| C | -0.37809400 | -1.09821200 | 0.16943800  |
| C | 0.23612200  | -2.28569700 | 0.12902700  |
| N | -0.73400800 | 0.25152100  | -1.80049900 |
| C | 0.26374700  | 0.01515100  | -2.77281000 |
| H | 1.41542600  | -0.24595200 | -2.09224100 |
| H | 0.15385500  | -0.88266700 | -3.37650600 |
| C | -0.86160700 | 1.55648700  | -1.60989800 |
| H | 0.02526300  | -3.01136100 | -0.67008800 |
| H | -1.47586600 | 1.96065800  | -0.81383900 |
| C | -0.05496500 | 2.25782500  | -2.53720000 |
| C | 0.58577200  | 1.30799300  | -3.29999000 |

|    |             |             |             |
|----|-------------|-------------|-------------|
| C  | 1.36069200  | -2.73445000 | 1.03658500  |
| H  | 0.02823900  | 3.33253000  | -2.59866900 |
| H  | 1.27594500  | 1.47858700  | -4.11565200 |
| O  | 2.55999500  | -2.42120500 | 0.26700300  |
| H  | 3.34150400  | -2.37489200 | 0.83407500  |
| C  | 1.42279700  | -2.01935400 | 2.37938000  |
| H  | 0.49318600  | -2.17157500 | 2.93277000  |
| H  | 2.25025300  | -2.41602900 | 2.97976500  |
| H  | 1.56798900  | -0.94305700 | 2.25826900  |
| C  | 1.32359900  | -4.24661200 | 1.23531200  |
| H  | 2.18893700  | -4.58556700 | 1.81394600  |
| H  | 0.41465100  | -4.53408800 | 1.77104700  |
| H  | 1.33454200  | -4.75229000 | 0.26638700  |
| Br | -0.16608400 | 2.76375500  | 2.14592000  |
| O  | 2.53818800  | -0.62429200 | -1.56484100 |
| H  | 2.42250500  | -1.34498500 | -0.85683500 |
| C  | 3.44124400  | 0.37991300  | -1.03890700 |
| C  | 2.73103900  | 1.21809500  | 0.01970100  |
| H  | 3.39564300  | 1.99193100  | 0.41025400  |
| H  | 1.84774200  | 1.70071300  | -0.41244400 |
| H  | 2.40917200  | 0.58720200  | 0.85121300  |
| Cu | -0.21161500 | 0.53817000  | 1.33252900  |
| C  | 3.91754700  | 1.23014600  | -2.21408000 |
| H  | 4.69686900  | 1.91597300  | -1.87674000 |
| H  | 4.32001200  | 0.59056200  | -3.00199100 |
| H  | 3.08363700  | 1.81851600  | -2.60282600 |
| C  | 4.59339800  | -0.32970400 | -0.44610100 |
| C  | 5.54717800  | -0.87382900 | 0.05080000  |
| H  | 6.40541700  | -1.34393500 | 0.47588000  |
| C  | -2.75927000 | -0.48349100 | -0.54710200 |
| C  | -3.69420600 | -0.19900900 | -1.72959500 |
| C  | -3.31654800 | -1.62810500 | 0.30837300  |
| H  | -2.71355400 | 0.40806700  | 0.09918000  |
| C  | -5.11907700 | 0.09869200  | -1.25738100 |
| H  | -3.70706700 | -1.08370300 | -2.38341600 |
| H  | -3.31817500 | 0.63351400  | -2.33474100 |
| C  | -4.74331000 | -1.33682600 | 0.77506700  |
| H  | -3.30491800 | -2.55136200 | -0.29112400 |
| H  | -2.65643900 | -1.79846500 | 1.16411600  |
| C  | -5.66925600 | -1.04680300 | -0.40712200 |
| H  | -5.76776300 | 0.28489600  | -2.11952100 |
| H  | -5.11311800 | 1.02021500  | -0.65988800 |
| H  | -5.12251000 | -2.17954600 | 1.36206700  |
| H  | -4.72838900 | -0.46593000 | 1.44390600  |

|   |             |             |             |
|---|-------------|-------------|-------------|
| H | -6.67830500 | -0.80990200 | -0.05466100 |
| H | -5.75202200 | -1.94853400 | -1.02956400 |

**Int24**

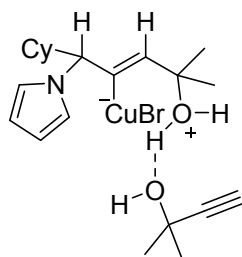

|    |             |             |             |
|----|-------------|-------------|-------------|
| C  | 1.67763000  | 1.03225800  | 0.76073800  |
| H  | 1.97383000  | 1.64388000  | 1.62914400  |
| C  | 0.61719700  | 0.00851000  | 1.12515800  |
| C  | 0.03855600  | 0.15112600  | 2.32361500  |
| N  | 1.05281900  | 1.98284900  | -0.17778500 |
| C  | 0.61594800  | 3.23407900  | 0.15213000  |
| H  | -1.30244800 | 1.44068800  | -0.37809000 |
| H  | 0.81608700  | 3.63901200  | 1.13324800  |
| C  | 0.65191800  | 1.69007800  | -1.45696900 |
| H  | 0.34923300  | 0.90469500  | 3.05737400  |
| H  | 0.90113700  | 0.74688500  | -1.92330800 |
| C  | -0.04212100 | 2.78164300  | -1.94932800 |
| C  | -0.06337500 | 3.76462900  | -0.92350300 |
| C  | -1.15742700 | -0.67345200 | 2.74885000  |
| H  | -0.44678300 | 2.86884700  | -2.94821500 |
| H  | -0.50813700 | 4.74774600  | -0.97153000 |
| O  | -2.04513600 | -0.72407700 | 1.54377000  |
| H  | -2.96442100 | -0.95969700 | 1.75061100  |
| C  | -0.81770200 | -2.12098600 | 3.06142000  |
| H  | -0.13813200 | -2.15257100 | 3.91666600  |
| H  | -1.71388300 | -2.70170100 | 3.30591700  |
| H  | -0.31672500 | -2.56949400 | 2.19991100  |
| C  | -1.94669300 | 0.00770100  | 3.85592300  |
| H  | -2.84354100 | -0.56375700 | 4.11901900  |
| H  | -1.32380500 | 0.08284800  | 4.75061800  |
| H  | -2.23730000 | 1.01774000  | 3.55267500  |
| Br | -0.77394400 | -2.70055600 | -2.02231000 |
| O  | -2.09166600 | 1.25760700  | 0.17830700  |
| H  | -1.99294300 | 0.21876000  | 0.89553200  |
| C  | -3.29670000 | 1.25390700  | -0.64411500 |
| C  | -3.06582900 | 0.39243700  | -1.88180400 |
| H  | -3.97142300 | 0.37037000  | -2.49183000 |
| H  | -2.25256700 | 0.82594800  | -2.47230200 |

|    |             |             |             |
|----|-------------|-------------|-------------|
| H  | -2.78642600 | -0.63065200 | -1.61553400 |
| Cu | 0.05036500  | -1.31034800 | -0.29426700 |
| C  | -3.62930400 | 2.70279000  | -0.98686700 |
| H  | -4.55723200 | 2.74334800  | -1.56096900 |
| H  | -3.74230300 | 3.28976400  | -0.07368500 |
| H  | -2.81562000 | 3.12248000  | -1.58338500 |
| C  | -4.34810100 | 0.67455200  | 0.21577900  |
| C  | -5.21872700 | 0.19849300  | 0.90044200  |
| H  | -6.01550200 | -0.20445400 | 1.48555800  |
| C  | 2.94315100  | 0.41332700  | 0.16050500  |
| C  | 3.95489400  | 1.47484800  | -0.28119800 |
| C  | 3.57503400  | -0.55550900 | 1.16560800  |
| H  | 2.64289300  | -0.17612400 | -0.72163900 |
| C  | 5.22524600  | 0.83499500  | -0.84427400 |
| H  | 4.21657100  | 2.09511300  | 0.58968300  |
| H  | 3.50131700  | 2.14357900  | -1.02093900 |
| C  | 4.84811300  | -1.19160300 | 0.60522700  |
| H  | 3.81655300  | 0.00063000  | 2.08468600  |
| H  | 2.84670900  | -1.32613500 | 1.44204300  |
| C  | 5.85423600  | -0.12594800 | 0.16631900  |
| H  | 5.94148700  | 1.61107600  | -1.13365800 |
| H  | 4.97191400  | 0.28070700  | -1.75807600 |
| H  | 5.29510800  | -1.85761100 | 1.35057100  |
| H  | 4.58324000  | -1.81602200 | -0.25860900 |
| H  | 6.74773100  | -0.59552700 | -0.25815900 |
| H  | 6.18184300  | 0.44375800  | 1.04717800  |

**Int25**

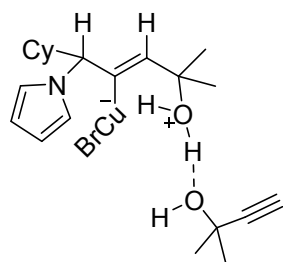

|   |             |            |             |
|---|-------------|------------|-------------|
| C | -2.38543500 | 1.07237700 | 0.03267100  |
| H | -2.81446100 | 2.01454400 | -0.34489500 |
| C | -0.88233600 | 1.04449300 | -0.17022600 |
| C | -0.31813500 | 2.10764600 | -0.75744400 |
| N | -2.68672000 | 1.05646500 | 1.46517200  |
| C | -3.21144300 | 2.10549600 | 2.16824900  |
| H | -3.45735400 | 3.02889900 | 1.66436100  |
| C | -2.46584400 | 0.01082700 | 2.32435100  |
| H | -0.89032800 | 2.96920200 | -1.11742000 |



|    |             |             |             |
|----|-------------|-------------|-------------|
| H  | -2.06466500 | -0.92992700 | 1.97264900  |
| C  | -2.85828400 | 0.39842100  | 3.58634800  |
| C  | -3.33304800 | 1.73206300  | 3.48763000  |
| C  | 1.18338300  | 2.23364500  | -0.92430800 |
| H  | -2.81491900 | -0.21424500 | 4.47479400  |
| H  | -3.72361000 | 2.34601100  | 4.28554800  |
| O  | 1.76924100  | 1.80729500  | 0.39477900  |
| H  | 2.49719600  | 0.99447800  | 0.37650700  |
| C  | 1.74973500  | 1.30561700  | -1.98937600 |
| H  | 1.31976300  | 1.58239100  | -2.95515900 |
| H  | 2.83933100  | 1.39646100  | -2.05279700 |
| H  | 1.46931800  | 0.26750700  | -1.78204500 |
| C  | 1.63304200  | 3.66998400  | -1.11575100 |
| H  | 2.72432700  | 3.72991800  | -1.13655800 |
| H  | 1.24057400  | 4.04711800  | -2.06389100 |
| H  | 1.25457700  | 4.29846600  | -0.30637200 |
| Br | 1.36454200  | -2.64752200 | 0.67256400  |
| H  | 0.99001000  | 1.50946900  | 0.91953000  |
| Cu | 0.00806400  | -0.70995400 | 0.29154100  |
| O  | 3.29684000  | -0.07085200 | 0.53799000  |
| H  | 2.83566500  | -0.94195100 | 0.63419800  |
| C  | 4.59894900  | -0.24526100 | -0.06545000 |
| C  | 4.48023700  | -1.17311900 | -1.27502600 |
| H  | 5.46043400  | -1.30469100 | -1.73793700 |
| H  | 4.10259000  | -2.14754300 | -0.95123800 |
| H  | 3.79198300  | -0.75900800 | -2.01412000 |
| C  | 5.53150200  | -0.82321800 | 0.99770000  |
| H  | 6.53857000  | -0.94214000 | 0.59241300  |
| H  | 5.56781700  | -0.16051700 | 1.86366200  |
| H  | 5.15516700  | -1.80178500 | 1.30979600  |
| C  | 5.04362000  | 1.09914500  | -0.47267300 |
| C  | 5.42172800  | 2.19149200  | -0.81176400 |
| H  | 5.76957200  | 3.15610400  | -1.10689500 |
| C  | -3.09911000 | -0.08343600 | -0.68856800 |
| C  | -4.60811300 | -0.06641700 | -0.42363200 |
| C  | -2.81257800 | -0.04560800 | -2.19324000 |
| H  | -2.69091400 | -1.02965400 | -0.29335600 |
| C  | -5.32025700 | -1.20154200 | -1.16176100 |
| H  | -5.01189600 | 0.89865900  | -0.76611600 |
| H  | -4.79931600 | -0.12736500 | 0.65284000  |
| C  | -3.53028100 | -1.17739900 | -2.93155700 |
| H  | -3.15192300 | 0.92423200  | -2.58946200 |
| H  | -1.73236500 | -0.09711100 | -2.37011100 |
| C  | -5.03592500 | -1.15012000 | -2.66351500 |

|   |             |             |             |
|---|-------------|-------------|-------------|
| H | -6.39769400 | -1.15446500 | -0.97290600 |
| H | -4.97063600 | -2.16312900 | -0.76177500 |
| H | -3.32977600 | -1.11114800 | -4.00609900 |
| H | -3.12169000 | -2.13888400 | -2.59165600 |
| H | -5.53033800 | -1.98149400 | -3.17667900 |
| H | -5.45786700 | -0.22380000 | -3.07752800 |

TS13

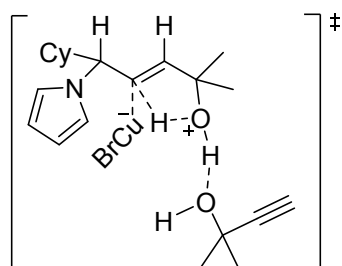

|    |             |             |             |
|----|-------------|-------------|-------------|
| C  | -2.10372300 | 1.19897700  | -0.42135100 |
| H  | -2.67489600 | 1.75573500  | -1.17932000 |
| C  | -0.66476700 | 1.04341700  | -0.86613100 |
| C  | -0.26719200 | 1.42440900  | -2.08290900 |
| N  | -2.15375100 | 2.01535700  | 0.78996000  |
| C  | -2.84992900 | 3.18551100  | 0.92686000  |
| H  | -3.37088000 | 3.61202200  | 0.08197600  |
| C  | -1.59634100 | 1.68410200  | 1.99804500  |
| H  | -0.91258000 | 1.83073300  | -2.86517800 |
| H  | -1.00831600 | 0.78359800  | 2.11406400  |
| C  | -1.93655200 | 2.65584200  | 2.91129600  |
| C  | -2.73387900 | 3.61245300  | 2.22961800  |
| C  | 1.23359900  | 1.41654000  | -2.36141600 |
| H  | -1.64041700 | 2.67595300  | 3.94983100  |
| H  | -3.16818400 | 4.51095400  | 2.64191800  |
| O  | 1.80171300  | 1.41807800  | -1.01222200 |
| H  | 2.44688100  | 0.63429200  | -0.81068100 |
| C  | 1.69266400  | 0.16196400  | -3.09641400 |
| H  | 1.22642500  | 0.12657900  | -4.08441200 |
| H  | 2.77944600  | 0.15553700  | -3.22312500 |
| H  | 1.39033900  | -0.73709900 | -2.54782200 |
| C  | 1.68473900  | 2.69476900  | -3.04679100 |
| H  | 2.77179200  | 2.70364200  | -3.16084500 |
| H  | 1.22643800  | 2.76513700  | -4.03737100 |
| H  | 1.38291200  | 3.56284800  | -2.45680200 |
| Br | 1.03190000  | -2.77854900 | 0.64458900  |
| H  | 0.81917700  | 1.24392800  | -0.45099900 |
| Cu | 0.09906400  | -0.67815800 | 0.04288800  |
| O  | 3.28781800  | -0.47710600 | -0.30008600 |

|   |             |             |             |
|---|-------------|-------------|-------------|
| H | 2.79271800  | -1.30512000 | -0.12106700 |
| C | 3.95232200  | -0.07802900 | 0.92412800  |
| C | 4.78438400  | -1.25724000 | 1.42380000  |
| H | 5.33512700  | -0.97407900 | 2.32306300  |
| H | 4.11899900  | -2.09291000 | 1.66346800  |
| H | 5.49303800  | -1.56645800 | 0.65351200  |
| C | 2.91362700  | 0.35666200  | 1.96313500  |
| H | 3.41535500  | 0.69782900  | 2.87153300  |
| H | 2.30586400  | 1.18300800  | 1.58093700  |
| H | 2.26741000  | -0.49120400 | 2.21006300  |
| C | 4.81444300  | 1.05819600  | 0.55821600  |
| C | 5.51384600  | 1.99872800  | 0.28388500  |
| H | 6.13459300  | 2.83092100  | 0.03972000  |
| C | -2.82259200 | -0.14706900 | -0.19302500 |
| C | -4.25724600 | 0.06260400  | 0.30344800  |
| C | -2.80548600 | -1.01333600 | -1.45749100 |
| H | -2.27918400 | -0.69117700 | 0.60205100  |
| C | -4.97287400 | -1.27218200 | 0.52149800  |
| H | -4.80421200 | 0.65123900  | -0.44898100 |
| H | -4.25098500 | 0.65074900  | 1.22713500  |
| C | -3.52482400 | -2.34512000 | -1.23624300 |
| H | -3.29808400 | -0.45568700 | -2.26905300 |
| H | -1.77466300 | -1.19596000 | -1.78655500 |
| C | -4.95691800 | -2.12624100 | -0.74679900 |
| H | -6.00097700 | -1.09452600 | 0.85316300  |
| H | -4.46925500 | -1.81870900 | 1.33021300  |
| H | -3.51833800 | -2.93106900 | -2.16075600 |
| H | -2.96829900 | -2.92659200 | -0.48859400 |
| H | -5.44860200 | -3.08766600 | -0.56697100 |
| H | -5.53181700 | -1.61568200 | -1.53189400 |

**Int26**

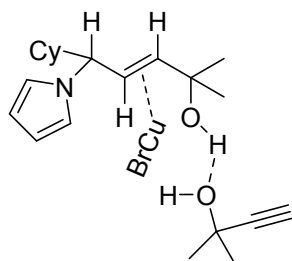

|   |             |             |             |
|---|-------------|-------------|-------------|
| C | -2.15298600 | 0.14999100  | -0.18883300 |
| H | -2.07558800 | -0.16711400 | -1.23762000 |
| C | -0.93431100 | 0.98913200  | 0.15878800  |
| C | -0.35943900 | 1.83868300  | -0.72144200 |
| N | -3.34025400 | 0.99305000  | -0.11452500 |

|    |             |             |             |
|----|-------------|-------------|-------------|
| C  | -4.23873500 | 1.18569900  | -1.13042800 |
| H  | -4.07649400 | 0.73151200  | -2.09738600 |
| C  | -3.77827900 | 1.65241300  | 1.00560200  |
| H  | -0.74274300 | 1.88278000  | -1.74423100 |
| H  | -3.20596500 | 1.63031700  | 1.92176100  |
| C  | -4.96557500 | 2.27544700  | 0.69835800  |
| C  | -5.25934900 | 1.97783600  | -0.65901100 |
| C  | 0.64637900  | 2.90829600  | -0.32126300 |
| H  | -5.55315300 | 2.88133900  | 1.37208500  |
| H  | -6.11817500 | 2.30450700  | -1.22612200 |
| O  | 1.23815500  | 2.58271300  | 0.92034500  |
| H  | 2.04620700  | 2.07230800  | 0.75736100  |
| C  | 1.70294500  | 3.09198000  | -1.41196400 |
| H  | 1.23885400  | 3.37861900  | -2.35976100 |
| H  | 2.40038700  | 3.87821400  | -1.11126700 |
| H  | 2.27122800  | 2.16962500  | -1.57387300 |
| C  | -0.13913300 | 4.20489600  | -0.10460200 |
| H  | 0.55744500  | 5.00574700  | 0.15526500  |
| H  | -0.69172500 | 4.48889200  | -1.00420700 |
| H  | -0.84966300 | 4.07076200  | 0.71471200  |
| Br | 1.97268300  | -1.68432900 | -2.12103000 |
| H  | -0.62032600 | 1.04560200  | 1.20342100  |
| Cu | 0.86147400  | -0.07530700 | -0.70163400 |
| O  | 3.08517000  | 0.44066700  | 0.11885500  |
| H  | 3.29794200  | -0.13292000 | -0.64150000 |
| C  | 3.55726700  | -0.20528000 | 1.31732800  |
| C  | 4.86183500  | -0.94012800 | 1.01197900  |
| H  | 5.25835300  | -1.40381200 | 1.91744500  |
| H  | 4.67010600  | -1.72226700 | 0.26950600  |
| H  | 5.60229000  | -0.24045400 | 0.61916400  |
| C  | 2.48064100  | -1.16254300 | 1.83396600  |
| H  | 2.79988400  | -1.63966300 | 2.76377200  |
| H  | 1.56356300  | -0.59798300 | 2.03531300  |
| H  | 2.28373800  | -1.93254900 | 1.07987000  |
| C  | 3.77685600  | 0.87256500  | 2.29827300  |
| C  | 3.92452300  | 1.75598300  | 3.10309300  |
| H  | 4.05746500  | 2.53980000  | 3.81403800  |
| C  | -2.31035800 | -1.10715000 | 0.68286100  |
| C  | -3.59784500 | -1.85630300 | 0.32367000  |
| C  | -1.09289200 | -2.02668100 | 0.54987000  |
| H  | -2.38427900 | -0.77945200 | 1.73278800  |
| C  | -3.75108000 | -3.14252300 | 1.13768800  |
| H  | -3.56669600 | -2.10790700 | -0.74744000 |
| H  | -4.46221000 | -1.20098700 | 0.47235700  |

|   |             |             |             |
|---|-------------|-------------|-------------|
| C | -1.25239300 | -3.31873700 | 1.35501800  |
| H | -0.93263400 | -2.27383200 | -0.51061500 |
| H | -0.18717300 | -1.50941400 | 0.89547100  |
| C | -2.53551800 | -4.05413300 | 0.96846700  |
| H | -4.66694700 | -3.66307400 | 0.84109100  |
| H | -3.86388700 | -2.88435800 | 2.19962000  |
| H | -0.37687500 | -3.95713500 | 1.20004600  |
| H | -1.28628200 | -3.07184800 | 2.42498100  |
| H | -2.64850700 | -4.96123600 | 1.57074800  |
| H | -2.46493500 | -4.37366400 | -0.07981200 |

**CuBr-6**

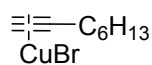

|    |             |             |             |
|----|-------------|-------------|-------------|
| C  | 3.11586200  | 0.27685700  | 0.87621300  |
| C  | 2.59534600  | 1.19238100  | 0.26199900  |
| C  | 2.04097500  | 2.34317500  | -0.46874700 |
| H  | 2.08439900  | 3.21113000  | 0.19902400  |
| H  | 2.70672600  | 2.54781100  | -1.31337900 |
| C  | 0.59911500  | 2.12497500  | -0.95984200 |
| H  | 0.33412500  | 2.96535100  | -1.60964900 |
| H  | 0.56674400  | 1.22475600  | -1.58900600 |
| C  | -0.42391100 | 2.00493200  | 0.16807700  |
| H  | -0.08465200 | 1.26945500  | 0.91426600  |
| H  | -0.49180300 | 2.96081400  | 0.70459900  |
| C  | -1.79932200 | 1.57590100  | -0.33605400 |
| H  | -2.21159900 | 2.35543900  | -0.99145800 |
| H  | -1.68481200 | 0.66917700  | -0.94336900 |
| C  | -2.77468700 | 1.27542000  | 0.79843400  |
| H  | -2.33283200 | 0.50035800  | 1.43729900  |
| H  | -2.90517200 | 2.16929700  | 1.42238300  |
| C  | -4.12558600 | 0.79165200  | 0.28059900  |
| H  | -4.81838300 | 0.58345000  | 1.09977300  |
| H  | -4.58871900 | 1.54016900  | -0.37061700 |
| H  | -4.00078700 | -0.12872100 | -0.29775100 |
| H  | 3.69450800  | -0.41744000 | 1.44982700  |
| Cu | 1.28275200  | -0.66436600 | 0.17914100  |
| Br | -0.53812300 | -2.04846300 | -0.25803100 |

**Int27**

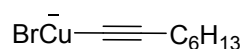

|   |             |            |             |
|---|-------------|------------|-------------|
| C | 0.76888900  | 1.95551300 | -0.11562000 |
| C | -0.28372600 | 1.32843200 | -0.08001300 |

|    |             |             |             |
|----|-------------|-------------|-------------|
| Cu | -1.97507700 | 0.34021400  | -0.02372900 |
| Br | -4.04261100 | -0.84907700 | 0.04129200  |
| C  | 2.06196100  | 2.64911400  | -0.14410900 |
| H  | 2.32918900  | 2.91605600  | -1.17763300 |
| H  | 2.00215000  | 3.59731200  | 0.40691100  |
| C  | 3.19878200  | 1.80007900  | 0.44886700  |
| H  | 4.13252600  | 2.38067400  | 0.44278900  |
| H  | 2.96115400  | 1.58038500  | 1.49707200  |
| C  | 3.40157500  | 0.48851500  | -0.30184600 |
| H  | 2.44556500  | -0.04821100 | -0.31506400 |
| H  | 3.65073000  | 0.70696100  | -1.35066400 |
| C  | 4.49198400  | -0.38996700 | 0.30477300  |
| H  | 4.23975000  | -0.60988600 | 1.35164400  |
| H  | 5.44382700  | 0.16157500  | 0.32996000  |
| C  | 4.69301800  | -1.70373000 | -0.44688800 |
| H  | 3.74342800  | -2.25186500 | -0.46746700 |
| H  | 4.94215300  | -1.48495400 | -1.49313300 |
| C  | 5.78171800  | -2.57774700 | 0.17020300  |
| H  | 5.91222000  | -3.51519900 | -0.37818100 |
| H  | 6.74421900  | -2.05488700 | 0.17687700  |
| H  | 5.53650300  | -2.82774000 | 1.20760300  |

**Int28**

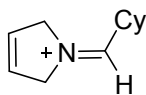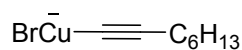

|   |             |             |             |
|---|-------------|-------------|-------------|
| C | -1.13452600 | -0.83368300 | 1.22431400  |
| C | -0.36762100 | 1.62283800  | -1.40321000 |
| C | 0.59763800  | 2.37947300  | -1.38278200 |
| H | -1.88783900 | -1.62085100 | 1.17324900  |
| C | 0.23355100  | -1.09619900 | 0.70315100  |
| C | 1.08360300  | -1.66682700 | 1.86499100  |
| C | 0.18737100  | -2.09136300 | -0.46685200 |
| H | 0.67217000  | -0.15144600 | 0.35185000  |
| C | 2.49311100  | -1.99665900 | 1.37140300  |
| H | 0.60417400  | -2.57845300 | 2.24707800  |
| H | 1.12448800  | -0.95175600 | 2.69468600  |
| C | 1.59857800  | -2.43575100 | -0.94152900 |
| H | -0.33170700 | -3.00333800 | -0.13877600 |
| H | -0.39896300 | -1.66867800 | -1.28843100 |
| C | 2.46013000  | -2.97787400 | 0.19956800  |
| H | 3.08568600  | -2.39989000 | 2.19921300  |
| H | 2.97940800  | -1.06649500 | 1.04891000  |

|    |             |             |             |
|----|-------------|-------------|-------------|
| H  | 1.54073200  | -3.16116700 | -1.75814300 |
| H  | 2.06051200  | -1.52950000 | -1.35589600 |
| H  | 3.47939300  | -3.17698800 | -0.14894600 |
| H  | 2.04907400  | -3.93706900 | 0.54234300  |
| Cu | -1.95284800 | 0.47751100  | -1.40330900 |
| Br | -3.69418700 | -1.09100400 | -0.92187400 |
| N  | -1.49727500 | 0.25641000  | 1.79999600  |
| C  | -2.87882900 | 0.47850500  | 2.29712400  |
| C  | -0.66822100 | 1.48122600  | 1.91814300  |
| C  | -2.83281700 | 1.91460500  | 2.72482100  |
| C  | -1.63466800 | 2.45299500  | 2.52749900  |
| H  | -0.33452900 | 1.77734600  | 0.91077700  |
| H  | 0.20434700  | 1.27378900  | 2.54816400  |
| H  | -1.35158400 | 3.47575100  | 2.73950700  |
| H  | -3.70234900 | 2.41667500  | 3.12814800  |
| H  | -3.57118500 | 0.27170800  | 1.46998400  |
| H  | -3.08761900 | -0.21615200 | 3.11749600  |
| C  | 1.75129200  | 3.28913800  | -1.35836200 |
| H  | 2.13543600  | 3.42484400  | -2.37776800 |
| H  | 1.43013600  | 4.28097000  | -1.01826200 |
| C  | 2.89172400  | 2.78447600  | -0.46067800 |
| H  | 3.67363200  | 3.55188300  | -0.40275700 |
| H  | 2.50816700  | 2.64583800  | 0.55981100  |
| C  | 3.49227100  | 1.47435100  | -0.95719300 |
| H  | 2.68303400  | 0.73884700  | -1.06557400 |
| H  | 3.90406600  | 1.62255300  | -1.96490900 |
| C  | 4.57544300  | 0.91258900  | -0.04164600 |
| H  | 5.37994300  | 1.64932200  | 0.08673200  |
| H  | 4.15405900  | 0.75413400  | 0.96219600  |
| C  | 5.16326000  | -0.39861700 | -0.56141100 |
| H  | 4.34224000  | -1.07147100 | -0.84407100 |
| H  | 5.71889100  | -0.20104100 | -1.48596700 |
| C  | 6.06515000  | -1.09299400 | 0.45389600  |
| H  | 6.48975700  | -2.01678000 | 0.05191100  |
| H  | 6.89463900  | -0.44400500 | 0.75197000  |
| H  | 5.50320900  | -1.34747800 | 1.35957000  |

**TS14**

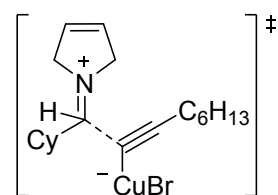

|   |             |            |            |
|---|-------------|------------|------------|
| C | -0.66386700 | 0.28876700 | 0.93968900 |
|---|-------------|------------|------------|

|    |             |             |             |
|----|-------------|-------------|-------------|
| C  | -0.61548100 | 0.65130900  | -1.29077400 |
| C  | 0.24611800  | 1.42257300  | -1.71010700 |
| H  | -1.48493300 | -0.43072800 | 0.94180300  |
| C  | 0.71189800  | -0.28381000 | 1.12111600  |
| C  | 0.91996000  | -0.50840400 | 2.63708600  |
| C  | 0.87060600  | -1.60988400 | 0.36714100  |
| H  | 1.46064200  | 0.43344700  | 0.75727000  |
| C  | 2.28601600  | -1.13932200 | 2.91146700  |
| H  | 0.12926900  | -1.17604000 | 3.00611000  |
| H  | 0.81508300  | 0.43677400  | 3.18083000  |
| C  | 2.22686700  | -2.25114900 | 0.65972200  |
| H  | 0.06448600  | -2.28938300 | 0.68134700  |
| H  | 0.74149300  | -1.43489100 | -0.70426700 |
| C  | 2.44411500  | -2.46009600 | 2.15819000  |
| H  | 2.41157700  | -1.28898300 | 3.98835400  |
| H  | 3.07381100  | -0.44274000 | 2.59140100  |
| H  | 2.31164900  | -3.19952600 | 0.12028100  |
| H  | 3.01913500  | -1.59521200 | 0.27467200  |
| H  | 3.43462100  | -2.88758000 | 2.34410800  |
| H  | 1.70799900  | -3.18146800 | 2.53671200  |
| Cu | -2.25469800 | -0.47271800 | -1.28582800 |
| Br | -4.11251300 | -1.64425900 | -0.44271700 |
| N  | -1.00038400 | 1.48551600  | 1.36473900  |
| C  | -2.40146900 | 1.93681100  | 1.31852700  |
| C  | -0.06865800 | 2.61435700  | 1.39557600  |
| C  | -2.26553700 | 3.41711300  | 1.52315900  |
| C  | -0.99070700 | 3.78871600  | 1.56783900  |
| H  | 0.47152300  | 2.64040800  | 0.43512500  |
| H  | 0.66274900  | 2.50192200  | 2.20382000  |
| H  | -0.62029300 | 4.79821500  | 1.69120300  |
| H  | -3.12574400 | 4.06934300  | 1.60145000  |
| H  | -2.82962100 | 1.68234400  | 0.33634800  |
| H  | -2.99280300 | 1.43040700  | 2.08799500  |
| C  | 1.29132400  | 2.31228400  | -2.23297300 |
| H  | 1.39963200  | 2.13684600  | -3.31081000 |
| H  | 0.98062800  | 3.35757300  | -2.11824600 |
| C  | 2.65149300  | 2.09200800  | -1.55002800 |
| H  | 3.35410000  | 2.85528000  | -1.90432700 |
| H  | 2.54330700  | 2.25013200  | -0.46748300 |
| C  | 3.22939900  | 0.70334700  | -1.80540800 |
| H  | 2.45926900  | -0.05290200 | -1.59808800 |
| H  | 3.47394400  | 0.60557200  | -2.87178300 |
| C  | 4.46639700  | 0.40841000  | -0.96224000 |
| H  | 5.18835900  | 1.23166300  | -1.05130800 |



|   |            |             |             |
|---|------------|-------------|-------------|
| H | 4.17503500 | 0.37893900  | 0.09934500  |
| C | 5.14925500 | -0.90509200 | -1.34178700 |
| H | 4.39170500 | -1.69196300 | -1.44761800 |
| H | 5.60901700 | -0.79450900 | -2.33108900 |
| C | 6.19692200 | -1.33651300 | -0.32067800 |
| H | 6.70205800 | -2.25704800 | -0.62318500 |
| H | 6.95872300 | -0.56177900 | -0.18823500 |
| H | 5.73254200 | -1.51337700 | 0.65609600  |

**Int29**

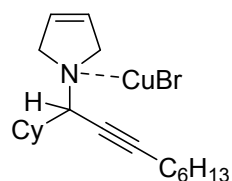

|   |             |             |             |
|---|-------------|-------------|-------------|
| C | 1.73660600  | -0.65814100 | 1.38708300  |
| H | 2.10549000  | -1.02920800 | 2.35944600  |
| C | 1.03183100  | -1.73845700 | 0.68102600  |
| C | 0.37192200  | -2.52640000 | 0.04508800  |
| N | 0.73478100  | 0.40951400  | 1.64705200  |
| C | -0.31651500 | -0.01887600 | 2.61345800  |
| H | -1.07600300 | -0.63125700 | 2.12092500  |
| H | 0.13080900  | -0.62585700 | 3.42050600  |
| C | 1.29425400  | 1.65632800  | 2.22992100  |
| H | 1.71960100  | 2.29449300  | 1.45067200  |
| H | 2.09261900  | 1.42307000  | 2.95636800  |
| C | 0.09871100  | 2.24402800  | 2.93333500  |
| C | -0.81050900 | 1.29782600  | 3.14987300  |
| H | 0.03922000  | 3.28339000  | 3.23063000  |
| H | -1.75843000 | 1.41321500  | 3.66016200  |
| C | 2.96546700  | -0.15880400 | 0.59430300  |
| C | 3.96971400  | -1.30713500 | 0.42329900  |
| C | 2.61513800  | 0.45709300  | -0.76442600 |
| H | 3.45220100  | 0.61266300  | 1.20975000  |
| C | 5.22308600  | -0.85170700 | -0.32644700 |
| H | 3.48386000  | -2.11526800 | -0.13870600 |
| H | 4.23649500  | -1.71724000 | 1.40513500  |
| C | 3.86896200  | 0.89134700  | -1.52819100 |
| H | 2.05484000  | -0.27889300 | -1.35807500 |
| H | 1.96129700  | 1.33094100  | -0.64647200 |
| C | 4.85794400  | -0.26260800 | -1.68916800 |
| H | 5.91321600  | -1.69346100 | -0.44131900 |
| H | 5.74724200  | -0.09040700 | 0.26758600  |
| H | 3.57899200  | 1.29346400  | -2.50327900 |

|    |             |             |             |
|----|-------------|-------------|-------------|
| H  | 4.35843800  | 1.70846800  | -0.98024200 |
| H  | 5.75743300  | 0.07635000  | -2.21284800 |
| H  | 4.40244100  | -1.04547400 | -2.31025900 |
| Cu | -0.32082300 | 0.84073200  | -0.10333800 |
| Br | -1.38680200 | 1.58039700  | -2.05712200 |
| C  | -0.51052900 | -3.42346200 | -0.70753600 |
| H  | -0.41008300 | -3.19512700 | -1.77500600 |
| H  | -0.18730700 | -4.46005900 | -0.56740300 |
| C  | -1.98006700 | -3.25433200 | -0.28073400 |
| H  | -2.08738400 | -3.57560600 | 0.76259500  |
| H  | -2.59660200 | -3.92720200 | -0.88747200 |
| C  | -2.46771900 | -1.81698500 | -0.42753800 |
| H  | -1.80936700 | -1.16631700 | 0.16525500  |
| H  | -2.34966200 | -1.47415600 | -1.46333600 |
| C  | -3.90256100 | -1.59069300 | 0.03486900  |
| H  | -4.59638700 | -2.12765300 | -0.62619500 |
| H  | -4.03884100 | -2.02269900 | 1.03743900  |
| C  | -4.26481300 | -0.10690100 | 0.06654600  |
| H  | -4.08477800 | 0.33286600  | -0.92068900 |
| H  | -3.57072300 | 0.41211500  | 0.74413800  |
| C  | -5.70392900 | 0.14018900  | 0.50689700  |
| H  | -5.93486300 | 1.20792800  | 0.53723400  |
| H  | -6.40872000 | -0.33406700 | -0.18352100 |
| H  | -5.88851400 | -0.27458400 | 1.50370600  |

**Int30**

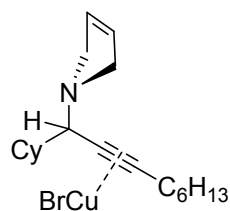

|   |             |             |             |
|---|-------------|-------------|-------------|
| C | -2.18072000 | -0.06941400 | 0.35109000  |
| H | -1.96146400 | 0.22699800  | 1.38703800  |
| C | -1.08202400 | -0.98864000 | -0.10333000 |
| C | -0.33792500 | -1.84244100 | -0.56517600 |
| N | -3.45345200 | -0.75481700 | 0.36177200  |
| C | -3.58568500 | -1.82074600 | 1.36130400  |
| H | -2.62528200 | -2.33114700 | 1.55921800  |
| H | -3.94287300 | -1.41325400 | 2.31536000  |
| C | -3.94499600 | -1.23575900 | -0.93379400 |
| H | -3.12524000 | -1.51966100 | -1.61960000 |
| H | -4.53682200 | -0.46110100 | -1.43950700 |
| C | -4.75896400 | -2.44230100 | -0.55554700 |

|    |             |             |             |
|----|-------------|-------------|-------------|
| C  | -4.56006700 | -2.76660700 | 0.71746600  |
| H  | -5.39607700 | -2.96442900 | -1.25920800 |
| H  | -5.00564100 | -3.60214300 | 1.24366700  |
| Cu | 0.83538100  | -0.39756600 | 0.75654400  |
| Br | 2.55532500  | 0.65966500  | 1.93272100  |
| C  | -2.21732700 | 1.21945200  | -0.49417600 |
| C  | -3.31270700 | 2.15325000  | 0.03405500  |
| C  | -0.85951300 | 1.93270200  | -0.50912300 |
| H  | -2.46217400 | 0.93783700  | -1.53015100 |
| C  | -3.36773300 | 3.46260900  | -0.75360300 |
| H  | -3.09609900 | 2.37585600  | 1.08950500  |
| H  | -4.27770800 | 1.63907100  | 0.01455000  |
| C  | -0.91897900 | 3.25280500  | -1.28140000 |
| H  | -0.54018500 | 2.12950700  | 0.52669800  |
| H  | -0.09537600 | 1.28831600  | -0.96329600 |
| C  | -2.01315100 | 4.17145700  | -0.73771800 |
| H  | -4.14734300 | 4.11166600  | -0.34238200 |
| H  | -3.65040500 | 3.24766700  | -1.79345900 |
| H  | 0.05706500  | 3.74539800  | -1.23946300 |
| H  | -1.12349200 | 3.03676200  | -2.33887200 |
| H  | -2.05579100 | 5.09685000  | -1.32085500 |
| H  | -1.76584400 | 4.45508300  | 0.29400500  |
| C  | 0.48911400  | -2.89959300 | -1.17521400 |
| H  | 0.18620400  | -3.85871100 | -0.74301300 |
| H  | 0.25213500  | -2.93709600 | -2.24489500 |
| C  | 1.99822700  | -2.67741100 | -0.97834100 |
| H  | 2.21103100  | -2.62078300 | 0.09834800  |
| H  | 2.52786200  | -3.56000500 | -1.35237300 |
| C  | 2.52716300  | -1.42279300 | -1.67167900 |
| H  | 2.47682200  | -1.55317600 | -2.76092700 |
| H  | 1.87089100  | -0.56619400 | -1.44936500 |
| C  | 3.94588400  | -1.06057300 | -1.23977200 |
| H  | 3.99585500  | -1.07088900 | -0.14353100 |
| H  | 4.65011500  | -1.82153200 | -1.60264500 |
| C  | 4.37031400  | 0.32275600  | -1.72446000 |
| H  | 4.32287100  | 0.36412300  | -2.82064500 |
| H  | 3.64692700  | 1.05523900  | -1.34385300 |
| C  | 5.76729500  | 0.69791000  | -1.24081800 |
| H  | 6.06127300  | 1.68995000  | -1.59278200 |
| H  | 5.79802200  | 0.70510800  | -0.14715800 |
| H  | 6.51322300  | -0.02044700 | -1.59641600 |

TS15\_1

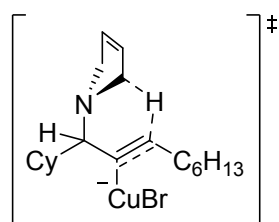

|    |             |             |             |
|----|-------------|-------------|-------------|
| C  | -2.03643600 | 0.04892200  | 0.47680300  |
| H  | -1.97098100 | 0.41443300  | 1.50772000  |
| C  | -0.83123800 | -0.82471900 | 0.13828300  |
| C  | -0.89281900 | -1.85011800 | -0.63320700 |
| N  | -3.22382300 | -0.79909800 | 0.41423700  |
| C  | -3.53060100 | -1.60409100 | 1.60311600  |
| H  | -2.60035800 | -1.93064600 | 2.09467500  |
| H  | -4.10699900 | -1.01156900 | 2.32274700  |
| C  | -3.42986000 | -1.57066700 | -0.70406100 |
| H  | -2.18164300 | -2.04950100 | -0.94360200 |
| H  | -3.58578000 | -1.06162800 | -1.65438800 |
| C  | -4.23649600 | -2.73896900 | -0.29032700 |
| C  | -4.28133100 | -2.77394400 | 1.04373500  |
| H  | -4.66326900 | -3.44970800 | -0.98491800 |
| H  | -4.76332200 | -3.52221300 | 1.65920700  |
| Cu | 0.96119100  | -0.21693600 | 0.91694600  |
| Br | 2.92431100  | 0.68560700  | 1.83393000  |
| C  | -2.14227800 | 1.27127800  | -0.45232000 |
| C  | -3.38003300 | 2.10242500  | -0.09179100 |
| C  | -0.87470600 | 2.13353600  | -0.39186500 |
| H  | -2.24775100 | 0.90258200  | -1.48534200 |
| C  | -3.50078300 | 3.35548000  | -0.96012000 |
| H  | -3.29742600 | 2.40377800  | 0.96332900  |
| H  | -4.28023000 | 1.48476600  | -0.17403900 |
| C  | -1.00548600 | 3.39899200  | -1.24389000 |
| H  | -0.68148000 | 2.41260000  | 0.65527900  |
| H  | -0.00564100 | 1.55658300  | -0.72739900 |
| C  | -2.24013600 | 4.21401200  | -0.86051800 |
| H  | -4.38488700 | 3.92950300  | -0.66481200 |
| H  | -3.65224200 | 3.05653800  | -2.00659700 |
| H  | -0.09710800 | 4.00049600  | -1.14443700 |
| H  | -1.08038600 | 3.11018900  | -2.30130200 |
| H  | -2.32628400 | 5.09859100  | -1.49960900 |
| H  | -2.12982300 | 4.57526200  | 0.17076800  |
| C  | -0.09546600 | -2.90084300 | -1.32882300 |
| H  | -0.41499200 | -3.88473600 | -0.96691500 |
| H  | -0.32987400 | -2.87165600 | -2.40085400 |

|   |            |             |             |
|---|------------|-------------|-------------|
| C | 1.41769500 | -2.72591300 | -1.12919500 |
| H | 1.62837500 | -2.67634000 | -0.05237600 |
| H | 1.91858700 | -3.62591800 | -1.50488200 |
| C | 1.99296300 | -1.49402300 | -1.82338500 |
| H | 1.88682700 | -1.60254100 | -2.91164200 |
| H | 1.39877500 | -0.61022100 | -1.55058600 |
| C | 3.45323000 | -1.23624800 | -1.45743400 |
| H | 3.56344900 | -1.27990100 | -0.36608500 |
| H | 4.08721400 | -2.03066400 | -1.87502600 |
| C | 3.94520400 | 0.12917200  | -1.92880400 |
| H | 3.85275200 | 0.20092400  | -3.02092000 |
| H | 3.28884900 | 0.89702900  | -1.49871300 |
| C | 5.38136600 | 0.40455000  | -1.49584300 |
| H | 5.72719600 | 1.37946000  | -1.84928200 |
| H | 5.44883100 | 0.39729200  | -0.40380800 |
| H | 6.06423300 | -0.35720400 | -1.88693200 |

**TS15\_2**

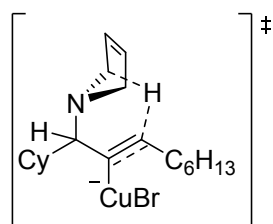

|    |             |             |             |
|----|-------------|-------------|-------------|
| C  | -2.09947300 | 0.83114300  | -0.63103800 |
| H  | -2.70175400 | 0.99250800  | -1.53622100 |
| C  | -0.62235500 | 1.04029300  | -1.02017500 |
| C  | -0.12603400 | 2.21425100  | -1.18783900 |
| N  | -2.41508900 | 1.91376800  | 0.29217000  |
| C  | -2.26369400 | 3.19692500  | -0.17934000 |
| H  | -1.08089100 | 3.09733700  | -0.86061400 |
| H  | -2.89999400 | 3.51041200  | -1.00575900 |
| C  | -1.82560700 | 1.84263700  | 1.63802800  |
| H  | -0.84429400 | 1.33925000  | 1.59045200  |
| H  | -2.46407800 | 1.26726900  | 2.31665600  |
| C  | -1.67707600 | 3.28142400  | 2.02352500  |
| C  | -1.95376600 | 4.06248100  | 0.97512300  |
| H  | -1.92249100 | 5.14252000  | 0.92896000  |
| H  | -1.38395000 | 3.60285800  | 3.01432400  |
| Cu | 0.65567300  | -0.52088200 | -0.65430300 |
| Br | 1.77878700  | -2.41822600 | 0.16625500  |
| C  | -2.43852800 | -0.55078000 | -0.06881300 |
| C  | -3.86268100 | -0.61934400 | 0.49738600  |
| C  | -2.28104700 | -1.63273000 | -1.14698700 |

|   |             |             |             |
|---|-------------|-------------|-------------|
| H | -1.72309700 | -0.77673000 | 0.74012000  |
| C | -4.14729900 | -2.00305600 | 1.08738500  |
| H | -4.57263000 | -0.41246500 | -0.31699600 |
| H | -4.02595100 | 0.15762300  | 1.25102900  |
| C | -2.54559600 | -3.02480500 | -0.57285700 |
| H | -2.99838100 | -1.42156500 | -1.95471900 |
| H | -1.28263500 | -1.60202000 | -1.59787200 |
| C | -3.94121200 | -3.10656900 | 0.04797000  |
| H | -5.16638700 | -2.03721200 | 1.48611500  |
| H | -3.46862100 | -2.17395100 | 1.93392600  |
| H | -2.43109800 | -3.77731000 | -1.35879700 |
| H | -1.78043000 | -3.24278500 | 0.18370800  |
| H | -4.10080500 | -4.08969200 | 0.50180500  |
| H | -4.69494200 | -2.99493400 | -0.74360500 |
| C | 1.09444800  | 2.97662800  | -1.57981200 |
| H | 1.20631700  | 3.84671800  | -0.92103800 |
| H | 0.95197300  | 3.36564400  | -2.59463100 |
| C | 2.36782100  | 2.11831300  | -1.51323200 |
| H | 3.17870700  | 2.66236400  | -2.01116400 |
| H | 2.20495000  | 1.19915100  | -2.09169000 |
| C | 2.79035900  | 1.76977100  | -0.08737500 |
| H | 3.07916400  | 2.68884500  | 0.44117100  |
| H | 1.93043500  | 1.36221000  | 0.46492900  |
| C | 3.92828200  | 0.75393000  | -0.03424100 |
| H | 3.65228600  | -0.12608900 | -0.63043000 |
| H | 4.83001800  | 1.18159100  | -0.49443900 |
| C | 4.23578400  | 0.28823800  | 1.38617300  |
| H | 4.54939000  | 1.14614300  | 1.99596700  |
| H | 3.31036200  | -0.10321900 | 1.82683800  |
| C | 5.29843500  | -0.80484700 | 1.41536800  |
| H | 6.23029000  | -0.46290900 | 0.95225600  |
| H | 5.52532400  | -1.11607300 | 2.43842900  |
| H | 4.94221900  | -1.68182700 | 0.86647300  |

**Int31\_1**

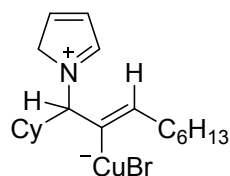

|   |             |             |             |
|---|-------------|-------------|-------------|
| C | -1.88633400 | 0.00767100  | 0.40936400  |
| H | -1.73886200 | 0.33220800  | 1.44683600  |
| C | -0.77956200 | -0.97165700 | 0.00541200  |
| C | -1.05633100 | -1.96921300 | -0.83778900 |

|    |             |             |             |
|----|-------------|-------------|-------------|
| N  | -3.18405500 | -0.71206600 | 0.43854800  |
| C  | -3.47111600 | -1.62503400 | 1.54097200  |
| H  | -2.56844200 | -2.22512900 | 1.71957400  |
| H  | -3.69677500 | -1.05418600 | 2.44932200  |
| C  | -3.96789400 | -0.97952000 | -0.56441300 |
| H  | -2.08763300 | -2.14119300 | -1.20424800 |
| H  | -3.89489500 | -0.43185600 | -1.49618800 |
| C  | -4.90011800 | -2.03813900 | -0.22272100 |
| C  | -4.61678600 | -2.43021600 | 1.03298700  |
| H  | -5.66678700 | -2.41540500 | -0.88388100 |
| H  | -5.11443200 | -3.19732100 | 1.61069500  |
| Cu | 0.97741400  | -0.40952900 | 0.86009100  |
| Br | 2.82852800  | 0.60601700  | 1.92517600  |
| C  | -1.97195300 | 1.26405500  | -0.47409100 |
| C  | -3.06940400 | 2.22259900  | 0.01437200  |
| C  | -0.61741800 | 1.98884400  | -0.52108200 |
| H  | -2.19590000 | 0.94010900  | -1.50377400 |
| C  | -3.13584100 | 3.49968400  | -0.82519500 |
| H  | -2.84675100 | 2.49052000  | 1.05755500  |
| H  | -4.04899800 | 1.72933800  | 0.02104300  |
| C  | -0.69164900 | 3.27394800  | -1.34745800 |
| H  | -0.29814500 | 2.22359500  | 0.50526100  |
| H  | 0.14398400  | 1.32423100  | -0.93815700 |
| C  | -1.78464500 | 4.21335900  | -0.84027200 |
| H  | -3.91943200 | 4.15850600  | -0.43731900 |
| H  | -3.41931600 | 3.24126900  | -1.85499500 |
| H  | 0.28307200  | 3.77013200  | -1.33034100 |
| H  | -0.89779500 | 3.01493700  | -2.39524000 |
| H  | -1.83485200 | 5.11450600  | -1.45949000 |
| H  | -1.53758800 | 4.53885000  | 0.17898700  |
| C  | -0.10619900 | -2.99405700 | -1.42110900 |
| H  | -0.41408800 | -3.98480800 | -1.05785800 |
| H  | -0.27036300 | -3.02534600 | -2.50840100 |
| C  | 1.38182800  | -2.78740800 | -1.14958700 |
| H  | 1.92829500  | -3.69047800 | -1.44811100 |
| H  | 1.54255000  | -2.68090400 | -0.06760500 |
| C  | 1.97329100  | -1.57922600 | -1.87526700 |
| H  | 1.93647900  | -1.75057000 | -2.96017400 |
| H  | 1.33637700  | -0.70439400 | -1.68845800 |
| C  | 3.40251700  | -1.25636500 | -1.44155700 |
| H  | 3.46951800  | -1.30364800 | -0.34647900 |
| H  | 4.09292900  | -2.01653000 | -1.83265600 |
| C  | 3.85188900  | 0.13467100  | -1.87918500 |
| H  | 3.79144200  | 0.21879400  | -2.97291500 |

|   |            |             |             |
|---|------------|-------------|-------------|
| H | 3.14771800 | 0.86648900  | -1.46103100 |
| C | 5.25850300 | 0.46839600  | -1.39375400 |
| H | 5.57237900 | 1.46302100  | -1.72215000 |
| H | 5.28704600 | 0.44793900  | -0.30008400 |
| H | 5.98750200 | -0.25682200 | -1.77112300 |

**Int31\_2**

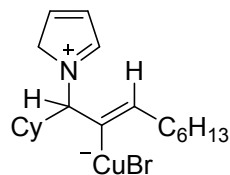

|    |             |             |             |
|----|-------------|-------------|-------------|
| C  | -1.92656900 | -0.08028400 | 0.47873100  |
| H  | -1.93270600 | 0.27263300  | 1.51973700  |
| C  | -0.74204100 | -1.00914200 | 0.29110500  |
| C  | -0.92188800 | -2.30003300 | -0.01601900 |
| N  | -3.23058000 | -0.81671800 | 0.34322500  |
| C  | -3.84194900 | -1.12545000 | -0.94563600 |
| H  | -4.23515900 | -0.21486800 | -1.41052300 |
| H  | -3.05946800 | -1.53733800 | -1.59791800 |
| C  | -3.77088100 | -1.55237900 | 1.26331900  |
| H  | -1.92807400 | -2.73607000 | -0.14087800 |
| H  | -3.40299400 | -1.51591600 | 2.28328900  |
| C  | -4.83959000 | -2.37052500 | 0.72320600  |
| C  | -4.89370100 | -2.12079100 | -0.59833900 |
| H  | -5.45325000 | -3.04299000 | 1.30481700  |
| H  | -5.56960200 | -2.55359100 | -1.32356200 |
| Cu | 1.00998500  | -0.11535800 | 0.83498800  |
| Br | 2.86919200  | 1.21170800  | 1.47208500  |
| C  | -2.00906900 | 1.16443400  | -0.43465900 |
| C  | -3.16283000 | 2.07625700  | 0.01573300  |
| C  | -0.70081100 | 1.96350500  | -0.48402300 |
| H  | -2.20168700 | 0.81852500  | -1.46354300 |
| C  | -3.29702000 | 3.32526400  | -0.85612100 |
| H  | -2.96223800 | 2.38449600  | 1.05235200  |
| H  | -4.11570700 | 1.53069600  | 0.03891100  |
| C  | -0.83880700 | 3.22779900  | -1.33681800 |
| H  | -0.39422700 | 2.23544300  | 0.53642800  |
| H  | 0.09940200  | 1.34196600  | -0.89427800 |
| C  | -1.98947900 | 4.11563700  | -0.86817200 |
| H  | -4.12477100 | 3.94440100  | -0.49537200 |
| H  | -3.54853900 | 3.02566200  | -1.88351800 |
| H  | 0.10759200  | 3.77544900  | -1.31552300 |
| H  | -1.01456700 | 2.93729800  | -2.38220700 |



|   |             |             |             |
|---|-------------|-------------|-------------|
| H | -2.08064000 | 4.99774500  | -1.50981300 |
| H | -1.77882100 | 4.47840600  | 0.14659500  |
| C | 0.12593200  | -3.37936900 | -0.19751300 |
| H | -0.07576900 | -4.16311800 | 0.54673200  |
| H | -0.05020100 | -3.86127500 | -1.17125200 |
| C | 1.59391600  | -2.97233000 | -0.10948200 |
| H | 2.20792500  | -3.88036500 | -0.05881900 |
| H | 1.77148900  | -2.44233900 | 0.83736100  |
| C | 2.08084100  | -2.11418500 | -1.27737100 |
| H | 1.99634200  | -2.68799300 | -2.21120600 |
| H | 1.41490100  | -1.24923300 | -1.39522100 |
| C | 3.51521100  | -1.62246100 | -1.08799800 |
| H | 3.63601700  | -1.25058500 | -0.06220800 |
| H | 4.21499000  | -2.46176900 | -1.20525200 |
| C | 3.88866300  | -0.49254000 | -2.04294800 |
| H | 3.77439900  | -0.82889000 | -3.08258700 |
| H | 3.17666800  | 0.32977100  | -1.89186700 |
| C | 5.30336900  | 0.02359100  | -1.80182600 |
| H | 5.56302600  | 0.82851300  | -2.49502300 |
| H | 5.38809500  | 0.41314000  | -0.78283400 |
| H | 6.04054300  | -0.77719200 | -1.92402900 |

**Int32**

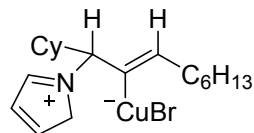

|    |             |             |             |
|----|-------------|-------------|-------------|
| C  | -1.75239200 | 0.54644400  | 1.03842700  |
| H  | -2.32936900 | 1.08102400  | 1.81232600  |
| C  | -0.52022300 | 1.32317200  | 0.57648600  |
| C  | -0.38469600 | 2.55240500  | 1.09427500  |
| N  | -1.22994500 | -0.66855800 | 1.72670500  |
| C  | -0.60536900 | -0.55325100 | 3.03817700  |
| H  | 0.07575400  | 0.30855700  | 3.00071500  |
| H  | -1.36494700 | -0.36655100 | 3.80535400  |
| C  | -0.87269000 | -1.78637200 | 1.16698900  |
| H  | -1.13492500 | 2.93581300  | 1.80250600  |
| H  | -1.15604700 | -2.04182600 | 0.15293000  |
| C  | -0.05218800 | -2.57640200 | 2.06634800  |
| C  | 0.10820100  | -1.85327800 | 3.18884600  |
| H  | 0.36283200  | -3.54037000 | 1.81156800  |
| H  | 0.66706500  | -2.12787000 | 4.07340700  |
| Cu | 0.68132900  | 0.13217900  | -0.53975700 |
| Br | 1.51369500  | -2.02614600 | -1.20018700 |

|   |             |             |             |
|---|-------------|-------------|-------------|
| C | -2.69953900 | 0.16667200  | -0.10531500 |
| C | -3.89911400 | -0.67842500 | 0.34601100  |
| C | -3.18808800 | 1.44556500  | -0.79792200 |
| H | -2.11834800 | -0.39695300 | -0.85372600 |
| C | -4.82429900 | -1.00498500 | -0.82918900 |
| H | -4.45995000 | -0.11144100 | 1.10361900  |
| H | -3.57331300 | -1.60662100 | 0.83055800  |
| C | -4.11672300 | 1.12490200  | -1.96908400 |
| H | -3.72349000 | 2.06199500  | -0.05956300 |
| H | -2.32685700 | 2.02883500  | -1.13340400 |
| C | -5.30371100 | 0.26920500  | -1.52565000 |
| H | -5.67623200 | -1.59790400 | -0.48110900 |
| H | -4.27803300 | -1.62736500 | -1.55102900 |
| H | -4.46631900 | 2.05344700  | -2.43136000 |
| H | -3.54803800 | 0.58386700  | -2.73734600 |
| H | -5.93767500 | 0.01796500  | -2.38192400 |
| H | -5.92428300 | 0.84780500  | -0.82771800 |
| C | 0.69645700  | 3.56370000  | 0.78289100  |
| H | 0.20734300  | 4.45347900  | 0.36293100  |
| H | 1.14474400  | 3.90456800  | 1.72841300  |
| C | 1.80115100  | 3.09671200  | -0.16257800 |
| H | 1.33596400  | 2.62704400  | -1.04012100 |
| H | 2.35283300  | 3.96688300  | -0.53802400 |
| C | 2.78844800  | 2.11856600  | 0.47948200  |
| H | 2.23368700  | 1.38360800  | 1.07908700  |
| H | 3.43225300  | 2.66031700  | 1.18576500  |
| C | 3.64991000  | 1.37838400  | -0.54188000 |
| H | 3.00242200  | 0.94291000  | -1.31938100 |
| H | 4.30467200  | 2.09164200  | -1.06184100 |
| C | 4.48121300  | 0.25365700  | 0.06834200  |
| H | 3.80208500  | -0.43540900 | 0.58776400  |
| H | 5.16074200  | 0.66836300  | 0.82487200  |
| C | 5.26493500  | -0.52488600 | -0.98313300 |
| H | 5.87211700  | -1.31243700 | -0.52891300 |
| H | 4.57375400  | -0.99783100 | -1.68747200 |
| H | 5.93360200  | 0.13558200  | -1.54545900 |

**TS16**

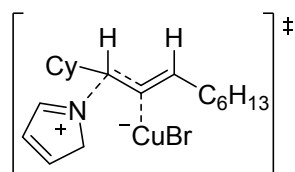

|   |             |            |            |
|---|-------------|------------|------------|
| C | -1.72332200 | 0.79255900 | 1.13920400 |
|---|-------------|------------|------------|

|    |             |             |             |
|----|-------------|-------------|-------------|
| H  | -2.03964800 | 0.89983600  | 2.18048700  |
| C  | -0.66595400 | 1.55064400  | 0.63951900  |
| C  | -0.49151800 | 2.87855000  | 0.74512000  |
| N  | -0.73655300 | -1.01551100 | 1.84798600  |
| C  | 0.34612300  | -0.77633100 | 2.78940400  |
| H  | 0.79022100  | 0.20640100  | 2.57377600  |
| H  | -0.04964800 | -0.73968600 | 3.81204300  |
| C  | -0.44098400 | -2.07469900 | 1.17567500  |
| H  | -1.29384100 | 3.48709800  | 1.17898700  |
| H  | -1.07783100 | -2.43627400 | 0.37126200  |
| C  | 0.82914700  | -2.67740600 | 1.58836500  |
| C  | 1.31244200  | -1.89821500 | 2.56958500  |
| H  | 1.27440900  | -3.55249700 | 1.13676600  |
| H  | 2.24179400  | -2.01922600 | 3.11103100  |
| Cu | 0.44313500  | 0.28592600  | -0.57586300 |
| Br | 1.27138900  | -1.57288500 | -1.80092000 |
| C  | -2.73419800 | 0.15048300  | 0.22470800  |
| C  | -3.74010000 | -0.74844400 | 0.94890300  |
| C  | -3.47118600 | 1.28450700  | -0.52251600 |
| H  | -2.19450600 | -0.43899400 | -0.53153200 |
| C  | -4.77408100 | -1.31725800 | -0.02507100 |
| H  | -4.25543800 | -0.15024100 | 1.71486400  |
| H  | -3.21541600 | -1.55113400 | 1.47563500  |
| C  | -4.50758100 | 0.71319400  | -1.49115800 |
| H  | -3.97087300 | 1.93002700  | 0.21481400  |
| H  | -2.74350700 | 1.90466200  | -1.05385200 |
| C  | -5.50236100 | -0.19934500 | -0.77370400 |
| H  | -5.48827300 | -1.94729400 | 0.51449100  |
| H  | -4.26423700 | -1.96559500 | -0.75096900 |
| H  | -5.03102600 | 1.53185400  | -1.99508700 |
| H  | -3.98587400 | 0.14150100  | -2.27013400 |
| H  | -6.21668200 | -0.62068100 | -1.48793200 |
| H  | -6.08326500 | 0.39503700  | -0.05495900 |
| C  | 0.66381300  | 3.71587200  | 0.25682800  |
| H  | 0.25482300  | 4.48305600  | -0.41435900 |
| H  | 1.05124800  | 4.27554400  | 1.12201400  |
| C  | 1.81222600  | 2.99131900  | -0.43731700 |
| H  | 1.40728400  | 2.39143400  | -1.26751100 |
| H  | 2.47139900  | 3.73095400  | -0.90696400 |
| C  | 2.64062400  | 2.09767500  | 0.48752200  |
| H  | 3.17043200  | 2.72113100  | 1.22017200  |
| H  | 1.96209100  | 1.46423700  | 1.07524000  |
| C  | 3.62869900  | 1.20320700  | -0.26317000 |
| H  | 4.49376200  | 1.79426900  | -0.59213600 |

|   |            |             |             |
|---|------------|-------------|-------------|
| H | 3.15327800 | 0.81467000  | -1.17430800 |
| C | 4.09241500 | 0.00886200  | 0.56681000  |
| H | 3.20212600 | -0.56579400 | 0.86102700  |
| H | 4.56785500 | 0.36083500  | 1.49275500  |
| C | 5.03556600 | -0.90545100 | -0.20726500 |
| H | 5.93043700 | -0.36431900 | -0.53172800 |
| H | 5.35850700 | -1.75633600 | 0.39887200  |
| H | 4.52811900 | -1.29511600 | -1.09510000 |

**TS17**

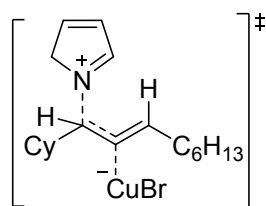

|    |             |             |             |
|----|-------------|-------------|-------------|
| C  | 1.66344900  | 0.13250600  | -0.45746700 |
| H  | 1.70846900  | 0.33778800  | -1.53103100 |
| C  | 0.88896300  | -0.97489900 | -0.06777300 |
| C  | 1.17930100  | -2.08826400 | 0.60016400  |
| N  | 3.52548800  | -0.43051600 | -0.40987800 |
| C  | 3.88637500  | -1.43061700 | -1.40336100 |
| H  | 2.99386100  | -2.02968300 | -1.62975900 |
| H  | 4.20427100  | -0.93966900 | -2.33120300 |
| C  | 4.23188300  | -0.64816200 | 0.64663500  |
| H  | 2.23421300  | -2.28265800 | 0.84578700  |
| H  | 4.10799100  | -0.04236100 | 1.54081100  |
| C  | 5.16853000  | -1.75982800 | 0.47674700  |
| C  | 4.96704300  | -2.23910600 | -0.76248500 |
| H  | 5.86871300  | -2.10745800 | 1.22362900  |
| H  | 5.47583700  | -3.06527800 | -1.24152700 |
| Cu | -0.93989500 | -0.39448500 | -0.86524700 |
| Br | -2.85427500 | 0.52566500  | -1.88950600 |
| C  | 1.70647000  | 1.38506200  | 0.40842900  |
| C  | 2.60249400  | 2.47138300  | -0.19957000 |
| C  | 0.29408500  | 1.95062100  | 0.66295700  |
| H  | 2.10531400  | 1.07950500  | 1.38917500  |
| C  | 2.64522900  | 3.72727300  | 0.67310700  |
| H  | 2.19821800  | 2.73384500  | -1.18802000 |
| H  | 3.61249300  | 2.08290800  | -0.36230200 |
| C  | 0.34117000  | 3.21103600  | 1.52812900  |
| H  | -0.18591200 | 2.17979100  | -0.29953500 |
| H  | -0.32195300 | 1.18658500  | 1.14876200  |
| C  | 1.24079800  | 4.28155300  | 0.91223200  |

|   |             |             |             |
|---|-------------|-------------|-------------|
| H | 3.28495100  | 4.48234100  | 0.20516200  |
| H | 3.10505000  | 3.47898500  | 1.64015200  |
| H | -0.67510000 | 3.59211200  | 1.66544000  |
| H | 0.72146000  | 2.94873300  | 2.52511700  |
| H | 1.28207600  | 5.16489200  | 1.55726800  |
| H | 0.81285800  | 4.60508500  | -0.04586200 |
| C | 0.25117700  | -3.18274500 | 1.06862700  |
| H | 0.54520300  | -4.11365100 | 0.56469000  |
| H | 0.45258900  | -3.35809100 | 2.13535400  |
| C | -1.24340000 | -2.94370400 | 0.87303600  |
| H | -1.44119000 | -2.72173900 | -0.18676900 |
| H | -1.78476500 | -3.87373400 | 1.08393100  |
| C | -1.81210100 | -1.82452300 | 1.74618800  |
| H | -1.71902000 | -2.10416300 | 2.80454000  |
| H | -1.19533700 | -0.92325800 | 1.62479800  |
| C | -3.26500400 | -1.48575200 | 1.41253700  |
| H | -3.92820600 | -2.27730500 | 1.78725900  |
| H | -3.39122700 | -1.46098100 | 0.32213500  |
| C | -3.70170000 | -0.13149300 | 1.96491000  |
| H | -3.01937700 | 0.63449600  | 1.57078500  |
| H | -3.59561600 | -0.12189400 | 3.05808700  |
| C | -5.12872700 | 0.22259300  | 1.56061900  |
| H | -5.83732700 | -0.53284100 | 1.91652300  |
| H | -5.43486100 | 1.18969400  | 1.96851200  |
| H | -5.20172300 | 0.27581200  | 0.47012700  |

### Int33

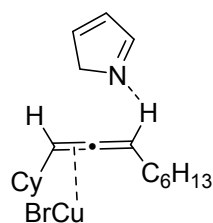

|   |            |             |             |
|---|------------|-------------|-------------|
| C | 0.75210100 | 0.39906200  | -1.53366600 |
| H | 0.59041800 | 0.93825000  | -2.47236500 |
| C | 0.60743100 | -0.92527300 | -1.52035400 |
| C | 0.72747800 | -2.22992800 | -1.49757100 |
| N | 3.71039200 | -1.94227800 | -0.42839100 |
| C | 5.07356600 | -1.43834200 | -0.33550500 |
| H | 5.77792700 | -2.26189900 | -0.50923900 |
| H | 5.24994400 | -0.70680500 | -1.13526900 |
| C | 3.16052100 | -1.69461200 | 0.70747300  |
| H | 1.73368500 | -2.57311800 | -1.75059600 |
| H | 2.12442200 | -1.96971000 | 0.90074700  |

|    |             |             |             |
|----|-------------|-------------|-------------|
| C  | 4.04364100  | -1.01161700 | 1.66446400  |
| C  | 5.21599300  | -0.84360200 | 1.03208100  |
| H  | 3.77690600  | -0.71449600 | 2.67039600  |
| H  | 6.11522500  | -0.37840200 | 1.41544200  |
| Cu | -1.39711800 | 0.13555600  | -1.11142000 |
| Br | -3.51742500 | 1.05330800  | -0.70025500 |
| C  | 1.31837800  | 1.20608900  | -0.37847900 |
| C  | 2.78056700  | 1.56707500  | -0.69319200 |
| C  | 0.49648500  | 2.47453000  | -0.10416000 |
| H  | 1.30810000  | 0.57304000  | 0.52143700  |
| C  | 3.39822400  | 2.41515100  | 0.42014700  |
| H  | 2.80719500  | 2.12940000  | -1.63790800 |
| H  | 3.34944500  | 0.64450300  | -0.84928500 |
| C  | 1.12718400  | 3.32644500  | 0.99906100  |
| H  | 0.43802800  | 3.06039200  | -1.03330800 |
| H  | -0.53555300 | 2.21712400  | 0.16613200  |
| C  | 2.57826500  | 3.68069000  | 0.67035700  |
| H  | 4.43365500  | 2.66550700  | 0.16511400  |
| H  | 3.43660900  | 1.81937900  | 1.34177400  |
| H  | 0.53235100  | 4.23208800  | 1.15078600  |
| H  | 1.09706100  | 2.76617400  | 1.94361900  |
| H  | 3.02091200  | 4.26727500  | 1.48171300  |
| H  | 2.60119300  | 4.31154000  | -0.22849400 |
| C  | -0.27586000 | -3.29620500 | -1.13539500 |
| H  | -0.54030500 | -3.83623300 | -2.05295700 |
| H  | 0.25078700  | -4.02591900 | -0.50670300 |
| C  | -1.53944300 | -2.83265700 | -0.41578800 |
| H  | -2.18567600 | -3.70366500 | -0.25591500 |
| H  | -2.12526700 | -2.16210600 | -1.06463700 |
| C  | -1.28237400 | -2.15953600 | 0.93374200  |
| H  | -0.67782200 | -2.82696500 | 1.56399400  |
| H  | -0.66369600 | -1.25810400 | 0.79693400  |
| C  | -2.57354900 | -1.77128100 | 1.65500500  |
| H  | -3.03383800 | -2.66757700 | 2.09152300  |
| H  | -3.28853900 | -1.37082200 | 0.92580500  |
| C  | -2.35389100 | -0.71543000 | 2.73506500  |
| H  | -1.89146600 | 0.16434600  | 2.26573100  |
| H  | -1.64080600 | -1.08882400 | 3.48221600  |
| C  | -3.65842500 | -0.29637500 | 3.40401400  |
| H  | -4.15126400 | -1.15329000 | 3.87466100  |
| H  | -3.49167000 | 0.46085800  | 4.17441000  |
| H  | -4.34218500 | 0.12200400  | 2.65928100  |

8

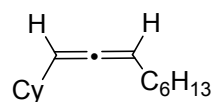

|   |             |             |             |
|---|-------------|-------------|-------------|
| C | -0.40091600 | -1.91376700 | 0.74530100  |
| H | -0.66673400 | -2.19851600 | 1.76511500  |
| C | 0.69478900  | -2.38879900 | 0.21114300  |
| C | 1.79869300  | -2.80427700 | -0.35459400 |
| H | 1.77416300  | -3.73180900 | -0.92559700 |
| C | -1.33844300 | -0.95786000 | 0.04488800  |
| C | -2.74779300 | -1.55321800 | -0.08783300 |
| C | -1.39924700 | 0.38323600  | 0.79179700  |
| H | -0.94684100 | -0.77237000 | -0.96580600 |
| C | -3.71019000 | -0.57316500 | -0.76301400 |
| H | -3.12110000 | -1.79726100 | 0.91772000  |
| H | -2.69840800 | -2.49485500 | -0.64462400 |
| C | -2.35865000 | 1.36400000  | 0.11485700  |
| H | -1.73593500 | 0.19557300  | 1.82215400  |
| H | -0.39168100 | 0.80937300  | 0.86211100  |
| C | -3.75931100 | 0.76168600  | -0.01672600 |
| H | -4.71112500 | -1.01230700 | -0.82914700 |
| H | -3.37419000 | -0.39504000 | -1.79381400 |
| H | -2.39336200 | 2.30527500  | 0.67401400  |
| H | -1.97719400 | 1.60565000  | -0.88736400 |
| H | -4.42943600 | 1.46052200  | -0.52825800 |
| H | -4.17583500 | 0.59831900  | 0.98669000  |
| C | 3.13231500  | -2.09171800 | -0.26423400 |
| H | 3.55041800  | -2.00952500 | -1.27638500 |
| H | 3.82700200  | -2.73150400 | 0.29489000  |
| C | 3.06680500  | -0.70704700 | 0.37901800  |
| H | 2.55987300  | -0.78706100 | 1.34939400  |
| H | 4.08601100  | -0.35829300 | 0.58473500  |
| C | 2.34434400  | 0.33048000  | -0.47910600 |
| H | 2.88106500  | 0.45774300  | -1.42949000 |
| H | 1.34531000  | -0.04233400 | -0.73772200 |
| C | 2.20157500  | 1.68267600  | 0.21338100  |
| H | 3.19456000  | 2.10259700  | 0.42540500  |
| H | 1.72113600  | 1.53642500  | 1.19158800  |
| C | 1.38616000  | 2.68394100  | -0.60187800 |
| H | 1.90830200  | 2.89498400  | -1.54342100 |
| H | 0.42995600  | 2.22058800  | -0.88108300 |
| C | 1.12061800  | 3.98323800  | 0.15224800  |
| H | 0.54973400  | 4.69222400  | -0.45294400 |
| H | 0.55139800  | 3.78796000  | 1.06726700  |

H 2.05841600 4.46720300 0.44308300

**TS18**

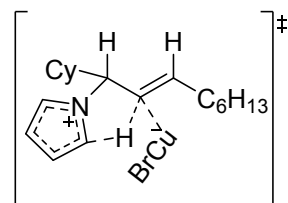

|    |             |             |             |
|----|-------------|-------------|-------------|
| C  | -2.06261400 | 0.44754500  | 0.99319400  |
| H  | -2.68155200 | 0.89983800  | 1.78258600  |
| C  | -0.75178900 | -0.12691700 | 1.55889800  |
| C  | -0.11694700 | 0.44780000  | 2.58895900  |
| N  | -2.77391100 | -0.77887000 | 0.55061600  |
| C  | -2.71146100 | -1.83991200 | 1.50198600  |
| H  | -1.45598800 | -1.59335700 | 1.70142300  |
| H  | -3.19215200 | -1.68029900 | 2.46342000  |
| C  | -2.61254200 | -1.32168500 | -0.65940300 |
| H  | -0.49267100 | 1.38253300  | 3.02385100  |
| H  | -2.40613700 | -0.71538300 | -1.53116900 |
| C  | -2.70284600 | -2.72969100 | -0.58972100 |
| C  | -2.81206000 | -3.05194100 | 0.74289500  |
| H  | -2.63908000 | -3.39782000 | -1.43528000 |
| H  | -2.90483200 | -4.04110100 | 1.17013600  |
| Cu | 0.27729300  | -1.24522500 | 0.16360700  |
| Br | 1.25240900  | -2.29042500 | -1.71139700 |
| C  | -1.88640500 | 1.46952900  | -0.13410100 |
| C  | -3.23318100 | 1.91585100  | -0.72523000 |
| C  | -1.11062800 | 2.69902600  | 0.35792400  |
| H  | -1.27615800 | 1.00449700  | -0.92550400 |
| C  | -3.04111400 | 2.92925500  | -1.85571900 |
| H  | -3.82446400 | 2.37601500  | 0.07995300  |
| H  | -3.81526200 | 1.05908200  | -1.08138800 |
| C  | -0.91349200 | 3.71665900  | -0.76716300 |
| H  | -1.66919200 | 3.16656200  | 1.18326000  |
| H  | -0.14096400 | 2.39368300  | 0.76079500  |
| C  | -2.24782300 | 4.14556400  | -1.37713100 |
| H  | -4.01464900 | 3.23595800  | -2.25111000 |
| H  | -2.50087000 | 2.44682300  | -2.68162400 |
| H  | -0.36807100 | 4.58642800  | -0.38772000 |
| H  | -0.28517600 | 3.26522600  | -1.54683600 |
| H  | -2.08431800 | 4.84425300  | -2.20353800 |
| H  | -2.83489400 | 4.68076000  | -0.61825000 |
| C  | 1.17149300  | -0.06200100 | 3.17002900  |
| H  | 1.12829300  | -0.01850700 | 4.26448300  |



|   |            |             |             |
|---|------------|-------------|-------------|
| H | 1.30453100 | -1.11404500 | 2.88459400  |
| C | 2.38832200 | 0.74500600  | 2.67693300  |
| H | 2.24152300 | 1.80832900  | 2.91071600  |
| H | 3.27310200 | 0.42276700  | 3.23918800  |
| C | 2.65424100 | 0.57847500  | 1.18342500  |
| H | 2.73699900 | -0.49292900 | 0.94333400  |
| H | 1.79497000 | 0.95045500  | 0.60760500  |
| C | 3.91274900 | 1.28980600  | 0.69563900  |
| H | 4.79021300 | 0.88213900  | 1.21624800  |
| H | 3.86257800 | 2.35444700  | 0.96540600  |
| C | 4.10555900 | 1.15352000  | -0.81342900 |
| H | 4.10530300 | 0.09053300  | -1.08232000 |
| H | 3.23817700 | 1.59101000  | -1.32427700 |
| C | 5.38641500 | 1.82070500  | -1.30523800 |
| H | 5.50224900 | 1.71702400  | -2.38704500 |
| H | 5.38885500 | 2.88960500  | -1.06727000 |
| H | 6.26595100 | 1.37442200  | -0.83018900 |

**Int34**

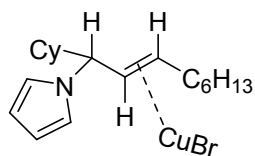

|    |             |             |             |
|----|-------------|-------------|-------------|
| C  | 2.01695100  | 0.40898200  | 0.10457500  |
| H  | 1.70773600  | 0.15502900  | 1.12836900  |
| C  | 0.88764900  | 1.16907100  | -0.58009400 |
| C  | 0.10832100  | 2.07233900  | 0.05992900  |
| N  | 3.16350900  | 1.29634400  | 0.25036200  |
| C  | 3.70392400  | 1.70090800  | 1.44315500  |
| H  | 3.28048700  | 1.36321500  | 2.37823800  |
| C  | 3.88646600  | 1.84290100  | -0.77996300 |
| H  | 0.24100400  | 2.18883400  | 1.14039500  |
| H  | 3.62184900  | 1.64922800  | -1.80934700 |
| C  | 4.89647800  | 2.60208100  | -0.23766200 |
| C  | 4.78164400  | 2.51119700  | 1.17514900  |
| H  | 5.63511100  | 3.15894600  | -0.79481400 |
| H  | 5.41835300  | 2.97894800  | 1.91100100  |
| Cu | -0.90494500 | 0.04381300  | 0.24413100  |
| Br | -2.32525900 | -1.49472700 | 1.29901600  |
| H  | 0.83826800  | 1.10608000  | -1.66961400 |
| C  | 2.40693500  | -0.89280900 | -0.61390200 |
| C  | 3.56651900  | -1.57873900 | 0.11769900  |
| C  | 1.21196800  | -1.84465900 | -0.74478900 |
| H  | 2.74835500  | -0.62689000 | -1.62763700 |

|   |             |             |             |
|---|-------------|-------------|-------------|
| C | 3.95444400  | -2.90033100 | -0.54675000 |
| H | 3.25586500  | -1.77311700 | 1.15557000  |
| H | 4.42684500  | -0.90328200 | 0.16310100  |
| C | 1.60517600  | -3.17114000 | -1.40083600 |
| H | 0.79605200  | -2.04730500 | 0.25466800  |
| H | 0.40762100  | -1.38267800 | -1.33680700 |
| C | 2.75418200  | -3.84179700 | -0.64841400 |
| H | 4.76844600  | -3.37183100 | 0.01246500  |
| H | 4.34059100  | -2.69607000 | -1.55483200 |
| H | 0.73206300  | -3.82878900 | -1.44210100 |
| H | 1.91428900  | -2.98059500 | -2.43759500 |
| H | 3.03847500  | -4.77430400 | -1.14598400 |
| H | 2.41579100  | -4.10907700 | 0.36150500  |
| C | -0.82873100 | 3.05000900  | -0.59606300 |
| H | -0.49429900 | 4.05129500  | -0.30118400 |
| H | -0.72788900 | 2.98635200  | -1.68584900 |
| C | -2.30026200 | 2.84431200  | -0.19038600 |
| H | -2.34489300 | 2.53831600  | 0.86445000  |
| H | -2.83763100 | 3.79561000  | -0.25547500 |
| C | -3.01432500 | 1.80425800  | -1.05611100 |
| H | -3.22354200 | 2.23673200  | -2.04348600 |
| H | -2.34579500 | 0.94907300  | -1.26261600 |
| C | -4.29474500 | 1.26850600  | -0.42405700 |
| H | -4.06328900 | 0.89989300  | 0.58350400  |
| H | -5.01755800 | 2.08800700  | -0.30895100 |
| C | -4.91945100 | 0.12725400  | -1.22125800 |
| H | -5.18344000 | 0.47853800  | -2.22743600 |
| H | -4.16648900 | -0.66188900 | -1.34161900 |
| C | -6.14510400 | -0.45396900 | -0.52417500 |
| H | -6.91118500 | 0.31273700  | -0.36844600 |
| H | -6.59241000 | -1.26316400 | -1.10687900 |
| H | -5.86410900 | -0.85763000 | 0.45324800  |

7

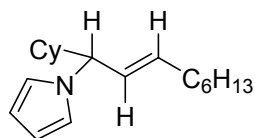

|   |             |             |             |
|---|-------------|-------------|-------------|
| C | -1.44085800 | -0.46985500 | 0.31148900  |
| H | -1.28300700 | -0.45610600 | 1.39779900  |
| C | -0.40574400 | -1.36752200 | -0.31207300 |
| C | 0.49781300  | -2.05840000 | 0.37787700  |
| N | -2.78661100 | -1.00492300 | 0.10930600  |
| C | -3.68363500 | -1.28254000 | 1.10466400  |

|   |             |             |             |
|---|-------------|-------------|-------------|
| H | -3.39396700 | -1.18968700 | 2.14125300  |
| C | -3.39619000 | -1.18589100 | -1.10432200 |
| H | 0.49950800  | -1.98037900 | 1.46787900  |
| H | -2.86101200 | -1.01289800 | -2.02653100 |
| C | -4.69186200 | -1.59174000 | -0.88025200 |
| C | -4.87542000 | -1.65318300 | 0.52606900  |
| H | -5.42096300 | -1.82310800 | -1.64275400 |
| H | -5.77246100 | -1.93958600 | 1.05458300  |
| H | -0.41418400 | -1.43041200 | -1.40185500 |
| C | -1.35385700 | 0.97882200  | -0.20554300 |
| C | -2.46258300 | 1.84987200  | 0.39472900  |
| C | 0.02695100  | 1.58301200  | 0.07500300  |
| H | -1.49651000 | 0.95025800  | -1.29827300 |
| C | -2.36558600 | 3.29767400  | -0.08814900 |
| H | -2.37013400 | 1.82633600  | 1.49168300  |
| H | -3.44293700 | 1.42805200  | 0.14957900  |
| C | 0.11767200  | 3.03425700  | -0.40093800 |
| H | 0.21419200  | 1.54194200  | 1.15941200  |
| H | 0.80613300  | 0.97772100  | -0.40042400 |
| C | -0.98926700 | 3.89368500  | 0.21140300  |
| H | -3.15427900 | 3.89998100  | 0.37420000  |
| H | -2.54124200 | 3.32585500  | -1.17227500 |
| H | 1.10362100  | 3.44550500  | -0.16002700 |
| H | 0.02494800  | 3.05683900  | -1.49543400 |
| H | -0.92581100 | 4.92062300  | -0.16325800 |
| H | -0.84682400 | 3.94225800  | 1.29975700  |
| C | 1.55496000  | -2.93607700 | -0.22516300 |
| H | 1.38093300  | -3.97655700 | 0.07669700  |
| H | 1.47267000  | -2.90253200 | -1.31817600 |
| C | 2.96979300  | -2.52114600 | 0.19955100  |
| H | 3.07957100  | -2.65616600 | 1.28400500  |
| H | 3.69577500  | -3.19605900 | -0.27001400 |
| C | 3.30423200  | -1.07557500 | -0.16221900 |
| H | 3.08449100  | -0.90552200 | -1.22641600 |
| H | 2.64182100  | -0.39983000 | 0.39488300  |
| C | 4.75664000  | -0.70661400 | 0.12377400  |
| H | 4.98332700  | -0.91201500 | 1.17934800  |
| H | 5.42138600  | -1.35563800 | -0.46284900 |
| C | 5.07561000  | 0.75474300  | -0.18488000 |
| H | 4.83825000  | 0.96084600  | -1.23622200 |
| H | 4.41607900  | 1.39946900  | 0.40996900  |
| C | 6.53356200  | 1.10855100  | 0.09353300  |
| H | 7.20534500  | 0.49550800  | -0.51543600 |
| H | 6.74422900  | 2.15797700  | -0.12752900 |

H 6.78393800 0.92933700 1.14395100

**Int35**

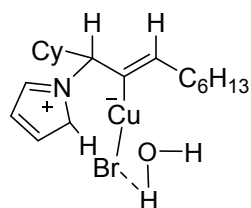

|    |             |             |             |
|----|-------------|-------------|-------------|
| C  | 1.88295300  | -0.18759900 | 0.94442200  |
| H  | 2.44734000  | -0.43448700 | 1.85929800  |
| C  | 0.60466300  | -1.00868500 | 0.81462100  |
| C  | 0.48652000  | -2.02059300 | 1.68922600  |
| N  | 1.52983500  | 1.25009000  | 1.10964300  |
| C  | 1.45617500  | 1.90184900  | 2.41019900  |
| H  | 0.75121900  | 1.34951400  | 3.04282000  |
| H  | 2.44976700  | 1.91459300  | 2.87298900  |
| C  | 1.08572100  | 2.05067300  | 0.18888400  |
| H  | 1.26053400  | -2.16764100 | 2.45761900  |
| H  | 1.03348000  | 1.75698500  | -0.85338700 |
| C  | 0.69615600  | 3.32540600  | 0.75407700  |
| C  | 0.92256500  | 3.25094300  | 2.07804100  |
| H  | 0.27413500  | 4.13653800  | 0.17924700  |
| H  | 0.73393900  | 4.01285100  | 2.82231600  |
| Cu | -0.72420600 | -0.26258000 | -0.51645200 |
| Br | -1.90981700 | 1.62682200  | -1.43765500 |
| O  | -1.35718900 | 1.16637800  | 2.15142700  |
| H  | -1.05767900 | 0.26527500  | 1.96346600  |
| H  | -1.80669700 | 1.44182900  | 1.33765900  |
| C  | 2.83091400  | -0.35167200 | -0.25694800 |
| C  | 4.08378700  | 0.52714600  | -0.14489500 |
| C  | 3.23087200  | -1.82383800 | -0.40996400 |
| H  | 2.27295500  | -0.06982500 | -1.16492900 |
| C  | 5.02275500  | 0.32586100  | -1.33656900 |
| H  | 4.61450400  | 0.26107500  | 0.78172000  |
| H  | 3.81550500  | 1.58692600  | -0.06090300 |
| C  | 4.17626300  | -2.02810200 | -1.59527100 |
| H  | 3.72721000  | -2.14898300 | 0.51749000  |
| H  | 2.33327100  | -2.43759500 | -0.51977600 |
| C  | 5.41788800  | -1.14346800 | -1.48446100 |
| H  | 5.91133200  | 0.95533400  | -1.22330800 |
| H  | 4.51373200  | 0.65679900  | -2.25212100 |
| H  | 4.46167100  | -3.08255500 | -1.66372600 |
| H  | 3.64171400  | -1.78487400 | -2.52352900 |

|   |             |             |             |
|---|-------------|-------------|-------------|
| H | 6.06489200  | -1.27791000 | -2.35722100 |
| H | 6.00173200  | -1.44819500 | -0.60513500 |
| C | -0.57302100 | -3.10062500 | 1.73105500  |
| H | -0.04598300 | -4.06211000 | 1.66231700  |
| H | -1.03921000 | -3.10468600 | 2.72786000  |
| C | -1.66281400 | -3.04441500 | 0.66087600  |
| H | -1.19718600 | -2.81935300 | -0.30888800 |
| H | -2.11791600 | -4.03626400 | 0.55546300  |
| C | -2.77018200 | -2.03028600 | 0.95338200  |
| H | -3.38520400 | -2.39442500 | 1.78740400  |
| H | -2.33825000 | -1.08485500 | 1.30591600  |
| C | -3.65753200 | -1.73587000 | -0.25311200 |
| H | -3.02857600 | -1.41637900 | -1.09885900 |
| H | -4.15958700 | -2.65766700 | -0.57920600 |
| C | -4.69038400 | -0.64526800 | 0.01575300  |
| H | -5.37025200 | -0.97597300 | 0.81168300  |
| H | -4.16924600 | 0.24500700  | 0.39093500  |
| C | -5.47489200 | -0.27133200 | -1.23738500 |
| H | -6.23450400 | 0.48566300  | -1.02557900 |
| H | -4.79594600 | 0.13532900  | -1.99329200 |
| H | -5.97890000 | -1.14627700 | -1.66180600 |

**TS19**

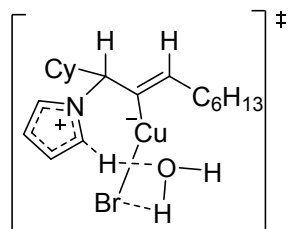

|   |             |             |             |
|---|-------------|-------------|-------------|
| C | 1.94462600  | -0.07222900 | 0.86446100  |
| H | 2.44337500  | -0.26214900 | 1.82949100  |
| C | 0.67141000  | -0.89752800 | 0.71344900  |
| C | 0.53718600  | -1.90553700 | 1.59413400  |
| N | 1.62224900  | 1.37958400  | 0.89554100  |
| C | 1.28197800  | 2.07646700  | 2.07427500  |
| H | -0.00811500 | 1.68478300  | 2.18468000  |
| H | 1.78315900  | 1.79428600  | 2.99440200  |
| C | 1.35510300  | 2.15408800  | -0.15058900 |
| H | 1.30091600  | -2.04327500 | 2.37470600  |
| H | 1.42526700  | 1.77690500  | -1.16235500 |
| C | 0.94429500  | 3.43072100  | 0.28056000  |
| C | 0.95888300  | 3.40518700  | 1.65890800  |
| H | 0.64129800  | 4.23897000  | -0.36698400 |
| H | 0.68498200  | 4.20647100  | 2.33167600  |

|    |             |             |             |
|----|-------------|-------------|-------------|
| Cu | -0.67093000 | -0.17430000 | -0.61647800 |
| Br | -2.24059500 | 1.59456400  | -1.11710600 |
| O  | -1.16634900 | 1.11743600  | 2.10707400  |
| H  | -0.90107500 | 0.19301300  | 1.90261300  |
| H  | -1.63827000 | 1.43225200  | 1.29914700  |
| C  | 2.97363000  | -0.35572300 | -0.24702300 |
| C  | 4.23774900  | 0.50342000  | -0.10485300 |
| C  | 3.34934400  | -1.84312400 | -0.25632800 |
| H  | 2.49575200  | -0.13805400 | -1.21578100 |
| C  | 5.26221500  | 0.19122700  | -1.19800600 |
| H  | 4.68568600  | 0.29881600  | 0.87915700  |
| H  | 3.99038300  | 1.56992700  | -0.12023200 |
| C  | 4.37922300  | -2.15669400 | -1.34363700 |
| H  | 3.76399300  | -2.10601600 | 0.72915600  |
| H  | 2.45107600  | -2.45030600 | -0.39339100 |
| C  | 5.63127700  | -1.29209900 | -1.20221200 |
| H  | 6.15444300  | 0.81086500  | -1.06117300 |
| H  | 4.83659500  | 0.45968900  | -2.17477200 |
| H  | 4.64044300  | -3.21926700 | -1.31077600 |
| H  | 3.92494400  | -1.97448200 | -2.32722600 |
| H  | 6.34018100  | -1.50765000 | -2.00812700 |
| H  | 6.13694700  | -1.53919900 | -0.25860400 |
| C  | -0.49556900 | -3.01201300 | 1.61443200  |
| H  | 0.06177500  | -3.95350500 | 1.51260400  |
| H  | -0.94936300 | -3.06307900 | 2.61542100  |
| C  | -1.60047500 | -2.96618100 | 0.55986000  |
| H  | -1.16437700 | -2.68400100 | -0.40860800 |
| H  | -2.00995700 | -3.97422000 | 0.42504400  |
| C  | -2.75640200 | -2.02732100 | 0.90464000  |
| H  | -3.28600100 | -2.41584500 | 1.78528900  |
| H  | -2.37618000 | -1.03990900 | 1.20192500  |
| C  | -3.73696000 | -1.82932400 | -0.24683800 |
| H  | -3.19758400 | -1.41177500 | -1.10964000 |
| H  | -4.13160300 | -2.80406200 | -0.56675200 |
| C  | -4.88901000 | -0.89245900 | 0.10464300  |
| H  | -5.48742100 | -1.33746100 | 0.91032400  |
| H  | -4.47210400 | 0.04419500  | 0.49477300  |
| C  | -5.76860900 | -0.58248300 | -1.10202700 |
| H  | -6.60689100 | 0.06571600  | -0.83367100 |
| H  | -5.18066700 | -0.07296500 | -1.87160500 |
| H  | -6.17812900 | -1.50064800 | -1.53663300 |

## Int36

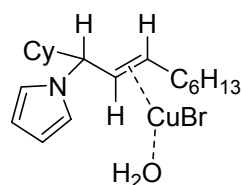

|    |             |             |             |
|----|-------------|-------------|-------------|
| C  | 2.00228500  | -0.42790300 | 0.07844800  |
| H  | 1.66803200  | -0.24065300 | -0.95247300 |
| C  | 0.86352200  | -1.08975500 | 0.84368300  |
| C  | 0.04526500  | -2.00190800 | 0.27221400  |
| N  | 3.12023500  | -1.35621400 | -0.03408100 |
| C  | 3.63224300  | -1.83419700 | -1.21178900 |
| H  | -1.53806100 | 2.59605400  | 0.74633200  |
| H  | 3.18762200  | -1.55124300 | -2.15523200 |
| C  | 3.85927800  | -1.84847100 | 1.01151400  |
| H  | 0.16102000  | -2.19479400 | -0.79809900 |
| H  | 3.61448000  | -1.59536200 | 2.03299000  |
| C  | 4.85070200  | -2.64925400 | 0.49449600  |
| C  | 4.70723300  | -2.63976600 | -0.91856700 |
| H  | 5.59293900  | -3.18410600 | 1.06833200  |
| H  | 5.31987400  | -3.16157800 | -1.63828700 |
| Cu | -0.90288200 | 0.05071100  | -0.11333900 |
| Br | -1.75074100 | 0.46607000  | -2.36512500 |
| O  | -2.04724200 | 1.78327600  | 0.64058200  |
| H  | 0.82723100  | -0.94022300 | 1.92484200  |
| H  | -2.47555100 | 1.85898500  | -0.23129200 |
| C  | 2.46115300  | 0.90925000  | 0.68252800  |
| C  | 3.61712700  | 1.49979200  | -0.13236300 |
| C  | 1.30074000  | 1.90697700  | 0.77598500  |
| H  | 2.82373500  | 0.71174700  | 1.70436900  |
| C  | 4.06417900  | 2.85575800  | 0.41495500  |
| H  | 3.28108000  | 1.62087800  | -1.17331200 |
| H  | 4.45523800  | 0.79580100  | -0.14814300 |
| C  | 1.75391100  | 3.26872500  | 1.31147200  |
| H  | 0.86719900  | 2.03623100  | -0.23085200 |
| H  | 0.51151500  | 1.50497700  | 1.42639300  |
| C  | 2.89745700  | 3.84217600  | 0.47507000  |
| H  | 4.87344700  | 3.25707600  | -0.20262900 |
| H  | 4.47480300  | 2.71958900  | 1.42466000  |
| H  | 0.90761000  | 3.96482700  | 1.33405800  |
| H  | 2.08990700  | 3.14810400  | 2.34998500  |
| H  | 3.22492400  | 4.80142200  | 0.88805200  |
| H  | 2.53620400  | 4.03842500  | -0.54344500 |
| C  | -0.94603000 | -2.87428200 | 0.99254200  |

|   |             |             |             |
|---|-------------|-------------|-------------|
| H | -0.68680500 | -3.91252100 | 0.75616400  |
| H | -0.83317500 | -2.75348200 | 2.07660800  |
| C | -2.40295700 | -2.59027700 | 0.57895100  |
| H | -2.43431200 | -2.34582400 | -0.49193600 |
| H | -3.00623700 | -3.49470800 | 0.70794200  |
| C | -3.03434700 | -1.45330600 | 1.38834700  |
| H | -3.29218700 | -1.82556400 | 2.38903300  |
| H | -2.30591200 | -0.64426400 | 1.56996700  |
| C | -4.26697600 | -0.85761100 | 0.71496800  |
| H | -3.97053200 | -0.44690000 | -0.26130100 |
| H | -4.98798800 | -1.65946500 | 0.50306200  |
| C | -4.94148200 | 0.23046700  | 1.54681100  |
| H | -5.25674600 | -0.19063200 | 2.51017200  |
| H | -4.20372500 | 1.01062400  | 1.76960900  |
| C | -6.14260400 | 0.84206500  | 0.83107400  |
| H | -6.61508900 | 1.62446300  | 1.43063000  |
| H | -5.83992200 | 1.28455100  | -0.12359800 |
| H | -6.89900700 | 0.08091100  | 0.61547500  |

### Int37

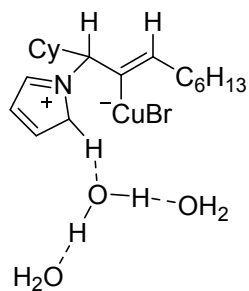

|    |             |             |             |
|----|-------------|-------------|-------------|
| C  | -1.88875100 | 0.55847500  | 0.84285900  |
| H  | -2.29546800 | 1.18644400  | 1.65194500  |
| C  | -0.62432800 | 1.15242600  | 0.22446300  |
| C  | -0.53678300 | 2.49162500  | 0.29919300  |
| N  | -1.54982500 | -0.73072000 | 1.49993000  |
| C  | -1.08448200 | -0.81563100 | 2.87196000  |
| H  | -0.12455600 | -0.24500600 | 2.97437800  |
| H  | -1.82630700 | -0.42397500 | 3.57358200  |
| C  | -1.37479000 | -1.87575200 | 0.90516000  |
| H  | -1.29474800 | 3.06473100  | 0.85408500  |
| H  | -1.57670400 | -2.01406200 | -0.15151000 |
| C  | -0.86445500 | -2.86118600 | 1.82720600  |
| C  | -0.72492500 | -2.24336400 | 3.01962200  |
| H  | -0.62910000 | -3.88039200 | 1.55808400  |
| H  | -0.34066600 | -2.66182800 | 3.94020100  |
| Cu | 0.52768000  | -0.23035900 | -0.69611400 |



|    |             |             |             |
|----|-------------|-------------|-------------|
| Br | 1.03367900  | -2.38499700 | -1.69483600 |
| O  | 1.69042500  | -0.04591200 | 3.26425500  |
| H  | 1.82010900  | 0.91559000  | 3.20117600  |
| H  | 2.12755100  | -0.43248000 | 2.48686800  |
| O  | 1.41257000  | 2.65615200  | 2.69073200  |
| O  | 2.71882300  | -1.26889400 | 0.92680100  |
| H  | 3.46599700  | -1.02832200 | 0.36739300  |
| H  | 2.23248000  | -1.92389200 | 0.39965800  |
| H  | 0.76715500  | 2.35183400  | 2.03024400  |
| H  | 2.11891900  | 3.04863500  | 2.16697000  |
| C  | -3.01365400 | 0.32801800  | -0.19152600 |
| C  | -4.25004800 | -0.33697700 | 0.43438000  |
| C  | -3.41955200 | 1.64859300  | -0.85877800 |
| H  | -2.61464100 | -0.32210500 | -0.98641100 |
| C  | -5.36613300 | -0.54491900 | -0.59233700 |
| H  | -4.61828300 | 0.31239500  | 1.24251300  |
| H  | -3.99483700 | -1.29677900 | 0.89679400  |
| C  | -4.53838100 | 1.44259200  | -1.88190900 |
| H  | -3.75882900 | 2.34853900  | -0.07973900 |
| H  | -2.54980100 | 2.10377300  | -1.33697200 |
| C  | -5.76066600 | 0.77461300  | -1.25394400 |
| H  | -6.23182500 | -1.01073900 | -0.11061200 |
| H  | -5.01690900 | -1.24552000 | -1.36288700 |
| H  | -4.81190500 | 2.40460400  | -2.32683900 |
| H  | -4.16217600 | 0.81215000  | -2.69882500 |
| H  | -6.53777000 | 0.60841700  | -2.00665800 |
| H  | -6.18822200 | 1.44408900  | -0.49513400 |
| C  | 0.46371500  | 3.38747900  | -0.40232300 |
| H  | -0.10767300 | 4.02906400  | -1.08715500 |
| H  | 0.90221700  | 4.08346100  | 0.32970700  |
| C  | 1.57998800  | 2.69615900  | -1.18238900 |
| H  | 1.14544100  | 1.90799700  | -1.81314600 |
| H  | 2.03444800  | 3.41750500  | -1.87196800 |
| C  | 2.68684800  | 2.10822600  | -0.30673600 |
| H  | 2.25850400  | 1.49489000  | 0.49826400  |
| H  | 3.23289700  | 2.93538200  | 0.17507000  |
| C  | 3.67477300  | 1.25080900  | -1.09346400 |
| H  | 3.16306100  | 0.33405200  | -1.42851200 |
| H  | 3.97505500  | 1.77371600  | -2.01131400 |
| C  | 4.92537800  | 0.89186300  | -0.29063600 |
| H  | 5.51092900  | 1.80278500  | -0.11766000 |
| H  | 4.63426600  | 0.54261300  | 0.71051000  |
| C  | 5.79134700  | -0.15578300 | -0.98642500 |
| H  | 6.11396200  | 0.20195200  | -1.96867100 |

|   |            |             |             |
|---|------------|-------------|-------------|
| H | 6.68355100 | -0.39708900 | -0.40378800 |
| H | 5.23600900 | -1.08644700 | -1.15317100 |

**TS20**

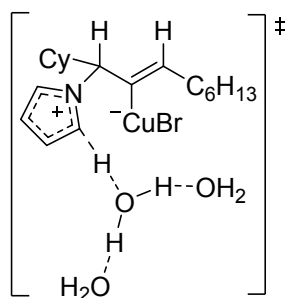

|    |             |             |             |
|----|-------------|-------------|-------------|
| C  | -1.90286700 | 0.48567300  | 0.81242600  |
| H  | -2.31415500 | 1.08226500  | 1.64284000  |
| C  | -0.64268800 | 1.11289700  | 0.22766900  |
| C  | -0.56020600 | 2.44900300  | 0.36047800  |
| N  | -1.59094400 | -0.83464000 | 1.41861400  |
| C  | -1.30397400 | -1.03029000 | 2.80086200  |
| H  | -0.12653300 | -0.63669900 | 2.94838800  |
| H  | -1.93162200 | -0.47536600 | 3.49534500  |
| C  | -1.36568900 | -1.95559900 | 0.76498000  |
| H  | -1.33835700 | 2.99441400  | 0.91670600  |
| H  | -1.40992200 | -2.00563000 | -0.31684600 |
| C  | -1.03386500 | -2.99899300 | 1.67270600  |
| C  | -1.06595500 | -2.45326900 | 2.92573800  |
| H  | -0.78882700 | -4.01098500 | 1.38716600  |
| H  | -0.84076200 | -2.94637000 | 3.86184000  |
| Cu | 0.52171100  | -0.18225900 | -0.78030500 |
| Br | 1.37327200  | -2.10793900 | -1.94607200 |
| O  | 1.25839300  | -0.33767800 | 3.09923700  |
| H  | 1.36894500  | 0.64017800  | 3.11341000  |
| H  | 1.77223300  | -0.69513400 | 2.33892400  |
| O  | 1.11653200  | 2.32963600  | 2.88932000  |
| O  | 2.66106000  | -1.39670300 | 1.02566300  |
| H  | 3.24799400  | -0.85178800 | 0.48739100  |
| H  | 2.23588100  | -1.97768400 | 0.37163200  |
| H  | 0.53076600  | 2.21929300  | 2.11673600  |
| H  | 1.88474700  | 2.80047900  | 2.54838900  |
| C  | -3.02938800 | 0.30057000  | -0.23140200 |
| C  | -4.26690600 | -0.37554200 | 0.37966100  |
| C  | -3.42813700 | 1.64067800  | -0.86131000 |
| H  | -2.63668600 | -0.33380100 | -1.04210700 |
| C  | -5.38767000 | -0.54815900 | -0.64788500 |
| H  | -4.62890400 | 0.25253900  | 1.20750300  |

|   |             |             |             |
|---|-------------|-------------|-------------|
| H | -4.01056200 | -1.34868400 | 0.81222700  |
| C | -4.55212700 | 1.46934400  | -1.88559400 |
| H | -3.76134400 | 2.32157800  | -0.06285000 |
| H | -2.55780800 | 2.10477200  | -1.33045500 |
| C | -5.77634900 | 0.79133400  | -1.27172900 |
| H | -6.25486200 | -1.02146200 | -0.17615100 |
| H | -5.04598200 | -1.22975200 | -1.43861500 |
| H | -4.82166300 | 2.44472300  | -2.30325100 |
| H | -4.18280300 | 0.85931100  | -2.72101100 |
| H | -6.55691000 | 0.65096100  | -2.02622500 |
| H | -6.19727300 | 1.44241900  | -0.49330900 |
| C | 0.46387000  | 3.38116900  | -0.25611500 |
| H | -0.07176900 | 4.02960600  | -0.96287200 |
| H | 0.83818000  | 4.06732500  | 0.52039700  |
| C | 1.65092200  | 2.73925000  | -0.97171700 |
| H | 1.28807900  | 1.97830200  | -1.67639800 |
| H | 2.15003200  | 3.50005600  | -1.58377900 |
| C | 2.69161300  | 2.12551100  | -0.03470500 |
| H | 2.20607800  | 1.45330700  | 0.68683000  |
| H | 3.16288300  | 2.93281500  | 0.54882800  |
| C | 3.77567900  | 1.34673600  | -0.77667100 |
| H | 3.32115200  | 0.45859000  | -1.24567000 |
| H | 4.16002500  | 1.94791500  | -1.61098800 |
| C | 4.94503500  | 0.93521100  | 0.12065500  |
| H | 5.50186300  | 1.83344500  | 0.41320300  |
| H | 4.56669000  | 0.51237100  | 1.06327400  |
| C | 5.87973000  | -0.06328200 | -0.55727000 |
| H | 6.27726100  | 0.35100800  | -1.48858400 |
| H | 6.72379700  | -0.32734100 | 0.08413100  |
| H | 5.34856800  | -0.98663300 | -0.81338500 |

**Int38**

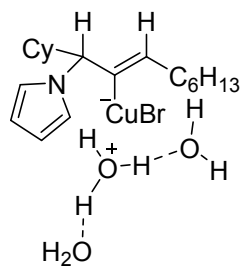

|   |             |             |            |
|---|-------------|-------------|------------|
| C | -2.03124800 | -0.02904000 | 0.88981900 |
| H | -2.55880100 | 0.00852200  | 1.85747500 |
| C | -0.72145600 | 0.73932200  | 0.94778100 |
| C | -0.61255300 | 1.58817100  | 1.99015300 |
| N | -1.80964000 | -1.47126000 | 0.64498900 |

|    |             |             |             |
|----|-------------|-------------|-------------|
| C  | -2.06490100 | -2.46340800 | 1.54446400  |
| H  | 0.12683900  | -3.22287400 | 1.51686500  |
| H  | -2.40349900 | -2.22328800 | 2.54224500  |
| C  | -1.43024700 | -2.03346900 | -0.54364400 |
| H  | -1.42881700 | 1.63830400  | 2.72733800  |
| H  | -1.21129500 | -1.41696400 | -1.40555800 |
| C  | -1.43648900 | -3.40781900 | -0.40147300 |
| C  | -1.83605200 | -3.68667400 | 0.93618700  |
| H  | -1.22013300 | -4.12969000 | -1.17715000 |
| H  | -1.98592000 | -4.65784900 | 1.38528800  |
| Cu | 0.56552600  | 0.47530000  | -0.57697200 |
| Br | 2.09700500  | 0.01672700  | -2.36868900 |
| O  | 1.04356500  | -2.87672700 | 1.59327000  |
| H  | 1.00854400  | -1.99479300 | 2.17397100  |
| H  | 1.42859200  | -2.76112800 | 0.60776200  |
| O  | 0.84612400  | -0.86178000 | 2.99205100  |
| O  | 1.80546500  | -2.76763400 | -0.73561300 |
| H  | 2.21841000  | -1.96331700 | -1.11787500 |
| H  | 0.97958500  | -2.85650200 | -1.23335100 |
| H  | 0.31689500  | -0.18613700 | 2.49278200  |
| H  | 1.67308500  | -0.42119200 | 3.22558000  |
| C  | -2.99969200 | 0.52740400  | -0.17476000 |
| C  | -4.29230600 | -0.29738900 | -0.24764000 |
| C  | -3.32366200 | 2.00096700  | 0.09841400  |
| H  | -2.49153400 | 0.47546900  | -1.15133300 |
| C  | -5.26829300 | 0.26874500  | -1.28106700 |
| H  | -4.76865500 | -0.28390500 | 0.74463900  |
| H  | -4.06688500 | -1.34466000 | -0.47658700 |
| C  | -4.30325000 | 2.56346900  | -0.93361000 |
| H  | -3.76536500 | 2.08288600  | 1.10387400  |
| H  | -2.40239800 | 2.58948200  | 0.11052900  |
| C  | -5.58742200 | 1.73628800  | -0.99520300 |
| H  | -6.18483200 | -0.32990900 | -1.29604900 |
| H  | -4.81942900 | 0.18537400  | -2.28025600 |
| H  | -4.52993300 | 3.60878300  | -0.70014600 |
| H  | -3.82290100 | 2.55704100  | -1.92154500 |
| H  | -6.26647600 | 2.13645000  | -1.75509200 |
| H  | -6.10905800 | 1.80944300  | -0.03088200 |
| C  | 0.47695600  | 2.59545700  | 2.29553600  |
| H  | -0.00493000 | 3.58262800  | 2.31044400  |
| H  | 0.82071500  | 2.44089800  | 3.33075200  |
| C  | 1.69113100  | 2.65330000  | 1.36911200  |
| H  | 1.35545000  | 2.70712900  | 0.32409100  |
| H  | 2.23298600  | 3.58737400  | 1.56079800  |

|   |            |             |             |
|---|------------|-------------|-------------|
| C | 2.67171200 | 1.49221500  | 1.52604300  |
| H | 2.15711400 | 0.54351400  | 1.31753800  |
| H | 3.01502500 | 1.44531800  | 2.57296600  |
| C | 3.87553200 | 1.58966700  | 0.59288400  |
| H | 3.51683400 | 1.77050600  | -0.42836000 |
| H | 4.49226700 | 2.45391300  | 0.87336900  |
| C | 4.72501500 | 0.32234700  | 0.58823100  |
| H | 5.12264400 | 0.13659300  | 1.59515300  |
| H | 4.07531600 | -0.52968800 | 0.34307400  |
| C | 5.86167900 | 0.39084000  | -0.42641100 |
| H | 6.52123300 | 1.23905600  | -0.21709900 |
| H | 6.46828100 | -0.51831400 | -0.41613400 |
| H | 5.45513800 | 0.51796900  | -1.43428900 |

**TS21**

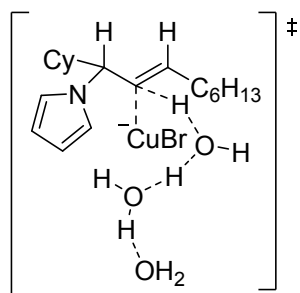

|    |             |             |             |
|----|-------------|-------------|-------------|
| C  | -2.03774400 | 0.15874000  | -1.04974700 |
| H  | -2.68899700 | 0.18417800  | -1.93625800 |
| C  | -0.66785300 | -0.40147800 | -1.40827700 |
| C  | -0.60626300 | -1.37791800 | -2.33280200 |
| N  | -1.91562400 | 1.56670000  | -0.62044700 |
| C  | -2.18563000 | 2.64997800  | -1.40401000 |
| H  | 0.19631800  | 3.74750600  | -0.90873500 |
| H  | -2.48618400 | 2.51724600  | -2.43320600 |
| C  | -1.56149200 | 1.99917300  | 0.63137800  |
| H  | -1.52968500 | -1.70865900 | -2.82517500 |
| H  | -1.34635400 | 1.29676700  | 1.42628500  |
| C  | -1.62321000 | 3.37836600  | 0.64992200  |
| C  | -2.01803400 | 3.79647900  | -0.65135100 |
| H  | -1.43375100 | 4.01071900  | 1.50632200  |
| H  | -2.19179400 | 4.80790700  | -0.98895600 |
| Cu | 0.58242600  | -0.30622100 | 0.24104300  |
| Br | 1.72029200  | -0.44194200 | 2.32725200  |
| O  | 1.09985800  | 3.40685900  | -1.02493100 |
| H  | 0.99903100  | 2.33222400  | -1.80936900 |
| H  | 1.41230200  | 3.16725300  | -0.10697700 |
| O  | 0.84924000  | 1.45370200  | -2.43701200 |

|   |             |             |             |
|---|-------------|-------------|-------------|
| O | 1.67456200  | 2.74003500  | 1.43467800  |
| H | 2.14157700  | 1.91706300  | 1.65830500  |
| H | 0.79900300  | 2.60199500  | 1.81858600  |
| H | 0.29661800  | 0.59486000  | -1.83905700 |
| H | 1.69119200  | 1.13377900  | -2.78518800 |
| C | -2.78676200 | -0.64618800 | 0.03953000  |
| C | -4.13757000 | 0.00383900  | 0.37682000  |
| C | -3.00096700 | -2.10894700 | -0.36693500 |
| H | -2.16193500 | -0.65423700 | 0.94843800  |
| C | -4.88966300 | -0.77512900 | 1.45719900  |
| H | -4.74497200 | 0.02841100  | -0.54063400 |
| H | -3.99779500 | 1.04275400  | 0.69114500  |
| C | -3.75637300 | -2.88787700 | 0.71290800  |
| H | -3.57456500 | -2.13705800 | -1.30659500 |
| H | -2.04009200 | -2.59195800 | -0.56359700 |
| C | -5.09553400 | -2.23271600 | 1.04751800  |
| H | -5.85078400 | -0.29242700 | 1.66177100  |
| H | -4.31264900 | -0.74029900 | 2.39146500  |
| H | -3.90397000 | -3.92234600 | 0.38628700  |
| H | -3.13714300 | -2.92744700 | 1.61927000  |
| H | -5.60560300 | -2.78665000 | 1.84211300  |
| H | -5.74669400 | -2.26968600 | 0.16329800  |
| C | 0.62599700  | -2.09459600 | -2.84223000 |
| H | 0.29238700  | -3.05900600 | -3.23936300 |
| H | 1.01372700  | -1.55071900 | -3.71891300 |
| C | 1.76821500  | -2.34418900 | -1.84476000 |
| H | 1.33861700  | -2.57491100 | -0.85942500 |
| H | 2.31220400  | -3.24399900 | -2.15592400 |
| C | 2.79140200  | -1.21826300 | -1.69484200 |
| H | 2.29471100  | -0.28961500 | -1.38252300 |
| H | 3.25127200  | -1.00673300 | -2.67258200 |
| C | 3.87038200  | -1.52924000 | -0.66029200 |
| H | 3.38659500  | -1.88395100 | 0.25880700  |
| H | 4.50817400  | -2.34650900 | -1.02263100 |
| C | 4.72359000  | -0.31225100 | -0.31362200 |
| H | 5.23619000  | 0.05229300  | -1.21386800 |
| H | 4.05498900  | 0.49438700  | 0.01888000  |
| C | 5.73440100  | -0.60817700 | 0.78930800  |
| H | 6.40949100  | -1.41804400 | 0.49485400  |
| H | 6.34245100  | 0.26907900  | 1.02417900  |
| H | 5.21428600  | -0.91509600 | 1.70187800  |

## Int39

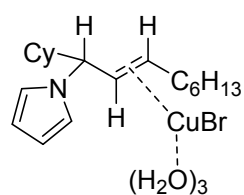

|    |             |             |             |
|----|-------------|-------------|-------------|
| C  | 2.32356100  | -0.65018900 | -0.17530400 |
| H  | 2.03267000  | -0.62996100 | -1.23423600 |
| C  | 1.17073700  | -1.24331200 | 0.61671900  |
| C  | 0.28597500  | -2.09209200 | 0.04800000  |
| N  | 3.45467700  | -1.56972300 | -0.08783800 |
| C  | 4.03948400  | -2.20953000 | -1.14786100 |
| H  | -0.06871400 | 3.73159100  | 1.54584900  |
| H  | 3.64349500  | -2.08691300 | -2.14562000 |
| C  | 4.14342500  | -1.87515500 | 1.05791900  |
| H  | 0.35083700  | -2.24106400 | -1.03315900 |
| H  | 3.83950100  | -1.47180900 | 2.01302700  |
| C  | 5.17606500  | -2.72067400 | 0.72447700  |
| C  | 5.11047800  | -2.93329400 | -0.67808100 |
| H  | 5.89349400  | -3.14138600 | 1.41344500  |
| H  | 5.76941000  | -3.54548200 | -1.27551800 |
| Cu | -0.72221500 | -0.01342900 | 0.15715400  |
| Br | -2.00988400 | 0.79769100  | -1.75502600 |
| O  | -0.71132200 | 3.26478000  | 2.08854500  |
| H  | -0.78017000 | 1.46789700  | 2.32537900  |
| H  | -1.54681000 | 3.25268100  | 1.58873500  |
| O  | -1.22953100 | 0.61708800  | 2.13871700  |
| O  | -3.09076900 | 2.32328600  | 0.96811900  |
| H  | -2.92998000 | 1.98030600  | 0.06489500  |
| H  | -4.00453800 | 2.62643100  | 0.98014600  |
| H  | 1.18508400  | -1.12207900 | 1.70204100  |
| H  | -2.14951500 | 0.91077700  | 2.01927700  |
| C  | 2.75461100  | 0.77477600  | 0.22147800  |
| C  | 4.01479700  | 1.17675200  | -0.55858200 |
| C  | 1.62556000  | 1.78483200  | -0.01868800 |
| H  | 2.99989300  | 0.77505000  | 1.29576200  |
| C  | 4.44181600  | 2.61358200  | -0.26195300 |
| H  | 3.80357900  | 1.07833100  | -1.63445800 |
| H  | 4.82836400  | 0.48109300  | -0.33116200 |
| C  | 2.06118900  | 3.23312000  | 0.22448500  |
| H  | 1.25732100  | 1.68318700  | -1.05028000 |
| H  | 0.77747700  | 1.57961200  | 0.64898500  |
| C  | 3.31392800  | 3.59604100  | -0.57136600 |
| H  | 5.33669800  | 2.86207300  | -0.84070500 |

|   |             |             |             |
|---|-------------|-------------|-------------|
| H | 4.71715300  | 2.69868900  | 0.79826500  |
| H | 1.24144700  | 3.90849800  | -0.05211500 |
| H | 2.26234700  | 3.37457200  | 1.29616700  |
| H | 3.61996300  | 4.62295300  | -0.34813900 |
| H | 3.08187900  | 3.55559500  | -1.64378100 |
| C | -0.67737100 | -2.99940000 | 0.76753000  |
| H | -0.22564500 | -3.99938900 | 0.73481800  |
| H | -0.74087000 | -2.71696300 | 1.82563500  |
| C | -2.07875700 | -3.04582000 | 0.12887600  |
| H | -1.99034300 | -2.82821700 | -0.94377000 |
| H | -2.48969200 | -4.05776900 | 0.20740100  |
| C | -3.06402200 | -2.05958500 | 0.75592100  |
| H | -2.57165300 | -1.09035900 | 0.91132400  |
| H | -3.34388500 | -2.40752100 | 1.75947400  |
| C | -4.30646500 | -1.81751700 | -0.09331800 |
| H | -3.98745900 | -1.52410200 | -1.10150700 |
| H | -4.88171800 | -2.74814100 | -0.19398600 |
| C | -5.19403900 | -0.71507700 | 0.47770500  |
| H | -5.55097300 | -1.00584400 | 1.47430000  |
| H | -4.57535800 | 0.18228500  | 0.61636600  |
| C | -6.37590700 | -0.38716600 | -0.42955300 |
| H | -6.99879700 | -1.27173700 | -0.59587300 |
| H | -7.01247400 | 0.39253200  | -0.00197000 |
| H | -6.02200800 | -0.04010000 | -1.40515700 |

**Int40**

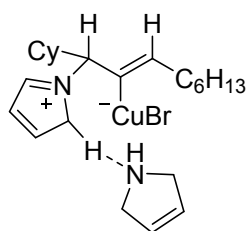

|   |            |            |             |
|---|------------|------------|-------------|
| C | 1.88509700 | 0.88871000 | 0.83808700  |
| H | 2.37323400 | 1.46988800 | 1.63795500  |
| C | 0.56620300 | 0.26987200 | 1.29195600  |
| C | 0.35538400 | 0.28834100 | 2.61704800  |
| N | 1.58645300 | 1.89324500 | -0.22154400 |
| C | 1.23553400 | 3.27403000 | 0.08093400  |
| H | 0.33384600 | 3.26992300 | 0.73157000  |
| H | 2.06183000 | 3.78429300 | 0.58506300  |
| C | 1.34759800 | 1.64192800 | -1.47563900 |
| H | 1.10332500 | 0.74376100 | 3.28308700  |
| H | 1.46197100 | 0.65084800 | -1.90149400 |
| C | 0.89716400 | 2.83328200 | -2.16212400 |



|    |             |             |             |
|----|-------------|-------------|-------------|
| C  | 0.85819700  | 3.82203600  | -1.24679300 |
| H  | 0.63097800  | 2.86391500  | -3.20862000 |
| H  | 0.55513700  | 4.84930100  | -1.40059700 |
| Cu | -0.47834600 | -0.48269600 | -0.27656400 |
| Br | -1.02361900 | -0.79408100 | -2.59221300 |
| C  | -2.31043700 | 2.45497000  | -0.43898900 |
| C  | -3.70015300 | 1.93242700  | -0.15692500 |
| C  | -3.98289200 | 2.06608900  | 1.13613100  |
| C  | -2.81022200 | 2.68722900  | 1.86310300  |
| N  | -1.69623100 | 2.62513600  | 0.89543200  |
| H  | -1.19249100 | 1.76052100  | 1.09650700  |
| H  | -2.36261300 | 3.41926400  | -0.96767300 |
| H  | -4.36082200 | 1.55297100  | -0.92758000 |
| H  | -4.92252000 | 1.81981300  | 1.61726100  |
| H  | -2.53704500 | 2.15876200  | 2.78339100  |
| H  | -1.71437500 | 1.77764000  | -1.06276400 |
| H  | -3.03162200 | 3.72821600  | 2.13821300  |
| C  | 2.89558300  | -0.14706000 | 0.31270200  |
| C  | 4.20910600  | 0.49346600  | -0.15627200 |
| C  | 3.17692800  | -1.19461200 | 1.39665000  |
| H  | 2.43022800  | -0.68048100 | -0.53185200 |
| C  | 5.20761800  | -0.55890300 | -0.64607000 |
| H  | 4.64874600  | 1.04110400  | 0.69070600  |
| H  | 4.02853200  | 1.23124400  | -0.94691000 |
| C  | 4.17828500  | -2.24433200 | 0.91100100  |
| H  | 3.57696300  | -0.68329800 | 2.28578300  |
| H  | 2.23941200  | -1.66724700 | 1.70001500  |
| C  | 5.48207200  | -1.60247800 | 0.43689200  |
| H  | 6.13766200  | -0.07379700 | -0.95968200 |
| H  | 4.79484800  | -1.05803400 | -1.53317300 |
| H  | 4.37378300  | -2.96731500 | 1.70915700  |
| H  | 3.72921200  | -2.80492400 | 0.07997200  |
| H  | 6.17233700  | -2.36554700 | 0.06346200  |
| H  | 5.97633200  | -1.11525900 | 1.28848900  |
| C  | -0.82789500 | -0.27462500 | 3.37500600  |
| H  | -0.46266400 | -1.05985600 | 4.05464300  |
| H  | -1.20568200 | 0.51527600  | 4.03970500  |
| C  | -1.97271500 | -0.83154200 | 2.52976000  |
| H  | -2.88073200 | -0.90021300 | 3.14170200  |
| H  | -2.21025000 | -0.11898300 | 1.72667200  |
| C  | -1.67561600 | -2.20174200 | 1.91503100  |
| H  | -1.72111200 | -2.97266000 | 2.69588600  |
| H  | -0.64188500 | -2.21308700 | 1.54368400  |
| C  | -2.62715100 | -2.56050800 | 0.77340300  |

|   |             |             |             |
|---|-------------|-------------|-------------|
| H | -2.72230000 | -1.70100300 | 0.09091300  |
| H | -3.63591800 | -2.73698500 | 1.17197400  |
| C | -2.16861300 | -3.76675400 | -0.04092100 |
| H | -2.08383000 | -4.64319600 | 0.61508200  |
| H | -1.16130200 | -3.56264600 | -0.42943500 |
| C | -3.10168800 | -4.06218900 | -1.21063900 |
| H | -3.12692100 | -3.20583600 | -1.89161400 |
| H | -2.77013100 | -4.93510600 | -1.77898100 |
| H | -4.12134900 | -4.25473000 | -0.85993600 |

**TS22**

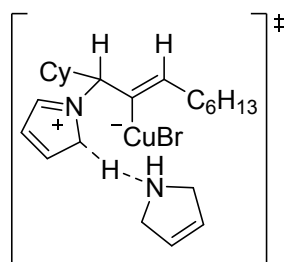

|    |             |             |             |
|----|-------------|-------------|-------------|
| C  | 1.88732700  | 0.84565600  | 0.76147300  |
| H  | 2.38739900  | 1.43309300  | 1.54925100  |
| C  | 0.57263400  | 0.24129600  | 1.24531400  |
| C  | 0.37063000  | 0.29724300  | 2.57124500  |
| N  | 1.60944900  | 1.83456300  | -0.31744300 |
| C  | 1.26658400  | 3.20229700  | -0.05920800 |
| H  | 0.12587600  | 3.11501700  | 0.38309100  |
| H  | 1.89943800  | 3.70566100  | 0.66949900  |
| C  | 1.37741900  | 1.56235000  | -1.58320400 |
| H  | 1.12960300  | 0.76405700  | 3.21697100  |
| H  | 1.43912300  | 0.55425800  | -1.97659000 |
| C  | 1.01262400  | 2.74773200  | -2.28859900 |
| C  | 1.01674700  | 3.76355200  | -1.37877500 |
| H  | 0.76765600  | 2.78477800  | -3.33956000 |
| H  | 0.77749600  | 4.80367400  | -1.55745200 |
| Cu | -0.48663600 | -0.55200000 | -0.29360000 |
| Br | -1.28516900 | -0.92045200 | -2.51314800 |
| C  | -2.22942300 | 2.58691100  | -0.51909400 |
| C  | -3.62171100 | 2.61429600  | 0.06201700  |
| C  | -3.58140800 | 2.86737900  | 1.36708100  |
| C  | -2.15404800 | 3.04368200  | 1.82881000  |
| N  | -1.35028700 | 2.58842200  | 0.67353900  |
| H  | -1.06037600 | 1.62506300  | 0.86349900  |
| H  | -2.03957400 | 3.48025500  | -1.13227400 |
| H  | -4.51338700 | 2.47834500  | -0.53807100 |
| H  | -4.43431300 | 2.98024300  | 2.02562500  |

|   |             |             |             |
|---|-------------|-------------|-------------|
| H | -1.89325900 | 2.45000700  | 2.71118100  |
| H | -2.02054800 | 1.70938400  | -1.14391400 |
| H | -1.94014000 | 4.09561700  | 2.06215300  |
| C | 2.88359600  | -0.21719500 | 0.26009700  |
| C | 4.20085700  | 0.38970600  | -0.24274200 |
| C | 3.16260300  | -1.23228000 | 1.37505200  |
| H | 2.40484600  | -0.77050200 | -0.56396600 |
| C | 5.17922600  | -0.69357600 | -0.70569900 |
| H | 4.65652900  | 0.95983900  | 0.58054500  |
| H | 4.02028100  | 1.10208900  | -1.05552700 |
| C | 4.14508500  | -2.31161700 | 0.91757500  |
| H | 3.57842300  | -0.69643100 | 2.24237000  |
| H | 2.22332700  | -1.68325300 | 1.70470000  |
| C | 5.45198500  | -1.70345500 | 0.40887700  |
| H | 6.11234500  | -0.23319700 | -1.04643700 |
| H | 4.74970000  | -1.21716000 | -1.57059100 |
| H | 4.33972800  | -3.00879900 | 1.73872400  |
| H | 3.68085100  | -2.89506100 | 0.11092700  |
| H | 6.12899700  | -2.48772400 | 0.05527100  |
| H | 5.96043300  | -1.19376900 | 1.23867300  |
| C | -0.80638000 | -0.23748000 | 3.36057600  |
| H | -0.43956200 | -1.02134300 | 4.04088300  |
| H | -1.15801400 | 0.56345500  | 4.02677200  |
| C | -1.98017300 | -0.78902200 | 2.55169800  |
| H | -2.87460900 | -0.82847700 | 3.18514800  |
| H | -2.22535800 | -0.09014100 | 1.73679000  |
| C | -1.72029600 | -2.17987600 | 1.96794000  |
| H | -1.73585900 | -2.92094600 | 2.77856300  |
| H | -0.70335600 | -2.21363300 | 1.55406400  |
| C | -2.72192500 | -2.57365300 | 0.88342800  |
| H | -2.82882700 | -1.74664700 | 0.16498100  |
| H | -3.71546100 | -2.71907200 | 1.32991200  |
| C | -2.30971400 | -3.82232000 | 0.10893300  |
| H | -2.20345600 | -4.66759600 | 0.80182000  |
| H | -1.31904300 | -3.64631300 | -0.33192300 |
| C | -3.29529000 | -4.16310300 | -1.00382200 |
| H | -3.34601300 | -3.33789500 | -1.72082200 |
| H | -2.99393600 | -5.06318700 | -1.54603200 |
| H | -4.29942500 | -4.33191200 | -0.60018900 |

## Int41

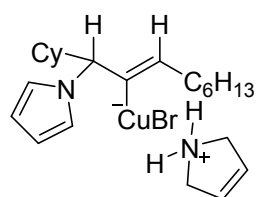

|    |             |             |             |
|----|-------------|-------------|-------------|
| C  | 2.06329000  | -0.38321100 | -0.81486200 |
| H  | 2.66743600  | -0.67965400 | -1.68842200 |
| C  | 0.57865200  | -0.34730100 | -1.15479600 |
| C  | 0.25349000  | -0.68531600 | -2.41488000 |
| N  | 2.29832800  | -1.44832000 | 0.18550400  |
| C  | 2.65377200  | -2.72950000 | -0.13248400 |
| H  | 0.31221300  | -2.93430300 | 0.87315100  |
| H  | 2.92416900  | -2.98295200 | -1.14788100 |
| C  | 2.01119000  | -1.38146700 | 1.52161700  |
| H  | 1.05492300  | -0.92809600 | -3.12929900 |
| H  | 1.69054500  | -0.45831400 | 1.98457600  |
| C  | 2.19184600  | -2.63962000 | 2.06882000  |
| C  | 2.60243200  | -3.50045100 | 1.01257500  |
| H  | 2.07596300  | -2.89306100 | 3.11246900  |
| H  | 2.86791600  | -4.54501800 | 1.08737700  |
| Cu | -0.54128500 | 0.45212000  | 0.35215600  |
| Br | -1.68829800 | 0.93489000  | 2.37472500  |
| C  | -1.80536500 | -2.73513800 | 0.87436800  |
| C  | -2.67900600 | -3.36584500 | -0.17350200 |
| C  | -1.96127100 | -3.91148300 | -1.15068700 |
| C  | -0.48617200 | -3.73458500 | -0.91601400 |
| N  | -0.45787700 | -2.75206400 | 0.21166000  |
| H  | -0.25013400 | -1.79152400 | -0.20616900 |
| H  | -1.76256800 | -3.32475800 | 1.79543300  |
| H  | -3.75867500 | -3.36459600 | -0.09494400 |
| H  | -2.34927600 | -4.43952400 | -2.01246300 |
| H  | 0.06130700  | -3.29534700 | -1.75603900 |
| H  | -2.06444900 | -1.70417600 | 1.14248200  |
| H  | 0.01904200  | -4.65589800 | -0.60900800 |
| C  | 2.60654800  | 0.96221400  | -0.31262300 |
| C  | 4.09045900  | 0.88615300  | 0.06417900  |
| C  | 2.37801500  | 2.05222800  | -1.36660100 |
| H  | 2.03127100  | 1.24994000  | 0.58365300  |
| C  | 4.61733300  | 2.24187600  | 0.54001700  |
| H  | 4.65901000  | 0.56690100  | -0.82226000 |
| H  | 4.25041900  | 0.12483200  | 0.83475000  |
| C  | 2.90900300  | 3.40737200  | -0.89446300 |
| H  | 2.89265000  | 1.75670200  | -2.29395400 |

|   |             |             |             |
|---|-------------|-------------|-------------|
| H | 1.31185200  | 2.12006500  | -1.60649300 |
| C | 4.38806100  | 3.32571200  | -0.51420300 |
| H | 5.68114200  | 2.16511900  | 0.78762400  |
| H | 4.09581400  | 2.52311000  | 1.46497200  |
| H | 2.75327300  | 4.16168600  | -1.67243600 |
| H | 2.32905900  | 3.73009800  | -0.01915600 |
| H | 4.74364800  | 4.29500400  | -0.14993000 |
| H | 4.97770500  | 3.08581400  | -1.40980600 |
| C | -1.12454600 | -0.79666200 | -3.03331600 |
| H | -1.11602200 | -0.25314200 | -3.98875400 |
| H | -1.28962700 | -1.84950700 | -3.31411900 |
| C | -2.30220000 | -0.30567400 | -2.19416500 |
| H | -3.23839600 | -0.66711100 | -2.63804600 |
| H | -2.25657000 | -0.76011900 | -1.19359400 |
| C | -2.36782100 | 1.21411400  | -2.04915600 |
| H | -2.55069600 | 1.66574100  | -3.03347700 |
| H | -1.38652400 | 1.58949100  | -1.72827100 |
| C | -3.43348700 | 1.67019100  | -1.05377500 |
| H | -3.37508700 | 1.04940100  | -0.14911800 |
| H | -4.43380400 | 1.51068300  | -1.47992300 |
| C | -3.27069300 | 3.12743000  | -0.63154700 |
| H | -3.32220200 | 3.77786100  | -1.51478400 |
| H | -2.26667600 | 3.24981800  | -0.20370000 |
| C | -4.30721000 | 3.54895200  | 0.40426900  |
| H | -4.20055300 | 2.93948500  | 1.30701200  |
| H | -4.18742600 | 4.59761400  | 0.68876000  |
| H | -5.32408500 | 3.41787900  | 0.01909400  |

**TS23**

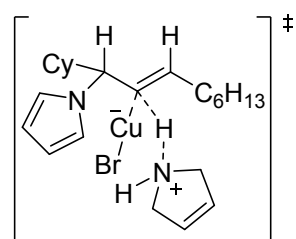

|   |            |            |             |
|---|------------|------------|-------------|
| C | 2.08824300 | 0.12222900 | 0.85433000  |
| H | 2.71848000 | 0.27767800 | 1.74434700  |
| C | 0.66530700 | 0.59941500 | 1.11824000  |
| C | 0.29784600 | 0.80237600 | 2.39618300  |
| N | 2.67689900 | 0.96938100 | -0.19955800 |
| C | 3.31000900 | 2.15678600 | 0.04617700  |
| H | 1.04700200 | 2.76118200 | -1.05524300 |
| H | 3.56696500 | 2.43653600 | 1.05815800  |
| C | 2.45399600 | 0.85129000 | -1.54618000 |

|    |             |             |             |
|----|-------------|-------------|-------------|
| H  | 1.03042100  | 0.61368600  | 3.19200600  |
| H  | 1.94617200  | -0.00741600 | -1.96339400 |
| C  | 2.96833600  | 1.97175800  | -2.16960800 |
| C  | 3.51364900  | 2.80519200  | -1.15437800 |
| H  | 2.97556000  | 2.15045700  | -3.23480600 |
| H  | 4.02289700  | 3.74835200  | -1.28824100 |
| Cu | -0.58224600 | -0.26796800 | -0.32474200 |
| Br | -1.55597300 | -1.29892000 | -2.20660400 |
| C  | -1.04604000 | 2.95037900  | -1.12852100 |
| C  | -1.80398200 | 3.88759500  | -0.22935800 |
| C  | -1.01922000 | 4.38736700  | 0.72075800  |
| C  | 0.38546900  | 3.86279500  | 0.59922800  |
| N  | 0.24828600  | 2.78959900  | -0.41531000 |
| H  | 0.27756200  | 1.66074200  | 0.20766200  |
| H  | -0.89335800 | 3.36750100  | -2.13025900 |
| H  | -2.85375800 | 4.10900800  | -0.37714900 |
| H  | -1.31349900 | 5.09540600  | 1.48578800  |
| H  | 0.77556400  | 3.41984200  | 1.52481200  |
| H  | -1.52643500 | 1.96935800  | -1.25513200 |
| H  | 1.09538300  | 4.62802000  | 0.26467200  |
| C  | 2.19590700  | -1.36761500 | 0.47604800  |
| C  | 3.65420100  | -1.78381900 | 0.24335000  |
| C  | 1.55301300  | -2.25953800 | 1.54495200  |
| H  | 1.63747100  | -1.53445800 | -0.46079100 |
| C  | 3.76414300  | -3.26436900 | -0.12614400 |
| H  | 4.21865400  | -1.59769900 | 1.16957700  |
| H  | 4.10665600  | -1.16141700 | -0.53523100 |
| C  | 1.66289900  | -3.73923200 | 1.17314900  |
| H  | 2.05573900  | -2.07907700 | 2.50803300  |
| H  | 0.50154700  | -1.98759100 | 1.68506300  |
| C  | 3.11677300  | -4.14989400 | 0.93890600  |
| H  | 4.81537800  | -3.53638900 | -0.26643500 |
| H  | 3.26217100  | -3.43193700 | -1.08848700 |
| H  | 1.21087900  | -4.35424300 | 1.95793600  |
| H  | 1.08274500  | -3.91605800 | 0.25720400  |
| H  | 3.17368700  | -5.20344200 | 0.64678300  |
| H  | 3.67550200  | -4.04866800 | 1.87977000  |
| C  | -1.02904100 | 1.31766600  | 2.90717700  |
| H  | -0.91122400 | 2.39046800  | 3.12602800  |
| H  | -1.22733200 | 0.84981900  | 3.88022100  |
| C  | -2.24051700 | 1.11102300  | 1.99870600  |
| H  | -2.01607300 | 1.48784200  | 0.99236800  |
| H  | -3.07052500 | 1.72960000  | 2.36154100  |
| C  | -2.70140300 | -0.34344200 | 1.90936000  |

|   |             |             |             |
|---|-------------|-------------|-------------|
| H | -1.84417300 | -0.99237800 | 1.67285300  |
| H | -3.05617100 | -0.67439700 | 2.89471500  |
| C | -3.79121700 | -0.55629600 | 0.86158500  |
| H | -4.69880300 | -0.01209500 | 1.15878100  |
| H | -3.46306700 | -0.12249500 | -0.09370100 |
| C | -4.11758800 | -2.02789100 | 0.62592700  |
| H | -3.19167400 | -2.54797900 | 0.34956400  |
| H | -4.47560800 | -2.47955800 | 1.56059000  |
| C | -5.14416000 | -2.21723600 | -0.48597500 |
| H | -4.74809700 | -1.82347100 | -1.42701100 |
| H | -5.38193500 | -3.27335000 | -0.63672200 |
| H | -6.07654600 | -1.69021400 | -0.25659500 |

**Int42**

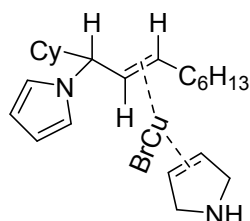

|    |             |             |             |
|----|-------------|-------------|-------------|
| C  | 2.17606900  | -0.59750800 | -0.75138200 |
| H  | 2.00488100  | -0.47503200 | -1.82901200 |
| C  | 0.93588600  | -1.22564300 | -0.13660000 |
| C  | -0.05149400 | -1.76451200 | -0.89017800 |
| N  | 3.23755700  | -1.59253500 | -0.61392900 |
| C  | 3.92564200  | -2.18168500 | -1.64004900 |
| H  | 1.60122800  | -0.37864400 | 3.82011700  |
| H  | 3.66928500  | -1.96458600 | -2.66691800 |
| C  | 3.76009800  | -2.01502000 | 0.58244600  |
| H  | -0.03226800 | -1.57680700 | -1.96659000 |
| H  | 3.35035900  | -1.65607300 | 1.51679400  |
| C  | 4.79117000  | -2.88525300 | 0.31412100  |
| C  | 4.89675200  | -2.99145400 | -1.09866300 |
| H  | 5.39695700  | -3.39227300 | 1.05051600  |
| H  | 5.60080100  | -3.59150700 | -1.65550400 |
| Cu | -0.83117400 | 0.22143600  | 0.00086400  |
| Br | -2.39577300 | 1.68476800  | -1.11909300 |
| C  | 0.65212700  | 1.22332400  | 2.90775400  |
| C  | -0.75293900 | 1.19711100  | 2.36133000  |
| C  | -1.28609400 | -0.02231900 | 2.52767900  |
| C  | -0.29397000 | -0.94005500 | 3.19544500  |
| N  | 0.97026000  | -0.20545800 | 3.04684900  |
| H  | 1.00014400  | -1.43828300 | 0.93177400  |
| H  | 0.65460200  | 1.77260900  | 3.86439000  |

|   |             |             |             |
|---|-------------|-------------|-------------|
| H | -1.27113700 | 2.06889800  | 1.97337800  |
| H | -2.31469600 | -0.29954000 | 2.32194000  |
| H | -0.23349500 | -1.92970800 | 2.72378100  |
| H | 1.36534600  | 1.72314600  | 2.24412700  |
| H | -0.59352700 | -1.10181500 | 4.24438600  |
| C | 2.64902800  | 0.76024700  | -0.19208000 |
| C | 4.02018500  | 1.11709800  | -0.79040200 |
| C | 1.63711800  | 1.87347800  | -0.48640100 |
| H | 2.75993200  | 0.65628400  | 0.89927900  |
| C | 4.50321200  | 2.50063700  | -0.35610000 |
| H | 3.93503600  | 1.09602600  | -1.88798500 |
| H | 4.75503500  | 0.35377900  | -0.51654800 |
| C | 2.13581400  | 3.26543800  | -0.08883300 |
| H | 1.38841600  | 1.86984400  | -1.55732400 |
| H | 0.69149900  | 1.70061300  | 0.04418200  |
| C | 3.48809800  | 3.58080500  | -0.72392800 |
| H | 5.47611200  | 2.71039300  | -0.81159500 |
| H | 4.65635700  | 2.50451400  | 0.73206000  |
| H | 1.38398200  | 4.00944500  | -0.36928200 |
| H | 2.24356100  | 3.31806200  | 1.00403700  |
| H | 3.83782400  | 4.56715100  | -0.40302100 |
| H | 3.37704800  | 3.61968300  | -1.81577100 |
| C | -1.06284300 | -2.78736000 | -0.43822800 |
| H | -0.67236800 | -3.75074800 | -0.79189600 |
| H | -1.07636600 | -2.84909200 | 0.65794000  |
| C | -2.48504300 | -2.57650500 | -0.98890500 |
| H | -2.42571300 | -2.03835900 | -1.94398300 |
| H | -2.94315400 | -3.54724200 | -1.20645000 |
| C | -3.39339100 | -1.80046400 | -0.03859700 |
| H | -3.59426700 | -2.40868300 | 0.85589000  |
| H | -2.87716800 | -0.89529500 | 0.30412600  |
| C | -4.69955200 | -1.34300600 | -0.67591700 |
| H | -4.45797600 | -0.75443500 | -1.56996200 |
| H | -5.28454800 | -2.21334200 | -1.00485400 |
| C | -5.53038500 | -0.47699600 | 0.26744300  |
| H | -5.77299100 | -1.04796000 | 1.17397500  |
| H | -4.91432200 | 0.37702700  | 0.57729600  |
| C | -6.81072100 | 0.03366500  | -0.38577700 |
| H | -7.44498600 | -0.79732300 | -0.71154100 |
| H | -7.39414900 | 0.65264600  | 0.30072200  |
| H | -6.57246700 | 0.63992600  | -1.26480400 |
